# Supplementary material for: Preparation and analysis of quinoa active protein (QAP) and its mechanism of inhibiting Candida albicans from a transcriptome perspective
Source: PeerJ. 2025 Feb 14;13:e18961. doi: 10.7717/peerj.18961 (PMC11831975; doi:10.7717/peerj.18961)
Supplement: Supplemental Information 7 [file peerj-13-18961-s007.xlsx]

## Sheet: Sheet1
Ammonium sulfate saturation section(%)	0-10	10-20	20-30	30-40	40-50	50-60	60-70	70-80
Inhibition zone diameter(mm)	13.64	13.94	13.67	20.42	20.02	18.82	18.74	10.28
	13.51	13.64	13.72	20.44	20.02	18.98	18.92	10.37
	13.58	13.6	13.84	20.72	20.29	18.98	18.87	10.43
