# Supplementary material for: Preparation and analysis of quinoa active protein (QAP) and its mechanism of inhibiting Candida albicans from a transcriptome perspective
Source: PeerJ. 2025 Feb 14;13:e18961. doi: 10.7717/peerj.18961 (PMC11831975; doi:10.7717/peerj.18961)
Supplement: Supplemental Information 8 [file peerj-13-18961-s008.xlsx]

## Sheet: Sheet1
G75	S30	S40	S50	S60	S70	S80
AUR62002139-RA	AUR62002139-RA	AUR62002139-RA	AUR62002139-RA	AUR62002139-RA	AUR62002139-RA	AUR62025870-RA
AUR62024712-RA	AUR62011869-RA	AUR62011869-RA	AUR62011869-RA	AUR62024712-RA	AUR62032318-RA	AUR62025870-RA
AUR62024716-RA	AUR62024716-RA	AUR62006360-RA	AUR62024716-RA	AUR62024716-RA	AUR62035617-RA	AUR62025870-RA
AUR62032929-RA	AUR62035617-RA	AUR62035617-RA	AUR62006360-RA	AUR62035617-RA	AUR62024716-RA	AUR62025870-RA
AUR62028591-RA	AUR62006360-RA	AUR62024716-RA	AUR62035617-RA	AUR62039712-RA	AUR62011869-RA	AUR62025870-RA
AUR62006360-RA	AUR62032318-RA	AUR62032318-RA	AUR62031441-RA	AUR62032318-RA	AUR62017741-RA	AUR62025870-RA
AUR62035617-RA	AUR62032929-RA	AUR62039712-RA	AUR62032318-RA	AUR62017741-RA	AUR62025870-RA	AUR62025870-RA
AUR62015570-RA	AUR62029196-RA	AUR62021100-RA	AUR62029196-RA	AUR62009776-RA	AUR62019063-RA	AUR62025870-RA
AUR62011869-RA	AUR62018166-RA	AUR62042417-RA;AUR62026906-RA;AUR62026903-RA	AUR62032929-RA	AUR62029196-RA	AUR62009776-RA	AUR62025870-RA
AUR62031439-RA	AUR62025870-RA	AUR62018166-RA	AUR62039712-RA	AUR62031441-RA	AUR62044656-RA;AUR62027945-RA;AUR62027941-RA;AUR62027933-RA;AUR62027932-RA;AUR62020772-RA;AUR62020771-RA;AUR62020770-RA;AUR62020767-RA	AUR62025870-RA
AUR62025870-RA	AUR62015174-RA	AUR62029196-RA	AUR62042417-RA;AUR62026906-RA;AUR62026903-RA	AUR62044656-RA;AUR62027945-RA;AUR62027941-RA;AUR62027933-RA;AUR62027932-RA;AUR62020772-RA;AUR62020771-RA;AUR62020770-RA;AUR62020767-RA	AUR62006286-RA	AUR62025870-RA
AUR62005133-RA;AUR62000840-RA	AUR62026333-RA	AUR62017741-RA	AUR62015174-RA	AUR62043702-RA;AUR62041368-RA	AUR62032926-RA	AUR62025870-RA
AUR62001001-RA	AUR62021100-RA	AUR62029228-RA;AUR62022776-RA	AUR62044656-RA;AUR62027945-RA;AUR62027941-RA;AUR62027933-RA;AUR62027932-RA;AUR62020772-RA;AUR62020771-RA;AUR62020770-RA;AUR62020767-RA	AUR62003403-RA	AUR62033162-RA	AUR62025870-RA
AUR62029572-RA	AUR62025011-RA	AUR62015174-RA	AUR62018554-RA	AUR62006523-RA	AUR62037642-RA	AUR62025870-RA
AUR62038696-RA;AUR62038692-RA;AUR62036331-RA;AUR62032034-RA;AUR62019879-RA;AUR62019878-RA;AUR62018209-RA;AUR62018208-RA;AUR62015297-RA;AUR62009606-RA;AUR62007016-RA;AUR62001820-RA	AUR62041432-RA;AUR62033562-RA	AUR62029572-RA	AUR62043190-RA;AUR62019569-RA	AUR62033162-RA	AUR62022530-RA	AUR62025870-RA
AUR62025011-RA	AUR62009776-RA	AUR62032119-RA	AUR62009776-RA	AUR62026333-RA	AUR62035682-RA	AUR62025870-RA
AUR62015569-RA	AUR62014124-RA;AUR62002760-RA	AUR62044656-RA;AUR62027945-RA;AUR62027941-RA;AUR62027933-RA;AUR62027932-RA;AUR62020772-RA;AUR62020771-RA;AUR62020770-RA;AUR62020767-RA	AUR62029572-RA	AUR62033587-RA	AUR62032931-RA	AUR62025870-RA
AUR62022853-RA	AUR62044656-RA;AUR62027945-RA;AUR62027941-RA;AUR62027933-RA;AUR62027932-RA;AUR62020772-RA;AUR62020771-RA;AUR62020770-RA;AUR62020767-RA	AUR62002760-RA	AUR62041432-RA;AUR62033562-RA	AUR62042417-RA;AUR62026906-RA;AUR62026903-RA	AUR62003403-RA	AUR62025870-RA
AUR62032926-RA	AUR62032119-RA	AUR62036893-RA	AUR62021100-RA	AUR62015570-RA	AUR62039374-RA	AUR62025870-RA
AUR62015174-RA	AUR62043702-RA;AUR62041368-RA	AUR62009776-RA	AUR62032119-RA	AUR62039374-RA	AUR62006284-RA	AUR62025870-RA
AUR62010320-RA	AUR62042417-RA;AUR62026906-RA;AUR62026903-RA	AUR62018567-RA	AUR62002760-RA	AUR62032926-RA	AUR62035028-RA	AUR62025870-RA
AUR62041432-RA;AUR62033562-RA	AUR62019063-RA	AUR62021097-RA	AUR62018166-RA	AUR62015174-RA	AUR62029991-RA	AUR62025870-RA
AUR62017949-RA	AUR62031441-RA	AUR62044500-RA;AUR62044340-RA	AUR62006523-RA	AUR62006360-RA	AUR62002012-RA	AUR62025870-RA
AUR62043467-RA;AUR62021937-RA	AUR62044500-RA;AUR62044340-RA	AUR62043105-RA	AUR62033587-RA	AUR62003182-RA	AUR62037208-RA	AUR62025870-RA
AUR62016175-RA	AUR62020865-RA;AUR62018554-RA	AUR62041432-RA;AUR62033562-RA	AUR62015570-RA	AUR62019540-RA	AUR62034727-RA	AUR62025870-RA
AUR62024433-RA	AUR62032931-RA	AUR62021171-RA	AUR62018510-RA	AUR62037768-RA	AUR62010089-RA	AUR62025870-RA
AUR62038844-RA	AUR62015570-RA	AUR62015570-RA	AUR62044500-RA;AUR62044340-RA	AUR62019063-RA	AUR62009632-RA	AUR62025870-RA
AUR62036261-RA	AUR62033587-RA	AUR62020865-RA;AUR62018554-RA	AUR62029228-RA	AUR62029841-RA	AUR62025011-RA	AUR62025870-RA
AUR62031771-RA;AUR62030515-RA;AUR62023973-RA	AUR62029572-RA	AUR62029841-RA	AUR62000840-RA	AUR62029991-RA	AUR62010443-RA	AUR62025870-RA
AUR62030978-RA	AUR62033162-RA	AUR62014323-RA	AUR62026333-RA	AUR62043467-RA;AUR62021937-RA	AUR62003182-RA	AUR62025870-RA
AUR62013758-RA;AUR62013755-RA	AUR62035682-RA	AUR62035925-RA	AUR62033738-RA	AUR62041432-RA;AUR62033562-RA	AUR62009110-RA	AUR62025870-RA
AUR62017741-RA	AUR62039374-RA	AUR62033162-RA	AUR62033162-RA	AUR62040536-RA	AUR62033587-RA	AUR62025870-RA
AUR62031519-RA	AUR62035324-RA	AUR62032014-RA	AUR62035682-RA	AUR62005716-RA	AUR62037768-RA	AUR62025870-RA
AUR62030215-RA;AUR62027520-RA	AUR62022530-RA	AUR62003403-RA	AUR62029841-RA	AUR62035682-RA	AUR62034046-RA;AUR62029769-RA;AUR62002671-RA	AUR62025870-RA
AUR62029725-RA	AUR62043467-RA;AUR62021937-RA	AUR62026333-RA	AUR62042922-RA;AUR62015238-RA	AUR62037642-RA	AUR62000840-RA	AUR62025870-RA
AUR62035682-RA;AUR62017128-RA	AUR62032926-RA	AUR62032926-RA	AUR62002012-RA	AUR62002012-RA	AUR62011027-RA	AUR62025870-RA
AUR62020601-RA	AUR62037208-RA	AUR62043190-RA;AUR62019569-RA	AUR62037642-RA	AUR62000840-RA	AUR62039535-RA	AUR62025870-RA
AUR62041371-RA	AUR62000840-RA	AUR62025011-RA	AUR62014323-RA	AUR62022530-RA	AUR62001816-RA	AUR62025870-RA
AUR62034727-RA	AUR62043788-RA;AUR62042354-RA	AUR62033587-RA	AUR62009067-RA	AUR62006286-RA	AUR62036097-RA	AUR62025870-RA
AUR62033738-RA;AUR62029956-RA	AUR62036893-RA	AUR62036860-RA	AUR62036893-RA	AUR62020865-RA	AUR62029196-RA	AUR62025870-RA
AUR62031065-RA;AUR62026056-RA;AUR62024465-RA;AUR62008303-RA	AUR62033738-RA	AUR62039374-RA	AUR62002570-RA	AUR62032931-RA	AUR62006360-RA	AUR62025870-RA
AUR62044656-RA;AUR62027945-RA;AUR62027941-RA;AUR62027933-RA;AUR62027932-RA;AUR62020772-RA;AUR62020771-RA;AUR62020770-RA;AUR62020767-RA	AUR62003403-RA	AUR62016208-RA	AUR62043467-RA;AUR62021937-RA	AUR62014124-RA;AUR62002760-RA	AUR62018166-RA	AUR62025870-RA
AUR62032318-RA	AUR62036860-RA	AUR62026843-RA	AUR62018567-RA	AUR62002137-RA	AUR62035262-RA;AUR62002903-RA	AUR62025870-RA
AUR62018034-RA	AUR62042922-RA;AUR62015238-RA	AUR62009549-RA	AUR62022369-RA	AUR62010443-RA	AUR62031771-RA;AUR62030778-RA;AUR62030515-RA;AUR62023973-RA	AUR62025870-RA
AUR62003182-RA	AUR62043105-RA	AUR62029991-RA	AUR62043105-RA	AUR62011869-RA	AUR62021576-RA	AUR62025870-RA
AUR62036893-RA	AUR62012221-RA	AUR62018510-RA	AUR62032014-RA	AUR62037208-RA	AUR62043467-RA;AUR62021937-RA	AUR62025870-RA
AUR62020539-RA	AUR62002570-RA	AUR62018034-RA	AUR62015572-RA	AUR62039154-RA	AUR62037601-RA	AUR62025870-RA
AUR62028474-RA;AUR62006239-RA	AUR62029228-RA	AUR62022530-RA	AUR62032931-RA	AUR62018510-RA	AUR62031370-RA	AUR62025870-RA
AUR62001811-RA	AUR62043190-RA;AUR62019569-RA	AUR62002012-RA	AUR62031771-RA;AUR62030778-RA;AUR62030515-RA;AUR62023973-RA	AUR62042432-RA	AUR62015570-RA	AUR62025870-RA
AUR62015572-RA	AUR62037132-RA	AUR62023310-RA	AUR62032926-RA	AUR62025900-RA	AUR62030687-RA	AUR62025870-RA
AUR62044500-RA;AUR62044340-RA	AUR62019540-RA	AUR62031771-RA;AUR62030778-RA;AUR62030515-RA;AUR62023973-RA	AUR62019540-RA	AUR62042305-RA;AUR62037601-RA	AUR62032929-RA	AUR62025870-RA
AUR62000839-RA	AUR62002012-RA	AUR62037153-RA	AUR62043319-RA	AUR62030627-RA	AUR62030978-RA	AUR62025870-RA
AUR62027317-RA;AUR62007415-RA	AUR62003182-RA	AUR62000840-RA	AUR62025125-RA	AUR62032642-RA	AUR62024981-RA	AUR62025870-RA
AUR62021910-RA;AUR62012748-RA	AUR62020539-RA	AUR62035682-RA	AUR62032642-RA	AUR62034727-RA	AUR62014124-RA	AUR62025870-RA
AUR62033260-RA;AUR62021346-RA	AUR62031771-RA;AUR62030778-RA;AUR62030515-RA;AUR62023973-RA	AUR62040809-RA	AUR62037208-RA	AUR62042922-RA;AUR62015238-RA	AUR62013094-RA	AUR62025870-RA
AUR62033162-RA	AUR62002137-RA	AUR62043467-RA;AUR62021937-RA	AUR62022530-RA	AUR62044500-RA;AUR62044340-RA	AUR62030233-RA;AUR62028806-RA;AUR62027613-RA;AUR62005753-RA	AUR62025870-RA
AUR62034046-RA;AUR62029769-RA;AUR62002671-RA	AUR62005134-RA	AUR62024433-RA	AUR62028839-RA;AUR62005716-RA	AUR62021100-RA	AUR62043788-RA;AUR62042354-RA	AUR62025870-RA
AUR62039005-RA;AUR62038932-RA	AUR62037642-RA	AUR62035093-RA	AUR62017741-RA	AUR62000839-RA	AUR62028839-RA;AUR62005716-RA	AUR62025870-RA
AUR62025559-RA	AUR62005728-RA	AUR62001811-RA	AUR62043788-RA;AUR62042354-RA	AUR62030978-RA	AUR62011441-RA	AUR62025870-RA
AUR62020618-RA	AUR62017741-RA	AUR62028839-RA	AUR62043702-RA;AUR62041368-RA	AUR62033738-RA	AUR62033738-RA	AUR62014323-RA
AUR62009367-RA	AUR62028839-RA;AUR62005716-RA	AUR62002137-RA	AUR62021514-RA	AUR62022369-RA	AUR62024433-RA	AUR62014323-RA
AUR62015657-RA	AUR62026335-RA	AUR62033738-RA	AUR62034046-RA;AUR62029769-RA;AUR62002671-RA	AUR62043190-RA;AUR62019569-RA	AUR62028591-RA	AUR62014323-RA
AUR62029688-RA	AUR62009067-RA	AUR62020539-RA	AUR62024433-RA	AUR62031370-RA	AUR62043190-RA;AUR62019569-RA	AUR62014323-RA
AUR62021100-RA	AUR62009549-RA	AUR62037642-RA	AUR62039374-RA	AUR62036698-RA	AUR62021118-RA	AUR62014323-RA
AUR62032727-RA	AUR62020851-RA	AUR62034332-RA	AUR62003639-RA	AUR62009602-RA	AUR62039140-RA;AUR62039139-RA;AUR62009119-RA;AUR62009118-RA	AUR62014323-RA
AUR62041404-RA;AUR62016131-RA	AUR62018510-RA	AUR62028991-RA;AUR62025183-RA	AUR62030978-RA	AUR62010089-RA	AUR62005134-RA	AUR62014323-RA
AUR62036097-RA;AUR62019540-RA	AUR62040809-RA	AUR62012221-RA	AUR62038932-RA	AUR62032929-RA	AUR62021097-RA	AUR62014323-RA
AUR62042305-RA;AUR62037601-RA	AUR62040536-RA	AUR62009067-RA	AUR62020539-RA	AUR62043788-RA;AUR62042354-RA	AUR62001701-RA	AUR62014323-RA
AUR62040675-RA;AUR62036090-RA;AUR62019552-RA;AUR62015934-RA	AUR62032642-RA;AUR62026853-RA	AUR62037768-RA	AUR62037153-RA	AUR62023862-RA	AUR62018034-RA	AUR62014323-RA
AUR62018235-RA	AUR62036970-RA	AUR62026853-RA	AUR62027308-RA	AUR62040569-RA	AUR62031065-RA;AUR62008303-RA	AUR62014323-RA
AUR62013896-RA	AUR62030627-RA	AUR62032931-RA	AUR62020864-RA;AUR62018555-RA	AUR62034046-RA;AUR62029769-RA;AUR62002671-RA	AUR62015572-RA;AUR62002137-RA	AUR62014323-RA
AUR62030233-RA;AUR62028806-RA;AUR62027613-RA;AUR62005753-RA	AUR62034046-RA;AUR62029769-RA;AUR62002671-RA	AUR62038040-RA	AUR62012221-RA	AUR62030011-RA	AUR62013484-RA	AUR62014323-RA
AUR62039140-RA;AUR62039139-RA;AUR62009119-RA;AUR62009118-RA	AUR62010089-RA	AUR62030978-RA	AUR62003403-RA	AUR62020570-RA	AUR62030627-RA	AUR62014323-RA
AUR62021097-RA	AUR62009110-RA	AUR62030233-RA;AUR62028806-RA;AUR62027613-RA;AUR62005753-RA	AUR62039154-RA	AUR62013484-RA	AUR62021346-RA	AUR62014323-RA
AUR62006386-RA	AUR62028991-RA;AUR62025183-RA	AUR62037132-RA;AUR62025125-RA	AUR62000839-RA	AUR62015569-RA	AUR62027800-RA	AUR62014323-RA
AUR62028991-RA;AUR62025183-RA	AUR62001816-RA	AUR62019540-RA	AUR62010089-RA	AUR62020575-RA	AUR62016506-RA	AUR62014323-RA
AUR62026355-RA	AUR62034727-RA	AUR62043319-RA	AUR62003182-RA	AUR62021576-RA;AUR62008514-RA	AUR62022970-RA;AUR62012328-RA	AUR62014323-RA
AUR62032931-RA	AUR62023380-RA;AUR62013776-RA	AUR62025909-RA	AUR62030627-RA	AUR62039139-RA;AUR62009119-RA	AUR62015174-RA	AUR62014323-RA
AUR62042746-RA;AUR62018572-RA;AUR62017559-RA;AUR62015098-RA;AUR62004257-RA	AUR62015569-RA	AUR62039154-RA	AUR62037601-RA	AUR62004581-RA	AUR62039001-RA	AUR62014323-RA
AUR62035782-RA;AUR62035779-RA;AUR62035776-RA;AUR62027577-RA	AUR62033260-RA;AUR62021346-RA	AUR62000839-RA	AUR62021346-RA	AUR62031771-RA;AUR62030778-RA;AUR62030515-RA;AUR62023973-RA	AUR62018510-RA	AUR62014323-RA
AUR62040890-RA	AUR62018092-RA	AUR62010449-RA	AUR62035539-RA	AUR62015664-RA	AUR62032727-RA	AUR62014323-RA
AUR62037642-RA	AUR62035093-RA	AUR62034046-RA;AUR62029769-RA;AUR62002671-RA	AUR62028991-RA;AUR62025183-RA	AUR62024433-RA	AUR62020539-RA;AUR62015664-RA	AUR62014323-RA
AUR62009679-RA;AUR62006520-RA;AUR62001883-RA	AUR62022369-RA	AUR62030627-RA	AUR62034727-RA	AUR62037657-RA	AUR62021918-RA	AUR62014323-RA
AUR62030674-RA;AUR62024874-RA	AUR62001811-RA	AUR62032201-RA	AUR62009118-RA	AUR62037132-RA;AUR62025125-RA	AUR62029725-RA	AUR62014323-RA
AUR62005728-RA	AUR62029725-RA	AUR62040536-RA	AUR62006462-RA	AUR62017420-RA	AUR62008727-RA	AUR62014323-RA
AUR62020865-RA;AUR62018554-RA	AUR62033275-RA	AUR62039139-RA;AUR62009119-RA	AUR62040796-RA;AUR62036860-RA	AUR62029725-RA	AUR62037132-RA;AUR62025125-RA	AUR62014323-RA
AUR62018191-RA	AUR62018235-RA	AUR62043788-RA;AUR62042354-RA	AUR62037768-RA	AUR62020601-RA	AUR62042417-RA;AUR62026906-RA;AUR62026903-RA	AUR62014323-RA
AUR62004958-RA	AUR62009936-RA	AUR62015569-RA	AUR62040536-RA	AUR62024981-RA	AUR62030011-RA	AUR62014323-RA
AUR62043105-RA	AUR62039139-RA;AUR62009119-RA	AUR62043702-RA;AUR62041368-RA	AUR62023396-RA	AUR62041343-RA	AUR62016100-RA	AUR62014323-RA
AUR62026333-RA	AUR62039857-RA	AUR62001431-RA	AUR62024712-RA	AUR62029818-RA	AUR62019534-RA	AUR62014323-RA
AUR62009776-RA	AUR62042305-RA;AUR62037601-RA	AUR62040675-RA;AUR62036090-RA;AUR62019552-RA;AUR62015934-RA	AUR62032691-RA	AUR62020264-RA	AUR62038678-RA	AUR62014323-RA
AUR62027210-RA;AUR62019146-RA;AUR62014409-RA;AUR62003258-RA	AUR62020570-RA	AUR62034727-RA	AUR62021474-RA	AUR62028591-RA	AUR62026333-RA	AUR62014323-RA
AUR62026788-RA;AUR62013484-RA	AUR62041343-RA	AUR62013085-RA	AUR62030215-RA;AUR62027520-RA	AUR62028576-RA	AUR62036698-RA	AUR62014323-RA
AUR62023380-RA;AUR62013776-RA	AUR62024712-RA	AUR62023396-RA	AUR62013484-RA	AUR62035262-RA;AUR62002903-RA	AUR62019845-RA	AUR62014323-RA
AUR62025560-RA	AUR62019279-RA;AUR62000102-RA	AUR62038984-RA;AUR62036052-RA	AUR62031439-RA	AUR62040441-RA	AUR62040969-RA	AUR62014323-RA
AUR62014124-RA;AUR62002760-RA	AUR62017949-RA;AUR62003639-RA	AUR62037601-RA	AUR62012760-RA	AUR62033260-RA;AUR62021346-RA	AUR62027857-RA;AUR62019015-RA	AUR62014323-RA
AUR62039092-RA;AUR62037132-RA;AUR62025125-RA;AUR62010296-RA	AUR62023687-RA;AUR62002501-RA	AUR62031439-RA	AUR62025559-RA	AUR62028991-RA;AUR62025183-RA	AUR62006212-RA	AUR62014323-RA
AUR62043345-RA	AUR62013758-RA;AUR62013755-RA	AUR62027308-RA	AUR62001811-RA	AUR62038696-RA;AUR62038692-RA;AUR62036331-RA;AUR62032034-RA;AUR62030687-RA;AUR62019879-RA;AUR62019878-RA;AUR62018209-RA;AUR62018208-RA;AUR62015297-RA;AUR62009606-RA;AUR62007016-RA;AUR62001820-RA	AUR62040617-RA;AUR62040144-RA	AUR62014323-RA
AUR62024355-RA	AUR62023527-RA	AUR62030215-RA;AUR62027520-RA	AUR62027403-RA	AUR62018092-RA	AUR62034332-RA;AUR62022369-RA	AUR62011869-RA
AUR62016796-RA	AUR62014498-RA	AUR62042041-RA;AUR62038571-RA	AUR62025909-RA	AUR62009302-RA	AUR62009382-RA	AUR62011869-RA
AUR62005134-RA	AUR62024433-RA	AUR62032929-RA	AUR62037907-RA	AUR62012951-RA	AUR62041432-RA;AUR62033562-RA	AUR62011869-RA
AUR62001843-RA	AUR62012951-RA	AUR62039005-RA	AUR62023527-RA	AUR62019534-RA	AUR62024218-RA	AUR62011869-RA
AUR62037882-RA;AUR62033587-RA	AUR62010964-RA	AUR62019790-RA	AUR62009936-RA	AUR62013094-RA	AUR62009617-RA;AUR62001830-RA	AUR62011869-RA
AUR62024589-RA;AUR62024586-RA;AUR62024583-RA	AUR62008994-RA;AUR62008991-RA	AUR62014018-RA;AUR62005363-RA	AUR62041343-RA	AUR62042049-RA;AUR62038585-RA	AUR62009936-RA	AUR62011869-RA
AUR62032778-RA	AUR62028591-RA	AUR62003639-RA	AUR62015569-RA	AUR62023687-RA	AUR62038032-RA	AUR62011869-RA
AUR62009615-RA;AUR62001828-RA	AUR62009632-RA	AUR62029725-RA	AUR62012951-RA	AUR62041407-RA	AUR62020601-RA;AUR62009067-RA	AUR62011869-RA
AUR62023048-RA	AUR62030215-RA;AUR62027520-RA	AUR62041343-RA	AUR62009367-RA	AUR62041751-RA	AUR62039178-RA	AUR62011869-RA
AUR62033373-RA	AUR62022399-RA	AUR62026335-RA	AUR62033531-RA	AUR62037502-RA	AUR62007961-RA;AUR62003141-RA	AUR62011869-RA
AUR62012951-RA	AUR62031065-RA;AUR62026056-RA;AUR62024465-RA;AUR62008303-RA	AUR62020570-RA	AUR62016208-RA	AUR62021514-RA	AUR62029640-RA	AUR62011869-RA
AUR62015965-RA	AUR62021576-RA	AUR62021514-RA	AUR62026335-RA	AUR62006284-RA	AUR62043702-RA;AUR62041368-RA	AUR62011869-RA
AUR62040796-RA	AUR62020864-RA;AUR62018555-RA	AUR62023380-RA;AUR62013776-RA	AUR62038984-RA;AUR62036052-RA	AUR62043797-RA	AUR62028991-RA;AUR62025183-RA	AUR62011869-RA
AUR62041126-RA	AUR62038696-RA;AUR62038692-RA;AUR62036331-RA;AUR62032034-RA;AUR62019879-RA;AUR62019878-RA;AUR62018209-RA;AUR62018208-RA;AUR62015297-RA;AUR62009606-RA;AUR62007016-RA;AUR62001820-RA	AUR62024712-RA	AUR62008699-RA	AUR62039857-RA	AUR62021474-RA	AUR62011869-RA
AUR62012340-RA	AUR62027308-RA	AUR62036854-RA	AUR62019790-RA	AUR62033591-RA	AUR62026335-RA	AUR62011869-RA
AUR62044440-RA	AUR62041404-RA	AUR62007959-RA	AUR62023380-RA;AUR62013776-RA	AUR62038925-RA	AUR62032642-RA;AUR62026853-RA	AUR62011869-RA
AUR62040804-RA	AUR62011002-RA	AUR62036698-RA	AUR62003139-RA	AUR62013651-RA	AUR62027167-RA	AUR62011869-RA
AUR62026349-RA	AUR62036002-RA	AUR62031563-RA	AUR62031047-RA	AUR62039535-RA;AUR62014170-RA	AUR62020570-RA	AUR62011869-RA
AUR62007939-RA	AUR62018251-RA	AUR62027403-RA	AUR62023687-RA;AUR62002501-RA	AUR62011441-RA	AUR62040569-RA	AUR62011869-RA
AUR62042183-RA;AUR62042000-RA;AUR62040450-RA;AUR62024975-RA	AUR62027403-RA	AUR62033260-RA;AUR62021346-RA	AUR62038040-RA	AUR62021118-RA	AUR62019367-RA	AUR62011869-RA
AUR62038984-RA;AUR62036052-RA	AUR62036698-RA	AUR62021474-RA	AUR62020264-RA	AUR62007826-RA	AUR62040165-RA	AUR62011869-RA
AUR62037160-RA	AUR62037153-RA	AUR62023527-RA	AUR62031065-RA;AUR62026056-RA;AUR62024465-RA;AUR62008303-RA	AUR62009936-RA	AUR62004202-RA	AUR62011869-RA
AUR62024337-RA	AUR62039535-RA;AUR62014170-RA	AUR62028591-RA	AUR62029725-RA	AUR62019322-RA	AUR62008524-RA	AUR62011869-RA
AUR62024144-RA;AUR62005586-RA	AUR62006587-RA;AUR62000240-RA	AUR62025866-RA	AUR62013651-RA	AUR62016729-RA;AUR62011332-RA	AUR62016761-RA;AUR62011297-RA	AUR62011869-RA
AUR62020864-RA;AUR62018555-RA	AUR62021171-RA	AUR62037808-RA	AUR62016845-RA	AUR62040675-RA;AUR62036090-RA;AUR62019552-RA;AUR62015934-RA	AUR62040675-RA;AUR62036090-RA;AUR62019552-RA;AUR62015934-RA	AUR62011869-RA
AUR62015295-RA	AUR62030978-RA	AUR62010443-RA	AUR62030870-RA	AUR62009632-RA	AUR62001001-RA	AUR62011869-RA
AUR62004774-RA	AUR62027317-RA;AUR62007415-RA	AUR62012760-RA	AUR62017420-RA	AUR62038932-RA	AUR62042456-RA;AUR62034031-RA	AUR62011869-RA
AUR62043190-RA;AUR62019569-RA	AUR62026788-RA;AUR62013484-RA	AUR62031065-RA;AUR62026056-RA;AUR62024465-RA;AUR62008303-RA	AUR62021383-RA	AUR62001001-RA	AUR62035560-RA	AUR62011869-RA
AUR62041604-RA;AUR62040637-RA	AUR62025434-RA	AUR62003182-RA	AUR62035093-RA	AUR62027800-RA	AUR62028474-RA;AUR62006239-RA	AUR62011869-RA
AUR62037153-RA	AUR62033617-RA;AUR62032727-RA;AUR62028108-RA;AUR62005958-RA	AUR62037160-RA	AUR62037160-RA	AUR62013758-RA;AUR62013755-RA	AUR62020547-RA	AUR62011869-RA
AUR62035961-RA	AUR62026550-RA	AUR62013484-RA	AUR62025866-RA	AUR62024218-RA	AUR62040757-RA;AUR62040756-RA;AUR62033034-RA	AUR62011869-RA
AUR62035536-RA	AUR62043319-RA	AUR62037481-RA	AUR62040675-RA;AUR62036090-RA;AUR62019552-RA;AUR62015934-RA	AUR62039103-RA;AUR62010286-RA	AUR62005272-RA	AUR62011869-RA
AUR62035062-RA	AUR62032722-RA;AUR62032029-RA	AUR62020264-RA	AUR62035925-RA;AUR62035324-RA	AUR62021918-RA	AUR62038194-RA	AUR62011869-RA
AUR62033463-RA;AUR62011081-RA	AUR62032691-RA	AUR62009602-RA	AUR62038696-RA;AUR62038692-RA;AUR62036331-RA;AUR62032034-RA;AUR62019879-RA;AUR62019878-RA;AUR62018209-RA;AUR62018208-RA;AUR62015297-RA;AUR62009606-RA;AUR62007016-RA;AUR62001820-RA	AUR62021587-RA;AUR62008505-RA	AUR62044268-RA;AUR62008683-RA	AUR62011869-RA
AUR62029660-RA	AUR62038553-RA	AUR62021363-RA	AUR62021171-RA	AUR62043309-RA;AUR62032217-RA	AUR62016729-RA;AUR62011332-RA	AUR62011869-RA
AUR62026335-RA	AUR62016184-RA	AUR62018598-RA	AUR62025678-RA	AUR62039595-RA	AUR62033591-RA	AUR62011869-RA
AUR62016335-RA	AUR62019040-RA	AUR62020864-RA;AUR62018555-RA	AUR62020570-RA	AUR62019367-RA	AUR62015657-RA	AUR62011869-RA
AUR62003407-RA	AUR62040675-RA;AUR62036090-RA;AUR62019552-RA;AUR62015934-RA	AUR62005728-RA	AUR62040804-RA;AUR62036854-RA	AUR62040272-RA	AUR62041482-RA;AUR62040542-RA	AUR62035617-RA
AUR62041817-RA;AUR62039481-RA	AUR62030233-RA;AUR62028806-RA;AUR62027613-RA;AUR62005753-RA	AUR62040213-RA	AUR62028591-RA	AUR62017391-RA	AUR62019473-RA	AUR62035617-RA
AUR62032525-RA	AUR62038984-RA;AUR62036052-RA	AUR62032691-RA;AUR62032053-RA	AUR62035782-RA;AUR62035779-RA;AUR62035776-RA;AUR62027580-RA;AUR62027577-RA	AUR62029572-RA	AUR62038925-RA	AUR62035617-RA
AUR62030627-RA;AUR62024917-RA	AUR62015657-RA	AUR62037900-RA	AUR62036970-RA	AUR62020080-RA	AUR62030151-RA;AUR62030147-RA;AUR62002691-RA;AUR62002690-RA	AUR62035617-RA
AUR62007959-RA	AUR62043580-RA;AUR62036140-RA;AUR62036139-RA;AUR62036137-RA;AUR62026722-RA;AUR62026721-RA;AUR62019499-RA;AUR62019497-RA;AUR62019495-RA;AUR62019258-RA;AUR62013570-RA;AUR62000086-RA	AUR62023687-RA;AUR62002501-RA	AUR62031370-RA	AUR62037907-RA	AUR62013976-RA;AUR62005328-RA	AUR62035617-RA
AUR62039857-RA	AUR62006212-RA	AUR62043538-RA	AUR62037900-RA	AUR62002379-RA	AUR62025726-RA	AUR62035617-RA
AUR62021926-RA;AUR62012728-RA	AUR62016208-RA	AUR62016184-RA	AUR62006589-RA	AUR62027308-RA	AUR62000673-RA	AUR62035617-RA
AUR62021558-RA;AUR62008532-RA	AUR62038932-RA	AUR62029818-RA	AUR62028576-RA	AUR62023775-RA;AUR62002414-RA	AUR62012217-RA;AUR62012175-RA	AUR62035617-RA
AUR62020167-RA;AUR62001613-RA	AUR62005026-RA	AUR62027800-RA	AUR62039857-RA	AUR62013681-RA	AUR62026484-RA	AUR62035617-RA
AUR62016761-RA;AUR62011297-RA	AUR62037914-RA	AUR62007112-RA	AUR62002451-RA	AUR62019606-RA	AUR62007408-RA	AUR62035617-RA
AUR62018510-RA	AUR62029574-RA	AUR62029574-RA	AUR62037657-RA	AUR62037914-RA	AUR62015569-RA	AUR62035617-RA
AUR62014945-RA	AUR62020264-RA	AUR62012951-RA	AUR62017183-RA	AUR62001811-RA	AUR62025749-RA	AUR62035617-RA
AUR62029726-RA	AUR62016372-RA;AUR62011552-RA	AUR62008699-RA	AUR62037481-RA;AUR62004771-RA	AUR62017949-RA;AUR62003639-RA	AUR62020441-RA	AUR62035617-RA
AUR62002243-RA	AUR62020080-RA	AUR62035782-RA;AUR62035779-RA;AUR62035776-RA;AUR62027580-RA;AUR62027577-RA	AUR62027317-RA;AUR62007415-RA	AUR62017860-RA	AUR62030674-RA;AUR62024874-RA	AUR62035617-RA
	AUR62023048-RA	AUR62019654-RA;AUR62013959-RA	AUR62001816-RA	AUR62001589-RA	AUR62041657-RA;AUR62035536-RA	AUR62035617-RA
	AUR62043233-RA;AUR62007654-RA	AUR62039867-RA	AUR62010443-RA	AUR62031519-RA	AUR62022858-RA	AUR62035617-RA
	AUR62017458-RA	AUR62042183-RA;AUR62042000-RA;AUR62040450-RA;AUR62024975-RA	AUR62025900-RA	AUR62025559-RA	AUR62009520-RA;AUR62009519-RA	AUR62035617-RA
	AUR62031439-RA	AUR62038553-RA	AUR62030233-RA;AUR62028806-RA;AUR62027613-RA;AUR62005753-RA	AUR62030215-RA;AUR62027520-RA	AUR62020213-RA	AUR62035617-RA
	AUR62040804-RA;AUR62036854-RA	AUR62029688-RA	AUR62041673-RA	AUR62014498-RA	AUR62023775-RA;AUR62002414-RA	AUR62035617-RA
	AUR62013651-RA	AUR62006212-RA	AUR62007112-RA	AUR62000476-RA	AUR62021514-RA	AUR62035617-RA
	AUR62006284-RA	AUR62033638-RA	AUR62021576-RA;AUR62008514-RA	AUR62010964-RA	AUR62023687-RA	AUR62035617-RA
	AUR62038855-RA;AUR62029587-RA	AUR62027317-RA;AUR62007415-RA	AUR62032740-RA;AUR62015295-RA	AUR62031065-RA;AUR62008303-RA	AUR62036016-RA;AUR62027896-RA	AUR62035617-RA
	AUR62038869-RA	AUR62006113-RA	AUR62021910-RA;AUR62012748-RA	AUR62024874-RA	AUR62015925-RA	AUR62035617-RA
	AUR62031047-RA;AUR62008284-RA	AUR62036002-RA	AUR62022399-RA	AUR62040700-RA	AUR62024712-RA	AUR62035617-RA
	AUR62009679-RA;AUR62006520-RA;AUR62001883-RA	AUR62031879-RA	AUR62036698-RA	AUR62000179-RA	AUR62037008-RA;AUR62035594-RA;AUR62006210-RA;AUR62006032-RA	AUR62035617-RA
	AUR62031370-RA	AUR62021251-RA	AUR62040244-RA;AUR62004002-RA	AUR62036394-RA;AUR62024005-RA	AUR62029818-RA	AUR62035617-RA
	AUR62008524-RA	AUR62021587-RA;AUR62008505-RA	AUR62043233-RA;AUR62007654-RA	AUR62036097-RA	AUR62017532-RA;AUR62015075-RA	AUR62035617-RA
	AUR62001746-RA	AUR62022858-RA	AUR62012226-RA	AUR62005211-RA	AUR62042366-RA;AUR62037104-RA	AUR62035617-RA
	AUR62019473-RA	AUR62030675-RA;AUR62024873-RA	AUR62029688-RA	AUR62030790-RA	AUR62014057-RA;AUR62005395-RA	AUR62035617-RA
	AUR62043797-RA;AUR62040327-RA	AUR62030674-RA;AUR62024874-RA	AUR62005903-RA	AUR62009520-RA;AUR62009519-RA	AUR62041751-RA	AUR62035617-RA
	AUR62025909-RA	AUR62019279-RA;AUR62000102-RA	AUR62022235-RA	AUR62036970-RA	AUR62005211-RA	AUR62035617-RA
	AUR62041673-RA	AUR62036769-RA;AUR62013836-RA	AUR62001001-RA	AUR62013840-RA	AUR62004702-RA	AUR62035617-RA
	AUR62038844-RA	AUR62025559-RA	AUR62037594-RA	AUR62011027-RA	AUR62020865-RA;AUR62018554-RA	AUR62035617-RA
	AUR62004999-RA	AUR62026550-RA	AUR62041751-RA	AUR62039178-RA	AUR62030790-RA	AUR62035617-RA
	AUR62042183-RA;AUR62042000-RA;AUR62040450-RA;AUR62024975-RA	AUR62030870-RA;AUR62027027-RA	AUR62002379-RA	AUR62009367-RA	AUR62031576-RA	AUR62035617-RA
	AUR62013094-RA	AUR62017693-RA	AUR62042049-RA	AUR62037008-RA;AUR62035594-RA;AUR62006210-RA;AUR62006032-RA	AUR62016444-RA	AUR62035617-RA
	AUR62030224-RA	AUR62041482-RA;AUR62040542-RA	AUR62004999-RA	AUR62041482-RA;AUR62040542-RA	AUR62032217-RA	AUR62035617-RA
	AUR62040159-RA	AUR62031519-RA	AUR62024337-RA;AUR62012075-RA	AUR62037594-RA	AUR62032014-RA	AUR62032318-RA
	AUR62029730-RA;AUR62006390-RA	AUR62028544-RA	AUR62027800-RA	AUR62031047-RA	AUR62022079-RA;AUR62001251-RA	AUR62032318-RA
	AUR62001293-RA	AUR62038696-RA;AUR62038692-RA;AUR62036331-RA;AUR62032034-RA;AUR62030687-RA;AUR62019879-RA;AUR62019878-RA;AUR62018209-RA;AUR62018208-RA;AUR62015297-RA;AUR62009606-RA;AUR62007016-RA;AUR62001820-RA	AUR62035262-RA;AUR62002903-RA	AUR62008524-RA	AUR62023299-RA	AUR62032318-RA
	AUR62020213-RA	AUR62019040-RA	AUR62043834-RA;AUR62029487-RA	AUR62039661-RA	AUR62037172-RA	AUR62032318-RA
	AUR62019534-RA	AUR62012217-RA	AUR62040437-RA;AUR62024048-RA	AUR62016444-RA	AUR62027210-RA;AUR62019146-RA;AUR62014409-RA;AUR62003258-RA	AUR62032318-RA
	AUR62004958-RA	AUR62031639-RA	AUR62036002-RA	AUR62030151-RA;AUR62030147-RA;AUR62002691-RA;AUR62002690-RA	AUR62043105-RA	AUR62032318-RA
	AUR62030011-RA	AUR62032740-RA	AUR62033617-RA;AUR62032727-RA;AUR62028108-RA;AUR62005958-RA	AUR62031316-RA	AUR62033769-RA;AUR62029935-RA	AUR62032318-RA
	AUR62042041-RA;AUR62038571-RA	AUR62016726-RA;AUR62011335-RA	AUR62028267-RA;AUR62025264-RA	AUR62008369-RA	AUR62040441-RA	AUR62032318-RA
	AUR62037900-RA	AUR62032651-RA	AUR62009632-RA	AUR62025011-RA	AUR62029720-RA	AUR62032318-RA
	AUR62025559-RA	AUR62025417-RA;AUR62008824-RA	AUR62040569-RA	AUR62042183-RA;AUR62042000-RA;AUR62040450-RA;AUR62024975-RA	AUR62037435-RA	AUR62032318-RA
	AUR62013646-RA	AUR62022907-RA;AUR62012270-RA	AUR62019040-RA	AUR62029730-RA;AUR62006390-RA	AUR62031501-RA;AUR62012405-RA	AUR62032318-RA
	AUR62023775-RA;AUR62002414-RA	AUR62016705-RA;AUR62011357-RA	AUR62016760-RA;AUR62011298-RA	AUR62022858-RA	AUR62014529-RA	AUR62032318-RA
	AUR62036016-RA;AUR62027896-RA	AUR62021910-RA;AUR62012748-RA	AUR62009679-RA;AUR62006520-RA;AUR62001883-RA	AUR62018495-RA	AUR62014323-RA	AUR62032318-RA
	AUR62016760-RA	AUR62031370-RA	AUR62032572-RA;AUR62031691-RA	AUR62016175-RA	AUR62033399-RA	AUR62032318-RA
	AUR62025925-RA	AUR62021730-RA	AUR62014018-RA;AUR62005363-RA	AUR62010266-RA	AUR62037594-RA	AUR62032318-RA
	AUR62042038-RA;AUR62033079-RA	AUR62001843-RA	AUR62015315-RA;AUR62012017-RA	AUR62006212-RA	AUR62025559-RA	AUR62032318-RA
	AUR62016444-RA	AUR62013646-RA	AUR62021226-RA;AUR62016021-RA	AUR62007408-RA	AUR62042183-RA;AUR62042000-RA;AUR62040450-RA;AUR62024975-RA	AUR62032318-RA
	AUR62021400-RA	AUR62007939-RA	AUR62006212-RA	AUR62027317-RA;AUR62007415-RA	AUR62030224-RA;AUR62027526-RA	AUR62032318-RA
	AUR62005148-RA;AUR62004044-RA;AUR62000825-RA	AUR62038925-RA	AUR62034441-RA	AUR62035593-RA	AUR62030308-RA	AUR62032318-RA
	AUR62033530-RA	AUR62026666-RA	AUR62036394-RA;AUR62024005-RA	AUR62020851-RA	AUR62009783-RA	AUR62032318-RA
	AUR62006386-RA	AUR62013651-RA	AUR62003352-RA	AUR62016509-RA	AUR62042127-RA;AUR62040976-RA;AUR62009620-RA	AUR62032318-RA
	AUR62021910-RA;AUR62012748-RA	AUR62040159-RA	AUR62044622-RA;AUR62044196-RA;AUR62044195-RA;AUR62040858-RA;AUR62026160-RA;AUR62026159-RA;AUR62026157-RA	AUR62037104-RA	AUR62032333-RA;AUR62028608-RA;AUR62023978-RA	AUR62032318-RA
	AUR62041490-RA;AUR62037657-RA	AUR62039857-RA	AUR62043580-RA;AUR62036140-RA;AUR62036139-RA;AUR62036137-RA;AUR62026722-RA;AUR62026721-RA;AUR62019499-RA;AUR62019497-RA;AUR62019495-RA;AUR62019258-RA;AUR62013570-RA;AUR62000086-RA	AUR62005026-RA;AUR62000941-RA	AUR62029730-RA;AUR62006390-RA	AUR62032318-RA
	AUR62030465-RA;AUR62010449-RA	AUR62029730-RA;AUR62006390-RA	AUR62006284-RA	AUR62039925-RA	AUR62032240-RA;AUR62011924-RA	AUR62032318-RA
	AUR62007826-RA;AUR62003022-RA	AUR62009367-RA	AUR62023775-RA;AUR62002414-RA	AUR62036159-RA	AUR62040749-RA	AUR62032318-RA
	AUR62029688-RA	AUR62007961-RA;AUR62003141-RA	AUR62033769-RA;AUR62029935-RA	AUR62015657-RA	AUR62006799-RA	AUR62032318-RA
	AUR62037160-RA	AUR62006210-RA	AUR62039103-RA;AUR62010286-RA	AUR62016845-RA	AUR62029452-RA	AUR62032318-RA
	AUR62021587-RA;AUR62008505-RA	AUR62030151-RA;AUR62030147-RA;AUR62002691-RA;AUR62002690-RA	AUR62030675-RA;AUR62024873-RA	AUR62035560-RA	AUR62001589-RA	AUR62032318-RA
	AUR62030674-RA;AUR62024874-RA	AUR62005030-RA	AUR62037104-RA	AUR62020213-RA	AUR62037900-RA	AUR62032318-RA
	AUR62014018-RA;AUR62005363-RA	AUR62004958-RA	AUR62042183-RA;AUR62042000-RA;AUR62040450-RA;AUR62024975-RA	AUR62014529-RA;AUR62008976-RA	AUR62002900-RA	AUR62032318-RA
	AUR62033638-RA	AUR62004241-RA	AUR62007354-RA	AUR62031501-RA;AUR62012405-RA	AUR62019209-RA;AUR62000039-RA	AUR62032318-RA
	AUR62041371-RA	AUR62021576-RA;AUR62008514-RA	AUR62009508-RA	AUR62032691-RA;AUR62032053-RA	AUR62030892-RA;AUR62027049-RA	AUR62032318-RA
	AUR62041482-RA;AUR62040542-RA	AUR62001293-RA	AUR62039595-RA	AUR62023737-RA	AUR62008609-RA	AUR62032318-RA
	AUR62002243-RA	AUR62024981-RA	AUR62035123-RA	AUR62023568-RA	AUR62030284-RA;AUR62020068-RA;AUR62018378-RA;AUR62017240-RA;AUR62010597-RA;AUR62006568-RA;AUR62001712-RA;AUR62000222-RA	AUR62032318-RA
	AUR62021118-RA	AUR62024337-RA	AUR62036769-RA;AUR62013836-RA	AUR62033531-RA	AUR62033478-RA	AUR62032318-RA
	AUR62028474-RA;AUR62006239-RA	AUR62015657-RA	AUR62041904-RA;AUR62033900-RA;AUR62030284-RA;AUR62018378-RA;AUR62006568-RA;AUR62000222-RA	AUR62027103-RA	AUR62035089-RA;AUR62016172-RA	AUR62032318-RA
	AUR62007959-RA	AUR62007559-RA;AUR62005148-RA;AUR62004044-RA;AUR62000825-RA	AUR62037808-RA	AUR62001164-RA	AUR62029723-RA	AUR62032318-RA
	AUR62024337-RA	AUR62044622-RA;AUR62044196-RA;AUR62044195-RA;AUR62040858-RA;AUR62026160-RA;AUR62026159-RA;AUR62026157-RA	AUR62032963-RA	AUR62040969-RA	AUR62032517-RA;AUR62017449-RA	AUR62032318-RA
	AUR62029660-RA	AUR62002243-RA	AUR62017578-RA	AUR62004202-RA	AUR62029656-RA;AUR62025900-RA	AUR62032318-RA
	AUR62035048-RA	AUR62038844-RA	AUR62034376-RA	AUR62005903-RA	AUR62017037-RA	AUR62032318-RA
	AUR62024589-RA;AUR62024586-RA;AUR62024583-RA	AUR62030776-RA;AUR62030516-RA	AUR62028544-RA	AUR62026335-RA	AUR62039103-RA;AUR62010286-RA	AUR62032318-RA
	AUR62043834-RA;AUR62029487-RA	AUR62030803-RA	AUR62021251-RA	AUR62036893-RA	AUR62019322-RA	AUR62032929-RA
	AUR62026523-RA;AUR62026324-RA	AUR62043617-RA;AUR62029669-RA;AUR62009316-RA	AUR62038844-RA	AUR62019209-RA;AUR62000039-RA	AUR62009367-RA	AUR62032929-RA
	AUR62041929-RA;AUR62029656-RA;AUR62025900-RA	AUR62009679-RA;AUR62006520-RA;AUR62001883-RA	AUR62013646-RA	AUR62023299-RA;AUR62009003-RA	AUR62027912-RA;AUR62027911-RA;AUR62024985-RA;AUR62024984-RA;AUR62020794-RA;AUR62020793-RA;AUR62014231-RA;AUR62004917-RA	AUR62032929-RA
	AUR62038925-RA	AUR62019209-RA	AUR62040757-RA;AUR62040756-RA;AUR62033034-RA	AUR62029720-RA	AUR62037907-RA	AUR62032929-RA
	AUR62006384-RA	AUR62026523-RA	AUR62042746-RA;AUR62018572-RA;AUR62017559-RA;AUR62015098-RA;AUR62004257-RA	AUR62033617-RA;AUR62032727-RA;AUR62028108-RA;AUR62005958-RA	AUR62006927-RA;AUR62000573-RA	AUR62032929-RA
	AUR62030870-RA	AUR62037884-RA	AUR62023862-RA	AUR62025909-RA	AUR62016335-RA	AUR62032929-RA
	AUR62037782-RA	AUR62021118-RA	AUR62031519-RA	AUR62030870-RA;AUR62027027-RA	AUR62019028-RA	AUR62032929-RA
	AUR62021897-RA	AUR62021210-RA;AUR62016002-RA	AUR62009549-RA	AUR62042443-RA;AUR62009263-RA	AUR62029423-RA	AUR62032929-RA
	AUR62029818-RA	AUR62016444-RA	AUR62042041-RA	AUR62027210-RA;AUR62019146-RA;AUR62014409-RA;AUR62003258-RA	AUR62043797-RA	AUR62032929-RA
	AUR62021383-RA	AUR62016760-RA;AUR62011298-RA	AUR62016220-RA	AUR62034007-RA;AUR62027474-RA	AUR62042049-RA;AUR62038585-RA	AUR62032929-RA
	AUR62006523-RA	AUR62033531-RA	AUR62043617-RA	AUR62015568-RA;AUR62002140-RA	AUR62020851-RA	AUR62032929-RA
	AUR62021730-RA	AUR62019473-RA	AUR62026523-RA;AUR62026324-RA	AUR62016761-RA;AUR62011297-RA	AUR62038844-RA	AUR62032929-RA
	AUR62037808-RA	AUR62028474-RA;AUR62006239-RA	AUR62029475-RA;AUR62003361-RA	AUR62033546-RA	AUR62006817-RA	AUR62032929-RA
	AUR62022923-RA	AUR62033617-RA;AUR62032727-RA;AUR62028108-RA;AUR62005958-RA	AUR62007961-RA;AUR62003141-RA	AUR62016604-RA;AUR62011453-RA	AUR62027484-RA	AUR62032929-RA
	AUR62019117-RA;AUR62014375-RA	AUR62027210-RA;AUR62019146-RA;AUR62014409-RA;AUR62003258-RA	AUR62036284-RA;AUR62028358-RA;AUR62028357-RA;AUR62025357-RA;AUR62010739-RA;AUR62010736-RA	AUR62016506-RA	AUR62023749-RA;AUR62002438-RA	AUR62032929-RA
	AUR62020160-RA	AUR62034235-RA;AUR62029354-RA	AUR62006309-RA	AUR62014503-RA	AUR62005277-RA;AUR62000676-RA	AUR62032929-RA
	AUR62035536-RA	AUR62018504-RA	AUR62007408-RA	AUR62042746-RA;AUR62018572-RA;AUR62017559-RA;AUR62015098-RA;AUR62004257-RA	AUR62031439-RA	AUR62032929-RA
	AUR62022858-RA	AUR62004999-RA	AUR62009096-RA	AUR62023263-RA	AUR62027179-RA;AUR62003286-RA	AUR62032929-RA
	AUR62028167-RA;AUR62005903-RA	AUR62041404-RA	AUR62009302-RA	AUR62024994-RA	AUR62023689-RA;AUR62002497-RA	AUR62032929-RA
	AUR62025417-RA;AUR62008824-RA	AUR62038013-RA	AUR62015004-RA	AUR62030510-RA	AUR62039829-RA	AUR62032929-RA
	AUR62018598-RA	AUR62015315-RA;AUR62012017-RA	AUR62022907-RA;AUR62012270-RA	AUR62015115-RA	AUR62028544-RA	AUR62032929-RA
	AUR62011924-RA	AUR62003780-RA	AUR62019473-RA	AUR62042038-RA;AUR62033079-RA	AUR62014053-RA	AUR62032929-RA
	AUR62034235-RA;AUR62029354-RA	AUR62030236-RA	AUR62034724-RA;AUR62033663-RA;AUR62018258-RA	AUR62023380-RA;AUR62013776-RA	AUR62035782-RA;AUR62035779-RA;AUR62035776-RA;AUR62027580-RA;AUR62027577-RA	AUR62032929-RA
	AUR62027857-RA;AUR62019015-RA	AUR62038764-RA;AUR62009044-RA	AUR62005148-RA;AUR62004044-RA;AUR62000825-RA	AUR62041371-RA	AUR62019116-RA;AUR62014374-RA	AUR62032929-RA
	AUR62023749-RA;AUR62002438-RA	AUR62031145-RA	AUR62024227-RA;AUR62005515-RA	AUR62016949-RA;AUR62016755-RA	AUR62042746-RA;AUR62018572-RA;AUR62017559-RA;AUR62015098-RA;AUR62004257-RA	AUR62032929-RA
	AUR62016506-RA	AUR62042038-RA	AUR62024874-RA	AUR62040757-RA;AUR62040756-RA;AUR62033034-RA	AUR62008327-RA	AUR62032929-RA
	AUR62010510-RA	AUR62034768-RA;AUR62009520-RA;AUR62009519-RA	AUR62032862-RA	AUR62020864-RA;AUR62018555-RA	AUR62000638-RA	AUR62032929-RA
	AUR62009427-RA	AUR62037914-RA	AUR62029423-RA;AUR62021161-RA;AUR62003418-RA	AUR62021251-RA;AUR62016045-RA	AUR62005903-RA	AUR62032929-RA
	AUR62035262-RA;AUR62002903-RA	AUR62007936-RA	AUR62028474-RA;AUR62006239-RA	AUR62029198-RA;AUR62014943-RA	AUR62035062-RA	AUR62032929-RA
	AUR62010320-RA	AUR62021383-RA	AUR62016372-RA;AUR62011552-RA	AUR62035536-RA	AUR62011681-RA	AUR62032929-RA
	AUR62040437-RA;AUR62024048-RA	AUR62018251-RA	AUR62040700-RA	AUR62037160-RA	AUR62033530-RA	AUR62002139-RA
	AUR62035123-RA	AUR62033530-RA	AUR62033591-RA	AUR62008609-RA	AUR62030921-RA	AUR62002139-RA
	AUR62008724-RA	AUR62041536-RA	AUR62032397-RA	AUR62037435-RA	AUR62005026-RA	AUR62002139-RA
	AUR62036284-RA;AUR62028358-RA;AUR62028357-RA;AUR62025357-RA;AUR62010739-RA;AUR62010736-RA	AUR62027484-RA	AUR62016949-RA;AUR62016755-RA	AUR62000966-RA	AUR62003790-RA	AUR62002139-RA
	AUR62030790-RA	AUR62029656-RA;AUR62025900-RA	AUR62037008-RA;AUR62035594-RA;AUR62006210-RA;AUR62006032-RA	AUR62039740-RA	AUR62027308-RA	AUR62002139-RA
	AUR62019209-RA;AUR62000039-RA	AUR62023167-RA;AUR62009489-RA	AUR62010480-RA	AUR62035028-RA	AUR62020618-RA	AUR62002139-RA
	AUR62008699-RA	AUR62006589-RA;AUR62000243-RA	AUR62010320-RA	AUR62013976-RA;AUR62005328-RA	AUR62030510-RA	AUR62002139-RA
	AUR62006617-RA;AUR62000269-RA	AUR62015004-RA	AUR62030151-RA;AUR62030147-RA;AUR62002691-RA;AUR62002690-RA	AUR62014323-RA	AUR62002570-RA	AUR62002139-RA
	AUR62043309-RA;AUR62032217-RA	AUR62010425-RA	AUR62044321-RA;AUR62043485-RA;AUR62025522-RA;AUR62008713-RA	AUR62005134-RA	AUR62006523-RA	AUR62002139-RA
	AUR62015315-RA;AUR62012017-RA	AUR62035560-RA	AUR62021869-RA	AUR62006386-RA	AUR62020080-RA	AUR62002139-RA
	AUR62033531-RA	AUR62022235-RA	AUR62035092-RA;AUR62025452-RA;AUR62016174-RA;AUR62008786-RA	AUR62014375-RA	AUR62036448-RA;AUR62036408-RA	AUR62002139-RA
	AUR62041751-RA	AUR62043309-RA	AUR62042762-RA;AUR62042468-RA	AUR62005360-RA	AUR62036394-RA;AUR62024005-RA	AUR62002139-RA
	AUR62040213-RA	AUR62040441-RA;AUR62024050-RA	AUR62005605-RA	AUR62025417-RA;AUR62008824-RA	AUR62030785-RA;AUR62030508-RA	AUR62002139-RA
	AUR62032963-RA	AUR62006009-RA	AUR62018598-RA	AUR62019040-RA	AUR62012951-RA	AUR62002139-RA
	AUR62031563-RA;AUR62012439-RA	AUR62020185-RA	AUR62013630-RA;AUR62004218-RA	AUR62037829-RA	AUR62043759-RA;AUR62039931-RA	AUR62002139-RA
	AUR62020167-RA;AUR62001613-RA	AUR62006386-RA	AUR62020167-RA;AUR62001613-RA	AUR62035048-RA	AUR62035557-RA;AUR62006069-RA	AUR62002139-RA
	AUR62026666-RA	AUR62043233-RA;AUR62007654-RA	AUR62016184-RA	AUR62021226-RA;AUR62016021-RA	AUR62031563-RA	AUR62002139-RA
	AUR62002379-RA	AUR62039103-RA;AUR62010286-RA	AUR62032217-RA	AUR62032240-RA;AUR62011924-RA	AUR62025561-RA	AUR62002139-RA
	AUR62019845-RA;AUR62010846-RA	AUR62035536-RA	AUR62021097-RA	AUR62030921-RA	AUR62013758-RA;AUR62013755-RA	AUR62002139-RA
	AUR62007591-RA;AUR62004079-RA	AUR62027474-RA	AUR62016444-RA	AUR62038844-RA	AUR62013614-RA;AUR62004234-RA	AUR62002139-RA
	AUR62016797-RA;AUR62010424-RA	AUR62017578-RA	AUR62019279-RA;AUR62000102-RA	AUR62032620-RA;AUR62031735-RA	AUR62038273-RA;AUR62003961-RA	AUR62002139-RA
	AUR62030675-RA;AUR62024873-RA	AUR62034376-RA;AUR62022318-RA	AUR62007826-RA	AUR62022970-RA	AUR62031519-RA	AUR62002139-RA
	AUR62030803-RA	AUR62032240-RA;AUR62011924-RA	AUR62038678-RA;AUR62021587-RA;AUR62018191-RA;AUR62008505-RA	AUR62022975-RA;AUR62012333-RA	AUR62021710-RA;AUR62008389-RA	AUR62002139-RA
	AUR62037008-RA;AUR62035594-RA;AUR62006210-RA;AUR62006032-RA	AUR62020213-RA	AUR62016509-RA	AUR62003790-RA	AUR62018495-RA	AUR62002139-RA
	AUR62040700-RA	AUR62010510-RA	AUR62024218-RA	AUR62021845-RA	AUR62016773-RA;AUR62013343-RA;AUR62011285-RA;AUR62011144-RA	AUR62002139-RA
	AUR62015295-RA	AUR62010266-RA	AUR62026550-RA	AUR62029746-RA;AUR62006403-RA	AUR62012808-RA	AUR62002139-RA
	AUR62024144-RA;AUR62005586-RA	AUR62016845-RA	AUR62036969-RA	AUR62015315-RA;AUR62012017-RA	AUR62034535-RA	AUR62002139-RA
	AUR62024218-RA	AUR62031441-RA	AUR62027094-RA	AUR62027865-RA	AUR62036457-RA;AUR62017103-RA	AUR62002139-RA
	AUR62023737-RA;AUR62002451-RA	AUR62036899-RA;AUR62013819-RA	AUR62030181-RA;AUR62002731-RA;AUR62002730-RA	AUR62039001-RA	AUR62006386-RA	AUR62032931-RA
	AUR62019322-RA	AUR62037594-RA	AUR62037040-RA;AUR62006270-RA	AUR62030233-RA;AUR62028806-RA;AUR62027613-RA;AUR62005753-RA	AUR62027317-RA;AUR62007415-RA	AUR62032931-RA
	AUR62037104-RA	AUR62040244-RA;AUR62004002-RA	AUR62015435-RA	AUR62035089-RA;AUR62016172-RA	AUR62016740-RA;AUR62011317-RA	AUR62032931-RA
	AUR62016761-RA;AUR62011297-RA	AUR62007408-RA	AUR62005245-RA;AUR62000719-RA	AUR62025915-RA	AUR62036899-RA;AUR62026355-RA;AUR62013819-RA;AUR62006309-RA	AUR62032931-RA
	AUR62021251-RA;AUR62016045-RA	AUR62013094-RA	AUR62019117-RA;AUR62019116-RA;AUR62014375-RA;AUR62014374-RA	AUR62034235-RA;AUR62029354-RA	AUR62025951-RA	AUR62032931-RA
	AUR62006286-RA	AUR62008609-RA	AUR62025011-RA	AUR62017264-RA;AUR62010620-RA	AUR62009602-RA	AUR62032931-RA
	AUR62009302-RA	AUR62000673-RA	AUR62005134-RA	AUR62043233-RA;AUR62007654-RA	AUR62005192-RA;AUR62000777-RA	AUR62032931-RA
	AUR62037884-RA	AUR62027860-RA;AUR62019023-RA	AUR62028627-RA;AUR62008052-RA	AUR62027167-RA;AUR62003295-RA	AUR62042443-RA;AUR62009263-RA	AUR62032931-RA
	AUR62007961-RA	AUR62031501-RA;AUR62012405-RA	AUR62006386-RA	AUR62026484-RA	AUR62007939-RA	AUR62032931-RA
	AUR62040244-RA;AUR62004002-RA	AUR62006123-RA	AUR62035536-RA	AUR62030236-RA	AUR62010425-RA	AUR62032931-RA
	AUR62009904-RA	AUR62039633-RA	AUR62023966-RA	AUR62006382-RA	AUR62020160-RA	AUR62032931-RA
	AUR62016509-RA	AUR62023775-RA;AUR62002414-RA	AUR62019654-RA;AUR62013959-RA	AUR62016760-RA;AUR62011298-RA	AUR62017860-RA	AUR62032931-RA
	AUR62042474-RA;AUR62038889-RA	AUR62025925-RA	AUR62010266-RA	AUR62029723-RA	AUR62036002-RA	AUR62032931-RA
	AUR62013959-RA	AUR62040437-RA;AUR62024048-RA	AUR62029730-RA;AUR62006390-RA	AUR62031439-RA	AUR62017949-RA	AUR62032931-RA
	AUR62039595-RA	AUR62035062-RA	AUR62009615-RA;AUR62001828-RA	AUR62032547-RA;AUR62031661-RA	AUR62030215-RA;AUR62027520-RA	AUR62032931-RA
	AUR62012737-RA	AUR62042746-RA;AUR62018572-RA;AUR62017559-RA;AUR62015098-RA;AUR62004257-RA	AUR62002243-RA	AUR62041673-RA;AUR62033853-RA	AUR62029198-RA;AUR62014943-RA	AUR62032931-RA
	AUR62037830-RA	AUR62002570-RA	AUR62034235-RA;AUR62029354-RA	AUR62040796-RA;AUR62036860-RA	AUR62028824-RA	AUR62032931-RA
	AUR62040617-RA;AUR62040144-RA	AUR62043797-RA;AUR62040327-RA	AUR62025434-RA	AUR62020160-RA	AUR62024208-RA;AUR62005529-RA	AUR62032931-RA
	AUR62037594-RA	AUR62016506-RA	AUR62016506-RA	AUR62029688-RA	AUR62004807-RA	AUR62032931-RA
	AUR62006817-RA;AUR62000476-RA	AUR62041751-RA	AUR62022174-RA	AUR62043617-RA;AUR62029669-RA;AUR62009316-RA	AUR62036970-RA	AUR62032931-RA
	AUR62034376-RA;AUR62022318-RA	AUR62010320-RA	AUR62030803-RA	AUR62031563-RA;AUR62012439-RA	AUR62044431-RA;AUR62026662-RA	AUR62032931-RA
	AUR62026355-RA;AUR62006309-RA	AUR62040817-RA;AUR62035123-RA	AUR62039979-RA	AUR62012986-RA;AUR62009998-RA	AUR62001811-RA	AUR62032931-RA
	AUR62031519-RA	AUR62020459-RA;AUR62015756-RA	AUR62025417-RA;AUR62008824-RA	AUR62036135-RA;AUR62019503-RA	AUR62021210-RA;AUR62016002-RA	AUR62032931-RA
	AUR62022970-RA;AUR62012328-RA	AUR62041408-RA;AUR62024665-RA;AUR62016134-RA;AUR62011821-RA;AUR62005277-RA;AUR62000676-RA	AUR62042038-RA;AUR62033079-RA	AUR62040437-RA;AUR62024048-RA	AUR62021766-RA;AUR62008333-RA	AUR62032931-RA
	AUR62027167-RA	AUR62032373-RA	AUR62037914-RA	AUR62030224-RA;AUR62027526-RA	AUR62044500-RA;AUR62044340-RA	AUR62032931-RA
	AUR62020575-RA;AUR62009096-RA	AUR62042443-RA;AUR62009263-RA	AUR62006113-RA	AUR62025925-RA	AUR62020264-RA	AUR62032931-RA
	AUR62005272-RA;AUR62000684-RA	AUR62036085-RA	AUR62006403-RA	AUR62014053-RA	AUR62037160-RA	AUR62032931-RA
	AUR62007936-RA	AUR62032333-RA;AUR62028608-RA;AUR62023978-RA	AUR62017391-RA	AUR62012217-RA	AUR62029634-RA;AUR62025925-RA;AUR62005605-RA	AUR62032931-RA
	AUR62039867-RA	AUR62013896-RA	AUR62024981-RA	AUR62005865-RA	AUR62000266-RA	AUR62032931-RA
	AUR62028544-RA	AUR62033398-RA	AUR62006617-RA;AUR62000269-RA	AUR62030785-RA;AUR62030508-RA	AUR62001843-RA	AUR62032931-RA
	AUR62022235-RA	AUR62024355-RA	AUR62023381-RA;AUR62013775-RA	AUR62028474-RA;AUR62006239-RA	AUR62020185-RA	AUR62032931-RA
	AUR62016729-RA;AUR62011332-RA	AUR62027741-RA;AUR62018907-RA	AUR62032620-RA;AUR62031735-RA	AUR62038984-RA;AUR62036052-RA	AUR62038339-RA	AUR62032931-RA
	AUR62007473-RA	AUR62039829-RA;AUR62000179-RA	AUR62007939-RA	AUR62022399-RA	AUR62017391-RA	AUR62032931-RA
	AUR62035092-RA;AUR62025452-RA;AUR62016174-RA;AUR62008786-RA	AUR62036284-RA;AUR62028358-RA;AUR62028357-RA;AUR62025357-RA;AUR62010739-RA;AUR62010736-RA	AUR62032253-RA	AUR62032517-RA;AUR62017449-RA	AUR62038697-RA	AUR62032931-RA
	AUR62032373-RA;AUR62024846-RA	AUR62022089-RA	AUR62026974-RA	AUR62042456-RA;AUR62034031-RA	AUR62042092-RA;AUR62034184-RA;AUR62028511-RA;AUR62006261-RA	AUR62032931-RA
	AUR62028267-RA;AUR62025264-RA	AUR62030284-RA;AUR62018378-RA;AUR62017240-RA;AUR62010597-RA;AUR62006568-RA;AUR62000222-RA	AUR62040272-RA	AUR62028544-RA	AUR62036284-RA;AUR62028358-RA;AUR62028357-RA;AUR62025357-RA;AUR62010739-RA;AUR62010736-RA	AUR62032931-RA
	AUR62032620-RA	AUR62037104-RA	AUR62039535-RA;AUR62014170-RA	AUR62036899-RA;AUR62026355-RA;AUR62013819-RA;AUR62006309-RA	AUR62040536-RA	AUR62037642-RA
	AUR62020459-RA;AUR62015756-RA	AUR62023299-RA;AUR62009003-RA	AUR62014015-RA	AUR62005783-RA	AUR62041749-RA;AUR62041343-RA	AUR62037642-RA
	AUR62014323-RA	AUR62023966-RA	AUR62020995-RA;AUR62018438-RA	AUR62030474-RA	AUR62016509-RA	AUR62037642-RA
	AUR62011945-RA	AUR62035092-RA;AUR62025452-RA;AUR62016174-RA;AUR62008786-RA	AUR62009904-RA;AUR62001464-RA	AUR62027419-RA	AUR62013681-RA	AUR62037642-RA
	AUR62035560-RA	AUR62035879-RA;AUR62035370-RA	AUR62024589-RA;AUR62024586-RA;AUR62024583-RA	AUR62036284-RA;AUR62028358-RA;AUR62028357-RA;AUR62025357-RA;AUR62010739-RA;AUR62010736-RA	AUR62013896-RA	AUR62037642-RA
	AUR62016220-RA	AUR62040617-RA;AUR62040144-RA	AUR62040296-RA;AUR62039990-RA	AUR62002880-RA	AUR62038860-RA	AUR62037642-RA
	AUR62032889-RA;AUR62017761-RA	AUR62006587-RA;AUR62000240-RA	AUR62006817-RA	AUR62008727-RA	AUR62038040-RA	AUR62037642-RA
	AUR62017693-RA;AUR62015229-RA	AUR62027094-RA	AUR62032333-RA;AUR62028608-RA;AUR62023978-RA	AUR62023308-RA;AUR62008993-RA	AUR62035925-RA	AUR62037642-RA
	AUR62024355-RA	AUR62011512-RA	AUR62041371-RA	AUR62009619-RA;AUR62001831-RA	AUR62030628-RA;AUR62024916-RA	AUR62037642-RA
	AUR62041904-RA;AUR62033900-RA	AUR62029423-RA;AUR62003418-RA	AUR62016761-RA;AUR62011297-RA	AUR62001280-RA	AUR62023568-RA	AUR62037642-RA
	AUR62035782-RA;AUR62035779-RA;AUR62035776-RA;AUR62027580-RA;AUR62027577-RA	AUR62031047-RA;AUR62008284-RA	AUR62027103-RA	AUR62036016-RA;AUR62027896-RA	AUR62009693-RA	AUR62037642-RA
	AUR62042607-RA	AUR62002900-RA	AUR62008524-RA	AUR62037153-RA	AUR62028618-RA	AUR62037642-RA
	AUR62000839-RA	AUR62012737-RA	AUR62042443-RA;AUR62009263-RA	AUR62030413-RA;AUR62010480-RA	AUR62021390-RA;AUR62010877-RA	AUR62037642-RA
	AUR62039740-RA	AUR62040296-RA;AUR62039990-RA	AUR62021730-RA	AUR62015501-RA;AUR62002200-RA	AUR62040947-RA;AUR62038379-RA	AUR62037642-RA
	AUR62013896-RA	AUR62016797-RA;AUR62010424-RA	AUR62013896-RA	AUR62026974-RA	AUR62035093-RA;AUR62016175-RA	AUR62037642-RA
	AUR62038728-RA	AUR62024144-RA	AUR62023167-RA;AUR62009489-RA	AUR62013896-RA	AUR62029572-RA	AUR62037642-RA
	AUR62039637-RA	AUR62013630-RA;AUR62004218-RA	AUR62021918-RA	AUR62015295-RA	AUR62038066-RA	AUR62037642-RA
	AUR62019748-RA;AUR62010744-RA	AUR62016729-RA;AUR62011332-RA	AUR62010425-RA	AUR62014045-RA	AUR62025909-RA	AUR62037642-RA
	AUR62040441-RA	AUR62025616-RA	AUR62038925-RA	AUR62040144-RA	AUR62039005-RA	AUR62037642-RA
	AUR62002480-RA	AUR62024589-RA;AUR62024586-RA;AUR62024583-RA	AUR62033638-RA	AUR62038194-RA	AUR62032857-RA;AUR62005865-RA	AUR62037642-RA
	AUR62039481-RA	AUR62030224-RA	AUR62040213-RA	AUR62024337-RA;AUR62012075-RA	AUR62030474-RA	AUR62037642-RA
	AUR62033463-RA	AUR62041497-RA	AUR62037502-RA	AUR62021097-RA	AUR62043538-RA	AUR62037642-RA
	AUR62023299-RA	AUR62016243-RA	AUR62037730-RA;AUR62020272-RA	AUR62022079-RA	AUR62026104-RA;AUR62024513-RA	AUR62037642-RA
	AUR62007112-RA	AUR62039535-RA;AUR62014170-RA	AUR62031501-RA	AUR62021383-RA	AUR62006034-RA	AUR62037642-RA
	AUR62023862-RA;AUR62002325-RA	AUR62037830-RA	AUR62016243-RA	AUR62019748-RA;AUR62010744-RA	AUR62024355-RA	AUR62037642-RA
	AUR62016845-RA	AUR62014787-RA	AUR62024355-RA	AUR62037900-RA	AUR62023862-RA;AUR62002325-RA	AUR62037642-RA
	AUR62012986-RA;AUR62009998-RA	AUR62000827-RA	AUR62033993-RA;AUR62027484-RA	AUR62026104-RA	AUR62002379-RA	AUR62037642-RA
	AUR62035923-RA;AUR62035325-RA	AUR62001701-RA	AUR62030776-RA;AUR62030516-RA	AUR62007961-RA	AUR62025955-RA;AUR62024353-RA	AUR62037642-RA
	AUR62029746-RA;AUR62006403-RA	AUR62005272-RA	AUR62038728-RA;AUR62020647-RA	AUR62013288-RA	AUR62006009-RA	AUR62009776-RA
	AUR62016243-RA	AUR62036016-RA;AUR62027896-RA	AUR62001595-RA	AUR62001293-RA	AUR62004774-RA	AUR62009776-RA
	AUR62013681-RA;AUR62004181-RA	AUR62006384-RA	AUR62015029-RA	AUR62020185-RA	AUR62019540-RA	AUR62009776-RA
	AUR62000835-RA	AUR62018092-RA	AUR62036135-RA	AUR62027748-RA	AUR62010098-RA	AUR62009776-RA
	AUR62003790-RA	AUR62024135-RA;AUR62005593-RA	AUR62039015-RA;AUR62038936-RA	AUR62026108-RA;AUR62024517-RA	AUR62013381-RA	AUR62009776-RA
	AUR62020185-RA;AUR62001595-RA	AUR62016220-RA	AUR62017693-RA	AUR62016335-RA	AUR62032691-RA;AUR62032053-RA	AUR62009776-RA
	AUR62036097-RA	AUR62006284-RA	AUR62042607-RA	AUR62002570-RA	AUR62040700-RA	AUR62009776-RA
	AUR62037737-RA	AUR62040757-RA;AUR62040756-RA;AUR62033034-RA	AUR62020909-RA	AUR62018235-RA	AUR62032532-RA	AUR62009776-RA
	AUR62032526-RA	AUR62042882-RA;AUR62041213-RA	AUR62005026-RA;AUR62000941-RA	AUR62015004-RA	AUR62030234-RA	AUR62009776-RA
	AUR62041407-RA	AUR62023381-RA;AUR62013775-RA	AUR62006384-RA	AUR62010098-RA	AUR62024337-RA;AUR62012075-RA	AUR62009776-RA
	AUR62032517-RA;AUR62017449-RA	AUR62041951-RA	AUR62033398-RA	AUR62026666-RA	AUR62017225-RA	AUR62009776-RA
	AUR62036394-RA;AUR62024005-RA	AUR62032532-RA	AUR62006034-RA	AUR62041904-RA;AUR62033900-RA	AUR62010732-RA	AUR62009776-RA
	AUR62010266-RA	AUR62005026-RA	AUR62028948-RA	AUR62043319-RA;AUR62035185-RA	AUR62036292-RA	AUR62009776-RA
	AUR62006113-RA	AUR62042607-RA	AUR62003790-RA	AUR62031949-RA	AUR62034235-RA;AUR62029354-RA	AUR62009776-RA
	AUR62030151-RA;AUR62030147-RA;AUR62002691-RA;AUR62002690-RA	AUR62030292-RA	AUR62029720-RA	AUR62030000-RA;AUR62014057-RA;AUR62006781-RA;AUR62005395-RA;AUR62002578-RA;AUR62000436-RA	AUR62028718-RA;AUR62008136-RA	AUR62009776-RA
	AUR62027860-RA;AUR62019023-RA	AUR62020575-RA;AUR62009096-RA	AUR62016797-RA;AUR62010424-RA	AUR62020221-RA;AUR62001562-RA	AUR62025704-RA;AUR62001321-RA	AUR62009776-RA
	AUR62020875-RA;AUR62018543-RA	AUR62033373-RA;AUR62004284-RA	AUR62016351-RA	AUR62013237-RA	AUR62022975-RA;AUR62012333-RA	AUR62009776-RA
	AUR62013607-RA;AUR62004241-RA	AUR62037040-RA;AUR62006270-RA	AUR62024135-RA;AUR62005593-RA	AUR62011529-RA	AUR62020167-RA;AUR62001613-RA	AUR62009776-RA
	AUR62009783-RA	AUR62024285-RA	AUR62027741-RA;AUR62018907-RA	AUR62000673-RA	AUR62018784-RA;AUR62007217-RA	AUR62009776-RA
	AUR62002483-RA	AUR62008991-RA	AUR62029574-RA	AUR62044194-RA;AUR62030379-RA;AUR62026161-RA;AUR62026158-RA;AUR62026156-RA	AUR62003958-RA	AUR62009776-RA
	AUR62037750-RA;AUR62034724-RA;AUR62033663-RA;AUR62018258-RA	AUR62019117-RA;AUR62019116-RA;AUR62014375-RA;AUR62014374-RA	AUR62038409-RA;AUR62036297-RA	AUR62029281-RA	AUR62033661-RA	AUR62009776-RA
	AUR62036292-RA	AUR62015029-RA	AUR62041404-RA;AUR62016131-RA	AUR62023081-RA	AUR62016243-RA	AUR62009776-RA
	AUR62032333-RA;AUR62028608-RA;AUR62023978-RA	AUR62038254-RA	AUR62041482-RA;AUR62040542-RA	AUR62021161-RA	AUR62036557-RA	AUR62009776-RA
	AUR62026484-RA;AUR62026290-RA	AUR62017093-RA	AUR62042456-RA;AUR62034031-RA	AUR62016220-RA	AUR62003232-RA	AUR62032926-RA
	AUR62021210-RA;AUR62016002-RA;AUR62010637-RA	AUR62032397-RA;AUR62029123-RA	AUR62030921-RA;AUR62027082-RA	AUR62043393-RA;AUR62041708-RA;AUR62009294-RA	AUR62039595-RA	AUR62032926-RA
	AUR62018495-RA	AUR62042432-RA	AUR62024285-RA	AUR62040296-RA;AUR62039990-RA	AUR62022235-RA	AUR62032926-RA
	AUR62016773-RA;AUR62013343-RA;AUR62011285-RA;AUR62011144-RA	AUR62006523-RA	AUR62008994-RA;AUR62008991-RA	AUR62036292-RA	AUR62031396-RA;AUR62021142-RA	AUR62032926-RA
	AUR62013614-RA;AUR62004234-RA	AUR62003790-RA	AUR62040144-RA	AUR62035557-RA;AUR62006069-RA	AUR62040437-RA;AUR62024048-RA	AUR62032926-RA
	AUR62005360-RA	AUR62005134-RA	AUR62030784-RA;AUR62030510-RA	AUR62032333-RA;AUR62028608-RA;AUR62023978-RA	AUR62018708-RA	AUR62032926-RA
	AUR62030776-RA;AUR62030516-RA	AUR62031275-RA	AUR62015536-RA	AUR62028837-RA	AUR62032060-RA	AUR62032926-RA
	AUR62028775-RA;AUR62021685-RA;AUR62008411-RA;AUR62005786-RA	AUR62037657-RA	AUR62039178-RA	AUR62020441-RA;AUR62015777-RA	AUR62013247-RA	AUR62032926-RA
	AUR62017860-RA	AUR62036135-RA	AUR62024144-RA;AUR62005586-RA	AUR62020167-RA;AUR62001613-RA	AUR62013468-RA	AUR62032926-RA
	AUR62009619-RA;AUR62001831-RA	AUR62011475-RA	AUR62021401-RA	AUR62013614-RA;AUR62004234-RA	AUR62043085-RA;AUR62037967-RA	AUR62032926-RA
	AUR62016726-RA;AUR62011335-RA	AUR62016335-RA	AUR62042127-RA;AUR62040976-RA;AUR62009620-RA	AUR62010320-RA	AUR62043665-RA;AUR62013027-RA	AUR62032926-RA
	AUR62016705-RA;AUR62011357-RA	AUR62040700-RA	AUR62029991-RA	AUR62005135-RA;AUR62000838-RA	AUR62039015-RA;AUR62038936-RA	AUR62032926-RA
	AUR62031501-RA;AUR62012405-RA	AUR62036766-RA;AUR62013840-RA	AUR62029647-RA	AUR62021447-RA	AUR62001780-RA	AUR62032926-RA
	AUR62025560-RA	AUR62033343-RA;AUR62033316-RA	AUR62030224-RA;AUR62027526-RA	AUR62034441-RA	AUR62013959-RA	AUR62032926-RA
	AUR62029991-RA	AUR62031536-RA;AUR62012414-RA	AUR62026666-RA	AUR62044268-RA;AUR62008683-RA	AUR62032238-RA	AUR62032926-RA
	AUR62029423-RA;AUR62003418-RA	AUR62030784-RA	AUR62038540-RA;AUR62013389-RA	AUR62032567-RA;AUR62031684-RA	AUR62019453-RA	AUR62032926-RA
	AUR62042127-RA;AUR62040976-RA;AUR62009620-RA	AUR62027912-RA;AUR62027911-RA;AUR62024985-RA;AUR62024984-RA;AUR62020794-RA;AUR62014231-RA;AUR62004917-RA	AUR62004181-RA	AUR62036004-RA	AUR62031128-RA;AUR62014921-RA	AUR62032926-RA
	AUR62026800-RA;AUR62026799-RA;AUR62013474-RA;AUR62013473-RA;AUR62013472-RA	AUR62026350-RA	AUR62042882-RA	AUR62021910-RA;AUR62012748-RA	AUR62010864-RA	AUR62032926-RA
	AUR62042746-RA;AUR62018572-RA;AUR62017559-RA;AUR62015098-RA;AUR62004257-RA	AUR62025512-RA;AUR62025510-RA;AUR62025509-RA	AUR62041817-RA;AUR62039481-RA	AUR62026623-RA	AUR62023154-RA;AUR62009476-RA	AUR62032926-RA
	AUR62027179-RA;AUR62003286-RA	AUR62013681-RA;AUR62004181-RA	AUR62032517-RA	AUR62041408-RA;AUR62016134-RA;AUR62005277-RA;AUR62000676-RA	AUR62019772-RA	AUR62032926-RA
	AUR62036135-RA;AUR62019503-RA	AUR62013343-RA;AUR62011144-RA	AUR62031563-RA;AUR62012439-RA	AUR62005041-RA;AUR62000929-RA	AUR62030612-RA;AUR62024932-RA	AUR62032926-RA
	AUR62030236-RA	AUR62013121-RA;AUR62010125-RA	AUR62043903-RA;AUR62043792-RA	AUR62035782-RA;AUR62035779-RA;AUR62035776-RA;AUR62027580-RA;AUR62027577-RA	AUR62006832-RA;AUR62000488-RA	AUR62032926-RA
	AUR62023381-RA;AUR62013775-RA	AUR62043945-RA;AUR62039119-RA;AUR62009135-RA	AUR62038358-RA	AUR62001464-RA	AUR62021270-RA;AUR62016062-RA	AUR62032926-RA
	AUR62018640-RA;AUR62018639-RA;AUR62007354-RA	AUR62043903-RA;AUR62043792-RA	AUR62022089-RA	AUR62027217-RA;AUR62003253-RA	AUR62040966-RA;AUR62038363-RA;AUR62005017-RA;AUR62000951-RA	AUR62032926-RA
	AUR62003118-RA	AUR62043834-RA;AUR62029487-RA;AUR62003349-RA	AUR62020459-RA	AUR62033993-RA;AUR62027484-RA	AUR62022853-RA;AUR62012221-RA	AUR62032926-RA
	AUR62037839-RA	AUR62043230-RA;AUR62032506-RA	AUR62020350-RA;AUR62015873-RA	AUR62020547-RA;AUR62015655-RA	AUR62017578-RA	AUR62032926-RA
	AUR62039962-RA;AUR62007509-RA	AUR62041817-RA;AUR62039481-RA	AUR62000039-RA	AUR62022845-RA	AUR62044321-RA;AUR62043485-RA;AUR62025522-RA;AUR62008713-RA	AUR62032926-RA
	AUR62037882-RA	AUR62037435-RA	AUR62044194-RA;AUR62030380-RA;AUR62030379-RA;AUR62026161-RA;AUR62026158-RA;AUR62026156-RA	AUR62005192-RA;AUR62000777-RA	AUR62025914-RA	AUR62032926-RA
	AUR62034441-RA	AUR62036292-RA	AUR62038553-RA	AUR62025749-RA;AUR62001259-RA	AUR62036697-RA;AUR62013897-RA	AUR62032926-RA
	AUR62016767-RA;AUR62011292-RA	AUR62036249-RA;AUR62009697-RA	AUR62036106-RA	AUR62038860-RA	AUR62020132-RA;AUR62001644-RA	AUR62024716-RA
	AUR62012175-RA	AUR62032526-RA	AUR62027912-RA;AUR62027911-RA;AUR62024985-RA;AUR62024984-RA;AUR62020794-RA;AUR62020793-RA;AUR62014231-RA;AUR62004917-RA	AUR62036448-RA;AUR62036408-RA;AUR62017093-RA	AUR62032272-RA;AUR62016399-RA;AUR62011959-RA;AUR62011586-RA	AUR62024716-RA
	AUR62043913-RA	AUR62032525-RA	AUR62023452-RA;AUR62004501-RA	AUR62010425-RA	AUR62037830-RA	AUR62024716-RA
	AUR62030104-RA	AUR62028167-RA;AUR62005903-RA	AUR62022975-RA;AUR62012333-RA	AUR62016740-RA;AUR62011317-RA	AUR62039857-RA	AUR62024716-RA
	AUR62023689-RA;AUR62002497-RA	AUR62023389-RA;AUR62013766-RA	AUR62021210-RA;AUR62016002-RA;AUR62010637-RA	AUR62037737-RA	AUR62027865-RA	AUR62024716-RA
	AUR62021226-RA;AUR62016021-RA	AUR62021205-RA;AUR62015998-RA	AUR62020934-RA	AUR62007657-RA;AUR62007644-RA	AUR62024018-RA	AUR62024716-RA
	AUR62029720-RA	AUR62020167-RA;AUR62001613-RA	AUR62005728-RA	AUR62027857-RA;AUR62019015-RA	AUR62032505-RA	AUR62024716-RA
	AUR62008609-RA	AUR62018817-RA;AUR62007186-RA	AUR62008609-RA	AUR62015925-RA	AUR62042429-RA;AUR62018169-RA	AUR62024716-RA
	AUR62027741-RA;AUR62018907-RA	AUR62015536-RA;AUR62002173-RA	AUR62025100-RA	AUR62025866-RA	AUR62037200-RA;AUR62026849-RA	AUR62024716-RA
	AUR62013630-RA;AUR62004218-RA	AUR62013614-RA;AUR62004234-RA	AUR62026096-RA	AUR62021710-RA;AUR62008389-RA	AUR62004581-RA	AUR62024716-RA
	AUR62035539-RA;AUR62023310-RA;AUR62023307-RA	AUR62008645-RA	AUR62029198-RA;AUR62014943-RA	AUR62023381-RA;AUR62013775-RA	AUR62037130-RA;AUR62025126-RA	AUR62024716-RA
	AUR62010425-RA	AUR62017532-RA;AUR62015075-RA	AUR62021118-RA	AUR62030943-RA	AUR62001721-RA	AUR62024716-RA
	AUR62042348-RA	AUR62009735-RA	AUR62020080-RA	AUR62033478-RA	AUR62036106-RA	AUR62024716-RA
	AUR62020915-RA;AUR62018504-RA	AUR62030628-RA;AUR62029708-RA;AUR62024916-RA;AUR62006375-RA	AUR62001164-RA	AUR62013115-RA	AUR62011274-RA	AUR62024716-RA
	AUR62039001-RA	AUR62044161-RA;AUR62030684-RA	AUR62036097-RA	AUR62026803-RA	AUR62043834-RA;AUR62029487-RA;AUR62003349-RA	AUR62024716-RA
	AUR62033023-RA	AUR62019534-RA	AUR62006722-RA	AUR62043580-RA;AUR62036140-RA;AUR62036139-RA;AUR62036137-RA;AUR62026722-RA;AUR62026721-RA;AUR62019499-RA;AUR62019497-RA;AUR62019495-RA;AUR62019258-RA;AUR62013570-RA;AUR62000086-RA	AUR62033727-RA;AUR62025147-RA	AUR62024716-RA
	AUR62010443-RA	AUR62036943-RA	AUR62020100-RA;AUR62001682-RA	AUR62020074-RA;AUR62001707-RA	AUR62023380-RA;AUR62013776-RA	AUR62024716-RA
	AUR62033398-RA	AUR62022943-RA;AUR62012304-RA	AUR62012217-RA;AUR62012175-RA	AUR62027179-RA;AUR62003286-RA	AUR62027103-RA;AUR62012879-RA	AUR62024716-RA
	AUR62020103-RA	AUR62043456-RA;AUR62035048-RA;AUR62016100-RA	AUR62019322-RA	AUR62039015-RA;AUR62038936-RA	AUR62011484-RA;AUR62011480-RA	AUR62024716-RA
	AUR62003783-RA;AUR62002018-RA	AUR62034234-RA;AUR62029353-RA	AUR62036103-RA;AUR62019534-RA	AUR62037882-RA	AUR62016915-RA;AUR62014733-RA	AUR62024716-RA
	AUR62007408-RA	AUR62036097-RA	AUR62032532-RA	AUR62029228-RA;AUR62022776-RA	AUR62037884-RA	AUR62024716-RA
	AUR62040757-RA;AUR62040756-RA;AUR62033034-RA	AUR62039979-RA	AUR62018817-RA;AUR62007186-RA	AUR62020879-RA;AUR62018538-RA	AUR62036161-RA;AUR62019472-RA	AUR62024716-RA
	AUR62009520-RA;AUR62009519-RA	AUR62010951-RA	AUR62014053-RA	AUR62043834-RA;AUR62029487-RA;AUR62003349-RA	AUR62006649-RA;AUR62000304-RA	AUR62024716-RA
	AUR62022650-RA	AUR62028267-RA;AUR62025264-RA	AUR62025560-RA	AUR62035062-RA	AUR62039524-RA	AUR62024716-RA
	AUR62016604-RA;AUR62011453-RA	AUR62042762-RA;AUR62042468-RA	AUR62013115-RA	AUR62025637-RA;AUR62001364-RA	AUR62035132-RA	AUR62024716-RA
	AUR62010702-RA	AUR62036106-RA	AUR62035889-RA;AUR62035357-RA;AUR62012943-RA	AUR62005272-RA	AUR62044173-RA;AUR62041693-RA	AUR62035682-RA
	AUR62035062-RA	AUR62019322-RA	AUR62011002-RA	AUR62036500-RA;AUR62009679-RA;AUR62006520-RA;AUR62001883-RA	AUR62016767-RA;AUR62011292-RA	AUR62035682-RA
	AUR62036085-RA	AUR62034441-RA	AUR62028775-RA;AUR62021685-RA;AUR62008411-RA;AUR62005786-RA	AUR62003471-RA	AUR62038984-RA	AUR62035682-RA
	AUR62028824-RA	AUR62040947-RA;AUR62038379-RA	AUR62005210-RA;AUR62000758-RA	AUR62042726-RA;AUR62035464-RA	AUR62009679-RA;AUR62006520-RA;AUR62001883-RA	AUR62035682-RA
	AUR62031396-RA;AUR62021142-RA	AUR62037882-RA	AUR62040809-RA;AUR62036848-RA	AUR62030628-RA;AUR62029708-RA;AUR62024916-RA;AUR62006375-RA	AUR62036135-RA;AUR62019503-RA	AUR62035682-RA
	AUR62042443-RA;AUR62009263-RA	AUR62016761-RA;AUR62011297-RA	AUR62016729-RA;AUR62011332-RA	AUR62034669-RA	AUR62028990-RA	AUR62035682-RA
	AUR62016175-RA	AUR62032862-RA	AUR62019606-RA	AUR62032784-RA	AUR62040796-RA;AUR62036860-RA	AUR62035682-RA
	AUR62030413-RA;AUR62010480-RA	AUR62013052-RA;AUR62010060-RA	AUR62033023-RA	AUR62032532-RA	AUR62000839-RA	AUR62035682-RA
	AUR62039990-RA	AUR62009382-RA	AUR62010098-RA	AUR62028618-RA	AUR62021251-RA;AUR62016045-RA	AUR62035682-RA
	AUR62031766-RA	AUR62038066-RA	AUR62020083-RA	AUR62033661-RA	AUR62017375-RA;AUR62010522-RA	AUR62035682-RA
	AUR62022090-RA;AUR62001230-RA	AUR62033399-RA	AUR62003780-RA;AUR62002021-RA	AUR62025951-RA	AUR62006630-RA;AUR62002354-RA;AUR62000282-RA	AUR62035682-RA
	AUR62020441-RA;AUR62015777-RA	AUR62030790-RA	AUR62027865-RA	AUR62007107-RA	AUR62040244-RA;AUR62004002-RA	AUR62035682-RA
	AUR62000488-RA	AUR62023857-RA;AUR62002331-RA	AUR62030628-RA;AUR62029708-RA;AUR62024916-RA;AUR62006375-RA	AUR62024589-RA;AUR62024586-RA;AUR62024583-RA	AUR62023081-RA	AUR62035682-RA
	AUR62010793-RA	AUR62016439-RA;AUR62011624-RA	AUR62035062-RA	AUR62029452-RA	AUR62020864-RA;AUR62018555-RA	AUR62035682-RA
	AUR62033993-RA;AUR62027484-RA	AUR62019845-RA;AUR62010846-RA	AUR62017612-RA;AUR62015160-RA	AUR62021210-RA;AUR62016002-RA;AUR62010637-RA	AUR62033136-RA;AUR62008637-RA	AUR62035682-RA
	AUR62039719-RA;AUR62036269-RA	AUR62016767-RA;AUR62011292-RA	AUR62018092-RA	AUR62000243-RA	AUR62016195-RA	AUR62035682-RA
	AUR62021869-RA;AUR62012785-RA	AUR62021926-RA;AUR62012728-RA	AUR62006630-RA;AUR62002354-RA;AUR62000282-RA	AUR62022853-RA	AUR62023737-RA	AUR62035682-RA
	AUR62033303-RA	AUR62042328-RA	AUR62030236-RA	AUR62027912-RA;AUR62027911-RA;AUR62024985-RA;AUR62024984-RA;AUR62020794-RA;AUR62020793-RA;AUR62014231-RA;AUR62004917-RA	AUR62039311-RA	AUR62035682-RA
	AUR62022089-RA	AUR62034823-RA;AUR62029614-RA	AUR62040749-RA	AUR62039311-RA	AUR62042566-RA;AUR62018154-RA	AUR62035682-RA
	AUR62011027-RA	AUR62022975-RA;AUR62012333-RA	AUR62002409-RA	AUR62006832-RA;AUR62000488-RA	AUR62025445-RA;AUR62008790-RA	AUR62035682-RA
	AUR62035357-RA	AUR62040969-RA	AUR62038796-RA;AUR62037435-RA	AUR62023749-RA;AUR62002438-RA	AUR62035889-RA;AUR62035357-RA;AUR62012943-RA	AUR62035682-RA
	AUR62031449-RA;AUR62021082-RA	AUR62018235-RA	AUR62039001-RA	AUR62014945-RA	AUR62005072-RA;AUR62000903-RA	AUR62035682-RA
	AUR62016335-RA	AUR62044268-RA;AUR62008683-RA	AUR62022090-RA;AUR62001230-RA	AUR62037481-RA;AUR62004771-RA	AUR62032567-RA;AUR62031684-RA	AUR62037208-RA
	AUR62027800-RA	AUR62001721-RA	AUR62038860-RA	AUR62002900-RA	AUR62000010-RA	AUR62037208-RA
	AUR62031027-RA;AUR62008267-RA	AUR62024360-RA	AUR62043797-RA;AUR62040327-RA	AUR62025704-RA;AUR62001321-RA	AUR62037729-RA;AUR62020276-RA	AUR62037208-RA
	AUR62029669-RA;AUR62009316-RA	AUR62006817-RA	AUR62016287-RA;AUR62011475-RA	AUR62020875-RA	AUR62017264-RA;AUR62010620-RA	AUR62037208-RA
	AUR62016949-RA;AUR62016755-RA	AUR62002480-RA	AUR62021165-RA;AUR62015959-RA	AUR62033769-RA;AUR62029935-RA	AUR62042038-RA;AUR62033079-RA	AUR62037208-RA
	AUR62008052-RA	AUR62033661-RA	AUR62023749-RA;AUR62002438-RA	AUR62020935-RA;AUR62018485-RA	AUR62021100-RA	AUR62037208-RA
	AUR62036556-RA	AUR62016509-RA	AUR62033884-RA	AUR62016918-RA	AUR62040302-RA;AUR62039996-RA	AUR62037208-RA
	AUR62039015-RA;AUR62038936-RA	AUR62038855-RA;AUR62029587-RA	AUR62019059-RA	AUR62026452-RA	AUR62029150-RA;AUR62014977-RA	AUR62037208-RA
	AUR62029128-RA;AUR62014993-RA	AUR62006617-RA	AUR62020213-RA	AUR62026550-RA	AUR62031253-RA;AUR62027447-RA	AUR62037208-RA
	AUR62000673-RA	AUR62043580-RA;AUR62036140-RA;AUR62036139-RA;AUR62036137-RA;AUR62026722-RA;AUR62026721-RA;AUR62019499-RA;AUR62019497-RA;AUR62019495-RA;AUR62019258-RA;AUR62013570-RA;AUR62000086-RA	AUR62039625-RA	AUR62006581-RA	AUR62008052-RA	AUR62037208-RA
	AUR62032525-RA	AUR62034724-RA;AUR62033663-RA;AUR62018258-RA	AUR62036016-RA;AUR62027896-RA	AUR62021770-RA;AUR62008327-RA	AUR62043580-RA;AUR62036140-RA;AUR62036139-RA;AUR62036137-RA;AUR62026722-RA;AUR62026721-RA;AUR62019499-RA;AUR62019497-RA;AUR62019495-RA;AUR62019258-RA;AUR62013570-RA;AUR62000086-RA	AUR62037208-RA
	AUR62027103-RA;AUR62012879-RA	AUR62039595-RA	AUR62012986-RA	AUR62022089-RA	AUR62030870-RA;AUR62027027-RA	AUR62037208-RA
	AUR62001819-RA	AUR62042348-RA	AUR62007425-RA	AUR62032238-RA	AUR62033638-RA	AUR62037208-RA
	AUR62017612-RA;AUR62015160-RA	AUR62026096-RA	AUR62044490-RA;AUR62014529-RA;AUR62008976-RA	AUR62033638-RA	AUR62004437-RA	AUR62037208-RA
	AUR62044321-RA;AUR62043485-RA;AUR62025522-RA;AUR62008713-RA	AUR62037507-RA;AUR62004745-RA	AUR62035879-RA;AUR62035370-RA	AUR62028627-RA;AUR62008052-RA	AUR62015029-RA	AUR62037208-RA
	AUR62009382-RA	AUR62016351-RA;AUR62011529-RA	AUR62039311-RA	AUR62004873-RA	AUR62006381-RA	AUR62037208-RA
	AUR62030943-RA	AUR62000488-RA	AUR62011453-RA	AUR62024119-RA;AUR62005609-RA	AUR62033621-RA	AUR62037208-RA
	AUR62030628-RA;AUR62029708-RA;AUR62024916-RA;AUR62006375-RA	AUR62029647-RA	AUR62020311-RA	AUR62010702-RA	AUR62023381-RA;AUR62013775-RA	AUR62037208-RA
	AUR62038348-RA	AUR62021165-RA;AUR62015959-RA	AUR62017264-RA;AUR62010620-RA	AUR62007959-RA	AUR62032889-RA;AUR62017761-RA	AUR62037208-RA
	AUR62025616-RA	AUR62039178-RA	AUR62005272-RA	AUR62040749-RA	AUR62024589-RA;AUR62024586-RA;AUR62024583-RA;AUR62011746-RA	AUR62037208-RA
	AUR62025561-RA;AUR62008682-RA	AUR62038728-RA;AUR62020647-RA	AUR62032089-RA	AUR62018817-RA;AUR62007186-RA	AUR62027419-RA;AUR62027358-RA	AUR62034046-RA;AUR62029769-RA;AUR62002671-RA
	AUR62038796-RA;AUR62037435-RA	AUR62032889-RA;AUR62017761-RA	AUR62032240-RA;AUR62011924-RA	AUR62004774-RA	AUR62009615-RA;AUR62001828-RA	AUR62034046-RA;AUR62029769-RA;AUR62002671-RA
	AUR62034535-RA	AUR62035035-RA	AUR62040947-RA;AUR62038379-RA	AUR62028183-RA	AUR62021812-RA	AUR62034046-RA;AUR62029769-RA;AUR62002671-RA
	AUR62005211-RA;AUR62000757-RA	AUR62037502-RA	AUR62016439-RA;AUR62011624-RA	AUR62019845-RA;AUR62010846-RA	AUR62044455-RA;AUR62043613-RA	AUR62034046-RA;AUR62029769-RA;AUR62002671-RA
	AUR62034332-RA	AUR62039740-RA;AUR62011274-RA	AUR62033121-RA	AUR62018784-RA;AUR62007217-RA	AUR62011516-RA	AUR62034046-RA;AUR62029769-RA;AUR62002671-RA
	AUR62021447-RA	AUR62040749-RA	AUR62037882-RA	AUR62040213-RA	AUR62029726-RA	AUR62034046-RA;AUR62029769-RA;AUR62002671-RA
	AUR62010889-RA	AUR62016175-RA	AUR62014498-RA	AUR62029726-RA	AUR62036470-RA	AUR62034046-RA;AUR62029769-RA;AUR62002671-RA
	AUR62040841-RA;AUR62030358-RA	AUR62033303-RA	AUR62032506-RA	AUR62020132-RA	AUR62033121-RA	AUR62034046-RA;AUR62029769-RA;AUR62002671-RA
	AUR62039524-RA	AUR62031396-RA;AUR62021142-RA	AUR62027969-RA;AUR62020744-RA	AUR62011484-RA;AUR62011480-RA	AUR62031047-RA;AUR62008284-RA	AUR62034046-RA;AUR62029769-RA;AUR62002671-RA
	AUR62029726-RA	AUR62020851-RA	AUR62009382-RA	AUR62007936-RA	AUR62008420-RA	AUR62034046-RA;AUR62029769-RA;AUR62002671-RA
	AUR62034321-RA	AUR62030181-RA;AUR62022407-RA;AUR62002731-RA;AUR62002730-RA	AUR62010449-RA	AUR62013858-RA	AUR62004999-RA;AUR62000966-RA	AUR62034046-RA;AUR62029769-RA;AUR62002671-RA
	AUR62023263-RA;AUR62023216-RA	AUR62043061-RA	AUR62036292-RA	AUR62037200-RA;AUR62026849-RA	AUR62003471-RA	AUR62034046-RA;AUR62029769-RA;AUR62002671-RA
	AUR62044622-RA;AUR62044196-RA;AUR62044195-RA;AUR62040858-RA;AUR62026160-RA;AUR62026159-RA;AUR62026157-RA	AUR62018708-RA;AUR62007297-RA	AUR62018538-RA	AUR62032862-RA;AUR62005870-RA	AUR62030943-RA	AUR62034046-RA;AUR62029769-RA;AUR62002671-RA
	AUR62032572-RA;AUR62031691-RA	AUR62035262-RA;AUR62002903-RA	AUR62001819-RA	AUR62001780-RA	AUR62001878-RA	AUR62034046-RA;AUR62029769-RA;AUR62002671-RA
	AUR62039311-RA	AUR62029720-RA	AUR62034332-RA	AUR62015029-RA	AUR62036893-RA	AUR62034046-RA;AUR62029769-RA;AUR62002671-RA
	AUR62007657-RA;AUR62007644-RA	AUR62019791-RA;AUR62010794-RA	AUR62009225-RA	AUR62038880-RA	AUR62042698-RA;AUR62040191-RA	AUR62034046-RA;AUR62029769-RA;AUR62002671-RA
	AUR62027210-RA;AUR62019146-RA;AUR62014409-RA;AUR62003258-RA	AUR62014053-RA	AUR62028336-RA;AUR62025327-RA;AUR62016463-RA;AUR62011632-RA	AUR62021390-RA;AUR62010877-RA	AUR62000243-RA	AUR62034046-RA;AUR62029769-RA;AUR62002671-RA
	AUR62002900-RA	AUR62008524-RA	AUR62009427-RA	AUR62010732-RA	AUR62028349-RA	AUR62034046-RA;AUR62029769-RA;AUR62002671-RA
	AUR62041408-RA;AUR62016134-RA;AUR62005277-RA;AUR62000676-RA	AUR62041673-RA	AUR62027167-RA;AUR62003295-RA	AUR62032889-RA;AUR62017761-RA	AUR62041190-RA	AUR62034046-RA;AUR62029769-RA;AUR62002671-RA
	AUR62006009-RA	AUR62021226-RA;AUR62016021-RA	AUR62005211-RA	AUR62024355-RA	AUR62036845-RA	AUR62034046-RA;AUR62029769-RA;AUR62002671-RA
	AUR62024608-RA;AUR62011762-RA	AUR62020636-RA	AUR62022970-RA;AUR62012328-RA	AUR62040586-RA	AUR62022089-RA	AUR62034046-RA;AUR62029769-RA;AUR62002671-RA
	AUR62000010-RA	AUR62030413-RA;AUR62010480-RA	AUR62043067-RA	AUR62032253-RA;AUR62011937-RA	AUR62042607-RA	AUR62034046-RA;AUR62029769-RA;AUR62002671-RA
	AUR62038066-RA	AUR62027167-RA;AUR62003295-RA	AUR62033343-RA;AUR62033316-RA;AUR62004328-RA	AUR62013085-RA	AUR62032784-RA	AUR62006286-RA
	AUR62029198-RA;AUR62014943-RA	AUR62032572-RA;AUR62031691-RA	AUR62030790-RA	AUR62008285-RA	AUR62032264-RA	AUR62006286-RA
	AUR62033591-RA	AUR62038845-RA	AUR62014540-RA;AUR62008963-RA	AUR62036227-RA;AUR62009720-RA	AUR62006617-RA;AUR62000269-RA	AUR62006286-RA
	AUR62023153-RA	AUR62023749-RA;AUR62002438-RA	AUR62005783-RA	AUR62018708-RA;AUR62007297-RA	AUR62036261-RA	AUR62006286-RA
	AUR62028618-RA	AUR62041284-RA;AUR62034115-RA	AUR62013085-RA	AUR62024285-RA	AUR62012092-RA	AUR62006286-RA
	AUR62043839-RA	AUR62029198-RA;AUR62014943-RA	AUR62032784-RA;AUR62005795-RA	AUR62016133-RA	AUR62013085-RA	AUR62006286-RA
	AUR62040684-RA	AUR62020083-RA	AUR62025616-RA	AUR62021811-RA	AUR62037882-RA	AUR62006286-RA
	AUR62030785-RA;AUR62030508-RA	AUR62003783-RA;AUR62002018-RA	AUR62017860-RA;AUR62003546-RA	AUR62041614-RA;AUR62036010-RA	AUR62018235-RA	AUR62006286-RA
	AUR62006722-RA;AUR62000367-RA	AUR62042456-RA;AUR62034031-RA	AUR62024608-RA;AUR62011762-RA	AUR62033343-RA;AUR62033316-RA;AUR62004328-RA	AUR62012719-RA	AUR62006286-RA
	AUR62033769-RA;AUR62029935-RA	AUR62027103-RA;AUR62012879-RA	AUR62023081-RA	AUR62027277-RA;AUR62007455-RA	AUR62042432-RA	AUR62006286-RA
	AUR62020074-RA;AUR62001707-RA	AUR62019659-RA;AUR62013952-RA	AUR62000673-RA	AUR62008420-RA	AUR62024917-RA	AUR62006286-RA
	AUR62010732-RA	AUR62005211-RA	AUR62043839-RA	AUR62032437-RA;AUR62024784-RA	AUR62029688-RA	AUR62006286-RA
	AUR62006748-RA;AUR62000392-RA	AUR62040461-RA	AUR62011516-RA	AUR62028349-RA;AUR62025346-RA	AUR62021587-RA;AUR62008505-RA	AUR62006286-RA
	AUR62036261-RA	AUR62010089-RA	AUR62013614-RA;AUR62004234-RA	AUR62036261-RA	AUR62018954-RA	AUR62006286-RA
	AUR62042432-RA	AUR62022090-RA;AUR62001230-RA	AUR62035560-RA	AUR62012092-RA	AUR62014503-RA	AUR62006286-RA
	AUR62039661-RA	AUR62020252-RA	AUR62026091-RA	AUR62024917-RA	AUR62010964-RA	AUR62006286-RA
	AUR62012092-RA	AUR62034778-RA;AUR62009508-RA	AUR62021558-RA	AUR62029656-RA	AUR62027802-RA;AUR62018956-RA	AUR62006286-RA
	AUR62018034-RA	AUR62032620-RA;AUR62031735-RA	AUR62009794-RA	AUR62041490-RA	AUR62003256-RA	AUR62006286-RA
	AUR62004774-RA	AUR62034535-RA	AUR62035028-RA	AUR62029956-RA	AUR62013646-RA	AUR62006286-RA
	AUR62022853-RA	AUR62005360-RA	AUR62029560-RA	AUR62034332-RA	AUR62037914-RA	AUR62006286-RA
	AUR62018567-RA	AUR62039524-RA	AUR62031396-RA;AUR62021142-RA	AUR62012737-RA	AUR62020909-RA	AUR62006286-RA
	AUR62020601-RA	AUR62007425-RA	AUR62030000-RA;AUR62014057-RA;AUR62006781-RA;AUR62005395-RA;AUR62002578-RA;AUR62000436-RA	AUR62002325-RA	AUR62035048-RA	AUR62020767-RA
	AUR62036611-RA	AUR62025434-RA	AUR62016918-RA	AUR62036611-RA	AUR62012226-RA	AUR62020767-RA
	AUR62024917-RA	AUR62037737-RA	AUR62044161-RA;AUR62030684-RA	AUR62009102-RA	AUR62004958-RA	AUR62020767-RA
	AUR62013085-RA	AUR62026091-RA	AUR62030965-RA;AUR62008212-RA	AUR62003022-RA	AUR62006462-RA	AUR62020767-RA
	AUR62032014-RA	AUR62030000-RA;AUR62014057-RA;AUR62011749-RA;AUR62006781-RA;AUR62005395-RA;AUR62002578-RA;AUR62000436-RA	AUR62026758-RA;AUR62013514-RA	AUR62011002-RA	AUR62026666-RA	AUR62020767-RA
	AUR62001762-RA	AUR62038409-RA;AUR62036297-RA	AUR62026452-RA	AUR62032014-RA	AUR62004873-RA	AUR62020767-RA
	AUR62023167-RA;AUR62009489-RA	AUR62030011-RA;AUR62002588-RA	AUR62040966-RA;AUR62038363-RA;AUR62005017-RA;AUR62000951-RA	AUR62006034-RA	AUR62006384-RA	AUR62020767-RA
	AUR62009367-RA	AUR62034669-RA	AUR62040931-RA;AUR62004847-RA	AUR62004958-RA	AUR62040684-RA	AUR62020767-RA
	AUR62009615-RA;AUR62001828-RA	AUR62019063-RA	AUR62027277-RA	AUR62032119-RA	AUR62038797-RA	AUR62020767-RA
	AUR62012283-RA	AUR62019028-RA	AUR62013237-RA	AUR62009615-RA;AUR62001828-RA	AUR62034007-RA;AUR62027474-RA	AUR62020767-RA
	AUR62012226-RA	AUR62040569-RA	AUR62002900-RA	AUR62010510-RA	AUR62019744-RA;AUR62010741-RA	AUR62020767-RA
	AUR62005225-RA;AUR62000739-RA	AUR62041212-RA;AUR62032269-RA;AUR62011956-RA	AUR62006009-RA	AUR62012879-RA	AUR62001572-RA	AUR62020767-RA
	AUR62030489-RA	AUR62000531-RA	AUR62042432-RA	AUR62013646-RA	AUR62000739-RA	AUR62020767-RA
	AUR62022174-RA	AUR62028775-RA;AUR62021685-RA;AUR62008411-RA;AUR62005786-RA	AUR62039661-RA	AUR62000739-RA	AUR62023907-RA	AUR62020767-RA
	AUR62040569-RA	AUR62033148-RA;AUR62008623-RA	AUR62018034-RA	AUR62031785-RA;AUR62011737-RA	AUR62036617-RA	AUR62020767-RA
	AUR62040571-RA	AUR62008167-RA	AUR62029956-RA	AUR62019744-RA;AUR62010741-RA	AUR62010266-RA	AUR62020767-RA
	AUR62032524-RA	AUR62037667-RA	AUR62002137-RA	AUR62001701-RA	AUR62002451-RA	AUR62020767-RA
	AUR62011681-RA	AUR62002409-RA	AUR62019063-RA	AUR62006384-RA	AUR62009475-RA	AUR62020767-RA
	AUR62036916-RA	AUR62020934-RA	AUR62026853-RA	AUR62025100-RA	AUR62024598-RA	AUR62020767-RA
	AUR62015029-RA	AUR62041458-RA	AUR62020851-RA	AUR62001572-RA	AUR62044404-RA	AUR62020767-RA
	AUR62006589-RA;AUR62000243-RA	AUR62018543-RA	AUR62036611-RA	AUR62032855-RA;AUR62032854-RA;AUR62005863-RA;AUR62005862-RA	AUR62030236-RA	AUR62020767-RA
	AUR62013381-RA	AUR62020132-RA;AUR62001644-RA	AUR62012092-RA	AUR62029475-RA;AUR62003361-RA	AUR62021447-RA	AUR62020767-RA
	AUR62016351-RA;AUR62011529-RA	AUR62010031-RA	AUR62024917-RA	AUR62021717-RA;AUR62008381-RA	AUR62021027-RA;AUR62018416-RA	AUR62020767-RA
	AUR62007455-RA	AUR62009904-RA;AUR62001464-RA	AUR62029818-RA	AUR62036916-RA	AUR62017151-RA	AUR62020767-RA
	AUR62002070-RA	AUR62026800-RA;AUR62026799-RA;AUR62013474-RA;AUR62013473-RA;AUR62013472-RA	AUR62018235-RA	AUR62011681-RA	AUR62015260-RA	AUR62020767-RA
	AUR62036249-RA;AUR62009697-RA	AUR62005225-RA	AUR62004774-RA	AUR62033303-RA	AUR62006403-RA	AUR62020767-RA
	AUR62034119-RA	AUR62016593-RA;AUR62011462-RA	AUR62013758-RA;AUR62013755-RA	AUR62014455-RA	AUR62042726-RA	AUR62020767-RA
	AUR62029665-RA	AUR62028367-RA;AUR62025383-RA	AUR62026788-RA	AUR62021897-RA	AUR62039785-RA;AUR62034431-RA	AUR62020767-RA
	AUR62024598-RA;AUR62011754-RA	AUR62023979-RA	AUR62031316-RA	AUR62014930-RA	AUR62037212-RA	AUR62029991-RA
	AUR62020995-RA;AUR62018438-RA	AUR62024709-RA;AUR62011866-RA	AUR62010793-RA	AUR62024598-RA;AUR62011754-RA	AUR62032572-RA	AUR62029991-RA
	AUR62019606-RA	AUR62034119-RA	AUR62001431-RA	AUR62039924-RA;AUR62007466-RA	AUR62032547-RA;AUR62031661-RA	AUR62029991-RA
	AUR62018901-RA	AUR62024329-RA;AUR62012068-RA	AUR62010374-RA	AUR62014840-RA	AUR62032415-RA	AUR62029991-RA
	AUR62018416-RA	AUR62017013-RA;AUR62014817-RA	AUR62010702-RA	AUR62044161-RA;AUR62030684-RA	AUR62029339-RA	AUR62029991-RA
	AUR62018061-RA;AUR62015260-RA	AUR62005210-RA;AUR62000758-RA	AUR62016175-RA	AUR62041286-RA	AUR62028198-RA;AUR62002081-RA	AUR62029991-RA
	AUR62012296-RA	AUR62004774-RA	AUR62000966-RA	AUR62037729-RA;AUR62020276-RA	AUR62023332-RA	AUR62029991-RA
	AUR62005210-RA	AUR62020074-RA;AUR62001707-RA	AUR62037737-RA	AUR62029560-RA;AUR62005532-RA	AUR62023105-RA	AUR62029991-RA
	AUR62002272-RA	AUR62028824-RA;AUR62005737-RA	AUR62033303-RA	AUR62020311-RA	AUR62020879-RA	AUR62029991-RA
	AUR62042092-RA;AUR62034184-RA;AUR62028511-RA;AUR62006261-RA	AUR62042092-RA	AUR62030474-RA	AUR62018079-RA	AUR62020215-RA	AUR62029991-RA
	AUR62040949-RA;AUR62038378-RA	AUR62039311-RA	AUR62004958-RA	AUR62016395-RA;AUR62011579-RA	AUR62013237-RA	AUR62029991-RA
	AUR62038013-RA	AUR62021400-RA;AUR62010888-RA	AUR62019744-RA;AUR62010741-RA	AUR62015995-RA	AUR62005245-RA;AUR62000719-RA	AUR62029991-RA
	AUR62037745-RA	AUR62010889-RA	AUR62037606-RA;AUR62004873-RA	AUR62013372-RA	AUR62040949-RA;AUR62038378-RA	AUR62029991-RA
	AUR62036457-RA;AUR62017103-RA	AUR62036969-RA	AUR62038845-RA	AUR62011602-RA	AUR62037750-RA;AUR62034724-RA;AUR62033663-RA;AUR62033662-RA;AUR62018258-RA	AUR62029991-RA
	AUR62036328-RA	AUR62015925-RA	AUR62032524-RA	AUR62007559-RA;AUR62005148-RA;AUR62004044-RA;AUR62000825-RA	AUR62037589-RA	AUR62029991-RA
	AUR62033748-RA;AUR62029939-RA	AUR62006722-RA	AUR62031592-RA	AUR62043085-RA;AUR62037967-RA	AUR62033343-RA;AUR62033316-RA;AUR62004328-RA	AUR62029991-RA
	AUR62032532-RA	AUR62020103-RA	AUR62042474-RA;AUR62038889-RA	AUR62042882-RA;AUR62041213-RA	AUR62032418-RA;AUR62024802-RA	AUR62029991-RA
	AUR62031536-RA;AUR62012414-RA	AUR62039661-RA	AUR62016773-RA;AUR62013343-RA;AUR62011285-RA;AUR62011144-RA	AUR62040219-RA;AUR62009220-RA	AUR62030760-RA;AUR62030535-RA	AUR62029991-RA
	AUR62028367-RA;AUR62025383-RA	AUR62020601-RA	AUR62011681-RA	AUR62039587-RA	AUR62030709-RA	AUR62029991-RA
	AUR62025298-RA	AUR62000822-RA	AUR62036916-RA	AUR62038764-RA;AUR62020618-RA;AUR62009044-RA	AUR62030155-RA;AUR62002697-RA	AUR62029991-RA
	AUR62021468-RA;AUR62010951-RA	AUR62042597-RA;AUR62037329-RA	AUR62014880-RA	AUR62038240-RA;AUR62003926-RA	AUR62029432-RA;AUR62003408-RA	AUR62029991-RA
	AUR62020350-RA;AUR62015873-RA;AUR62010687-RA	AUR62026407-RA;AUR62026224-RA	AUR62034119-RA	AUR62037750-RA;AUR62034724-RA;AUR62033663-RA;AUR62033662-RA;AUR62018258-RA	AUR62027888-RA;AUR62019048-RA	AUR62029991-RA
	AUR62020257-RA	AUR62012340-RA	AUR62025561-RA	AUR62037313-RA	AUR62023013-RA;AUR62009326-RA	AUR62022530-RA
	AUR62018096-RA	AUR62006403-RA	AUR62024847-RA	AUR62035889-RA;AUR62035357-RA;AUR62012943-RA	AUR62020575-RA;AUR62009096-RA	AUR62022530-RA
	AUR62017264-RA;AUR62010620-RA	AUR62034490-RA;AUR62034169-RA	AUR62000534-RA	AUR62032572-RA;AUR62031691-RA	AUR62019659-RA;AUR62013952-RA	AUR62022530-RA
	AUR62014053-RA	AUR62033769-RA;AUR62029935-RA	AUR62041078-RA	AUR62030760-RA;AUR62030535-RA	AUR62016063-RA	AUR62022530-RA
	AUR62012170-RA	AUR62032722-RA;AUR62032029-RA	AUR62033275-RA;AUR62021363-RA	AUR62029988-RA;AUR62002566-RA	AUR62013651-RA;AUR62004194-RA	AUR62022530-RA
	AUR62011516-RA	AUR62030943-RA	AUR62016767-RA;AUR62011292-RA	AUR62028653-RA;AUR62008072-RA	AUR62013372-RA;AUR62011119-RA	AUR62022530-RA
	AUR62006581-RA	AUR62029726-RA	AUR62013607-RA	AUR62028198-RA;AUR62002081-RA	AUR62010019-RA	AUR62022530-RA
	AUR62004559-RA	AUR62012092-RA	AUR62043393-RA;AUR62041708-RA;AUR62009294-RA	AUR62027453-RA	AUR62009794-RA	AUR62022530-RA
	AUR62003352-RA	AUR62036611-RA	AUR62037745-RA	AUR62024208-RA;AUR62005529-RA	AUR62009691-RA	AUR62022530-RA
	AUR62002354-RA	AUR62042922-RA;AUR62015238-RA	AUR62032722-RA;AUR62032029-RA	AUR62023105-RA	AUR62009563-RA;AUR62001775-RA	AUR62022530-RA
	AUR62043927-RA;AUR62019158-RA;AUR62014422-RA	AUR62022369-RA	AUR62032629-RA	AUR62022090-RA;AUR62001230-RA	AUR62007826-RA;AUR62003022-RA	AUR62022530-RA
	AUR62043812-RA	AUR62022853-RA	AUR62026678-RA	AUR62020995-RA;AUR62018438-RA	AUR62007271-RA	AUR62022530-RA
	AUR62043230-RA;AUR62032506-RA	AUR62030465-RA	AUR62020222-RA	AUR62016243-RA	AUR62005413-RA	AUR62022530-RA
	AUR62042164-RA;AUR62030181-RA;AUR62022407-RA;AUR62002731-RA;AUR62002730-RA	AUR62013758-RA;AUR62013755-RA	AUR62020045-RA	AUR62016063-RA	AUR62005383-RA	AUR62022530-RA
	AUR62041604-RA;AUR62040637-RA	AUR62010793-RA	AUR62009267-RA	AUR62011683-RA	AUR62004893-RA;AUR62001059-RA	AUR62022530-RA
	AUR62039925-RA;AUR62007467-RA	AUR62010964-RA	AUR62005737-RA	AUR62009794-RA	AUR62003124-RA	AUR62022530-RA
	AUR62039184-RA;AUR62037644-RA	AUR62022399-RA	AUR62005147-RA;AUR62000827-RA	AUR62009783-RA	AUR62044192-RA;AUR62043315-RA;AUR62037643-RA;AUR62009538-RA	AUR62022530-RA
	AUR62038466-RA;AUR62034125-RA;AUR62027912-RA;AUR62027911-RA;AUR62027060-RA;AUR62026891-RA;AUR62024985-RA;AUR62024984-RA;AUR62024184-RA;AUR62021014-RA;AUR62020794-RA;AUR62020793-RA;AUR62019695-RA;AUR62015129-RA;AUR62014231-RA;AUR62013609-RA;AUR62011879-RA;AUR62011168-RA;AUR62010460-RA;AUR62004917-RA	AUR62031316-RA	AUR62001034-RA	AUR62008645-RA	AUR62043927-RA;AUR62019158-RA;AUR62014422-RA	AUR62022530-RA
	AUR62037200-RA;AUR62026849-RA	AUR62006462-RA	AUR62043456-RA;AUR62035048-RA;AUR62016100-RA	AUR62008442-RA	AUR62043319-RA;AUR62035185-RA	AUR62022530-RA
	AUR62037147-RA;AUR62025072-RA	AUR62012226-RA	AUR62042043-RA	AUR62004926-RA;AUR62001026-RA	AUR62042515-RA;AUR62027344-RA;AUR62011277-RA	AUR62022530-RA
	AUR62037040-RA;AUR62006270-RA	AUR62008052-RA	AUR62040441-RA;AUR62024050-RA	AUR62003531-RA	AUR62041876-RA;AUR62030169-RA;AUR62030121-RA;AUR62021207-RA	AUR62002012-RA
	AUR62036769-RA;AUR62013836-RA	AUR62020265-RA	AUR62036249-RA;AUR62009697-RA	AUR62003170-RA	AUR62041604-RA;AUR62040637-RA	AUR62002012-RA
	AUR62035035-RA;AUR62016088-RA	AUR62001001-RA	AUR62032889-RA;AUR62017761-RA	AUR62002354-RA	AUR62040842-RA;AUR62030359-RA	AUR62002012-RA
	AUR62032721-RA;AUR62005041-RA;AUR62000929-RA	AUR62030489-RA	AUR62032525-RA	AUR62043812-RA	AUR62040235-RA;AUR62004012-RA	AUR62002012-RA
	AUR62032437-RA;AUR62024784-RA	AUR62033591-RA	AUR62032269-RA;AUR62011956-RA	AUR62043759-RA;AUR62039931-RA;AUR62008115-RA;AUR62007473-RA	AUR62039184-RA;AUR62037644-RA	AUR62002012-RA
	AUR62032415-RA;AUR62024805-RA	AUR62019941-RA	AUR62031639-RA	AUR62043734-RA;AUR62018027-RA;AUR62003716-RA	AUR62038599-RA;AUR62034013-RA	AUR62002012-RA
	AUR62031433-RA;AUR62021108-RA	AUR62009612-RA;AUR62001825-RA	AUR62030943-RA	AUR62042842-RA;AUR62021766-RA;AUR62008333-RA	AUR62038151-RA;AUR62009839-RA	AUR62002012-RA
	AUR62031292-RA;AUR62027376-RA	AUR62042127-RA;AUR62040976-RA;AUR62009620-RA	AUR62030785-RA;AUR62030508-RA	AUR62042474-RA;AUR62038889-RA;AUR62019279-RA;AUR62000102-RA	AUR62037313-RA;AUR62032320-RA;AUR62032319-RA;AUR62028593-RA;AUR62028592-RA	AUR62002012-RA
	AUR62030784-RA;AUR62030510-RA	AUR62009615-RA;AUR62001828-RA	AUR62030292-RA	AUR62042092-RA;AUR62034184-RA;AUR62028511-RA;AUR62006261-RA	AUR62034822-RA;AUR62029560-RA;AUR62029558-RA;AUR62005532-RA	AUR62002012-RA
	AUR62029988-RA;AUR62002566-RA	AUR62010098-RA	AUR62027748-RA	AUR62041604-RA;AUR62040637-RA	AUR62032721-RA;AUR62005041-RA;AUR62000929-RA	AUR62002012-RA
	AUR62027969-RA;AUR62020744-RA	AUR62020081-RA;AUR62020080-RA	AUR62027453-RA	AUR62040949-RA;AUR62038378-RA	AUR62032620-RA;AUR62031735-RA	AUR62002012-RA
	AUR62026350-RA;AUR62026349-RA;AUR62006306-RA;AUR62006305-RA;AUR62002022-RA	AUR62036470-RA	AUR62026484-RA	AUR62040931-RA	AUR62032119-RA	AUR62002012-RA
	AUR62024329-RA;AUR62012068-RA	AUR62032524-RA	AUR62026349-RA	AUR62040302-RA;AUR62039996-RA;AUR62031812-RA;AUR62008896-RA	AUR62031998-RA;AUR62018096-RA	AUR62002012-RA
	AUR62024285-RA	AUR62013247-RA	AUR62026108-RA;AUR62024517-RA	AUR62039184-RA;AUR62037644-RA	AUR62031316-RA	AUR62002012-RA
	AUR62024208-RA;AUR62005529-RA	AUR62011681-RA	AUR62021468-RA;AUR62010951-RA	AUR62038151-RA;AUR62009839-RA	AUR62029719-RA;AUR62029718-RA	AUR62002012-RA
	AUR62024161-RA;AUR62005569-RA	AUR62036916-RA	AUR62020547-RA;AUR62015655-RA	AUR62037040-RA;AUR62006270-RA	AUR62029483-RA;AUR62003353-RA	AUR62002012-RA
	AUR62024135-RA;AUR62005593-RA	AUR62021447-RA	AUR62019642-RA	AUR62034376-RA;AUR62022318-RA	AUR62029281-RA	AUR62002012-RA
	AUR62024108-RA	AUR62005521-RA	AUR62018839-RA;AUR62007167-RA	AUR62033748-RA;AUR62029939-RA	AUR62027657-RA	AUR62002012-RA
	AUR62023869-RA	AUR62044321-RA;AUR62043485-RA;AUR62025522-RA;AUR62008713-RA	AUR62018078-RA	AUR62032970-RA;AUR62017711-RA	AUR62027320-RA;AUR62007412-RA	AUR62009110-RA
	AUR62021558-RA;AUR62008532-RA	AUR62037200-RA;AUR62026849-RA	AUR62018045-RA;AUR62015247-RA	AUR62030862-RA;AUR62027021-RA	AUR62024246-RA	AUR62009110-RA
	AUR62021205-RA;AUR62015998-RA	AUR62036394-RA;AUR62024005-RA	AUR62017013-RA;AUR62014817-RA	AUR62029809-RA;AUR62023087-RA;AUR62009404-RA	AUR62024119-RA;AUR62005609-RA	AUR62009110-RA
	AUR62020934-RA	AUR62031088-RA;AUR62014880-RA	AUR62016740-RA;AUR62011317-RA	AUR62029719-RA;AUR62029718-RA	AUR62022675-RA	AUR62009110-RA
	AUR62019916-RA;AUR62007052-RA	AUR62027253-RA;AUR62010715-RA	AUR62016335-RA	AUR62029483-RA;AUR62003353-RA	AUR62020987-RA	AUR62009110-RA
	AUR62019907-RA;AUR62007043-RA	AUR62025995-RA	AUR62015925-RA	AUR62028321-RA;AUR62025338-RA	AUR62020934-RA	AUR62009110-RA
	AUR62019874-RA;AUR62007010-RA	AUR62018416-RA	AUR62013976-RA;AUR62005328-RA	AUR62028282-RA;AUR62025278-RA	AUR62019606-RA	AUR62009110-RA
	AUR62019245-RA;AUR62000071-RA	AUR62011754-RA	AUR62006927-RA	AUR62024308-RA	AUR62019037-RA	AUR62009110-RA
	AUR62018817-RA;AUR62007186-RA	AUR62000820-RA	AUR62006581-RA	AUR62024135-RA;AUR62005593-RA	AUR62018079-RA	AUR62009110-RA
	AUR62018708-RA;AUR62007297-RA	AUR62040779-RA	AUR62001023-RA	AUR62022675-RA	AUR62017312-RA;AUR62010578-RA	AUR62009110-RA
	AUR62017594-RA	AUR62038709-RA;AUR62034091-RA	AUR62044519-RA;AUR62009693-RA;AUR62001896-RA	AUR62021558-RA;AUR62008532-RA	AUR62016668-RA;AUR62011393-RA	AUR62009110-RA
	AUR62016737-RA;AUR62011323-RA	AUR62037729-RA	AUR62042092-RA;AUR62034184-RA;AUR62028511-RA;AUR62006261-RA	AUR62020987-RA	AUR62013115-RA;AUR62010120-RA	AUR62009110-RA
	AUR62015531-RA;AUR62002178-RA	AUR62024608-RA;AUR62011762-RA	AUR62041604-RA;AUR62040637-RA	AUR62020934-RA	AUR62012216-RA	AUR62009110-RA
	AUR62014075-RA;AUR62005413-RA	AUR62023651-RA;AUR62002541-RA	AUR62041409-RA;AUR62041408-RA;AUR62024665-RA;AUR62016134-RA;AUR62011821-RA;AUR62005277-RA;AUR62000676-RA	AUR62019916-RA;AUR62007052-RA	AUR62011683-RA	AUR62009110-RA
	AUR62013976-RA;AUR62005328-RA	AUR62011516-RA	AUR62040302-RA;AUR62039996-RA;AUR62031812-RA;AUR62008896-RA	AUR62018728-RA;AUR62007271-RA	AUR62007988-RA;AUR62003170-RA	AUR62009110-RA
	AUR62007988-RA;AUR62003170-RA	AUR62010158-RA	AUR62040219-RA;AUR62009220-RA	AUR62016773-RA;AUR62013343-RA;AUR62011285-RA;AUR62011144-RA	AUR62006748-RA;AUR62000392-RA	AUR62009110-RA
	AUR62003780-RA;AUR62002021-RA	AUR62010019-RA	AUR62038151-RA;AUR62009839-RA	AUR62015531-RA;AUR62002178-RA	AUR62001894-RA	AUR62009110-RA
	AUR62022975-RA;AUR62012333-RA	AUR62007354-RA	AUR62037507-RA;AUR62004745-RA	AUR62014075-RA;AUR62005413-RA	AUR62001075-RA	AUR62039712-RA
	AUR62008167-RA	AUR62007035-RA	AUR62036107-RA;AUR62019528-RA;AUR62018061-RA;AUR62015260-RA	AUR62007680-RA	AUR62012455-RA	AUR62039712-RA
	AUR62021879-RA;AUR62012777-RA	AUR62041095-RA;AUR62037855-RA	AUR62035844-RA;AUR62027633-RA	AUR62006617-RA;AUR62000269-RA	AUR62038006-RA;AUR62023326-RA	AUR62039712-RA
	AUR62027453-RA	AUR62040931-RA	AUR62034234-RA;AUR62029353-RA	AUR62006113-RA	AUR62006924-RA;AUR62000571-RA	AUR62039712-RA
	AUR62038358-RA	AUR62036328-RA	AUR62033478-RA	AUR62001075-RA	AUR62034362-RA;AUR62022344-RA	AUR62039712-RA
	AUR62033121-RA;AUR62008645-RA	AUR62035156-RA	AUR62033373-RA;AUR62004284-RA	AUR62024246-RA	AUR62015315-RA;AUR62012017-RA	AUR62039712-RA
	AUR62013047-RA	AUR62035152-RA	AUR62032721-RA;AUR62005041-RA;AUR62000929-RA	AUR62042607-RA;AUR62040781-RA	AUR62008838-RA	AUR62039712-RA
	AUR62043914-RA	AUR62033322-RA;AUR62004322-RA	AUR62032437-RA;AUR62024784-RA	AUR62038697-RA	AUR62037980-RA	AUR62039712-RA
	AUR62034822-RA;AUR62029560-RA;AUR62005532-RA	AUR62032690-RA	AUR62030862-RA;AUR62027021-RA	AUR62024766-RA	AUR62039730-RA	AUR62039712-RA
	AUR62033339-RA;AUR62033320-RA;AUR62017250-RA;AUR62010608-RA;AUR62004325-RA	AUR62032629-RA	AUR62029281-RA	AUR62016195-RA	AUR62038408-RA;AUR62036293-RA	AUR62039712-RA
	AUR62042344-RA	AUR62032517-RA;AUR62017449-RA	AUR62028913-RA;AUR62005636-RA	AUR62044410-RA;AUR62044404-RA;AUR62040446-RA	AUR62032437-RA;AUR62024784-RA	AUR62039712-RA
	AUR62021165-RA;AUR62015959-RA	AUR62032414-RA	AUR62028826-RA;AUR62005735-RA	AUR62007701-RA	AUR62000069-RA	AUR62039712-RA
	AUR62030921-RA;AUR62027082-RA	AUR62031998-RA;AUR62018096-RA	AUR62028718-RA;AUR62008136-RA	AUR62023153-RA	AUR62025100-RA	AUR62039712-RA
	AUR62020095-RA	AUR62031128-RA;AUR62014921-RA	AUR62028618-RA	AUR62035946-RA;AUR62022524-RA	AUR62042473-RA	AUR62039712-RA
	AUR62024510-RA	AUR62030785-RA;AUR62030508-RA	AUR62028381-RA	AUR62029910-RA	AUR62025417-RA;AUR62008824-RA	AUR62031771-RA;AUR62030778-RA;AUR62030515-RA;AUR62023973-RA
	AUR62028826-RA	AUR62029164-RA	AUR62028282-RA;AUR62025278-RA	AUR62034362-RA;AUR62022344-RA	AUR62026974-RA	AUR62031771-RA;AUR62030778-RA;AUR62030515-RA;AUR62023973-RA
	AUR62017846-RA;AUR62003531-RA	AUR62024208-RA;AUR62005529-RA	AUR62026104-RA;AUR62024513-RA	AUR62003352-RA	AUR62025434-RA	AUR62031771-RA;AUR62030778-RA;AUR62030515-RA;AUR62023973-RA
	AUR62021750-RA;AUR62008347-RA	AUR62024200-RA;AUR62005539-RA	AUR62025502-RA;AUR62008736-RA	AUR62028336-RA;AUR62025327-RA;AUR62016463-RA;AUR62011632-RA	AUR62015531-RA;AUR62002178-RA	AUR62031771-RA;AUR62030778-RA;AUR62030515-RA;AUR62023973-RA
	AUR62015435-RA;AUR62002222-RA	AUR62021932-RA;AUR62012724-RA	AUR62024329-RA;AUR62012068-RA	AUR62009692-RA;AUR62001895-RA	AUR62019220-RA	AUR62031771-RA;AUR62030778-RA;AUR62030515-RA;AUR62023973-RA
	AUR62019512-RA	AUR62020744-RA	AUR62024246-RA	AUR62021422-RA;AUR62010904-RA	AUR62009815-RA	AUR62031771-RA;AUR62030778-RA;AUR62030515-RA;AUR62023973-RA
	AUR62002757-RA	AUR62017264-RA;AUR62010620-RA	AUR62023869-RA	AUR62040822-RA	AUR62041164-RA;AUR62029290-RA	AUR62031771-RA;AUR62030778-RA;AUR62030515-RA;AUR62023973-RA
	AUR62043067-RA	AUR62017225-RA	AUR62022675-RA	AUR62017620-RA;AUR62015168-RA	AUR62006646-RA;AUR62000299-RA	AUR62031771-RA;AUR62030778-RA;AUR62030515-RA;AUR62023973-RA
	AUR62007592-RA;AUR62004080-RA	AUR62017037-RA;AUR62014840-RA	AUR62022608-RA;AUR62004402-RA	AUR62034234-RA;AUR62029353-RA	AUR62020103-RA;AUR62001677-RA	AUR62031771-RA;AUR62030778-RA;AUR62030515-RA;AUR62023973-RA
	AUR62035089-RA;AUR62016172-RA	AUR62016621-RA	AUR62020987-RA	AUR62033988-RA;AUR62027493-RA	AUR62042882-RA;AUR62041213-RA	AUR62031771-RA;AUR62030778-RA;AUR62030515-RA;AUR62023973-RA
	AUR62028336-RA;AUR62025327-RA;AUR62016463-RA;AUR62011632-RA	AUR62016277-RA;AUR62003308-RA	AUR62020441-RA;AUR62015777-RA	AUR62006462-RA	AUR62035946-RA;AUR62022524-RA	AUR62031771-RA;AUR62030778-RA;AUR62030515-RA;AUR62023973-RA
	AUR62033106-RA	AUR62016133-RA	AUR62020252-RA;AUR62001530-RA	AUR62000069-RA	AUR62022158-RA;AUR62001164-RA	AUR62031771-RA;AUR62030778-RA;AUR62030515-RA;AUR62023973-RA
	AUR62020547-RA;AUR62015655-RA	AUR62015546-RA;AUR62002163-RA	AUR62019730-RA;AUR62010724-RA	AUR62003958-RA	AUR62031275-RA	AUR62031771-RA;AUR62030778-RA;AUR62030515-RA;AUR62023973-RA
	AUR62020060-RA;AUR62001721-RA	AUR62013613-RA;AUR62007850-RA;AUR62004235-RA	AUR62018079-RA	AUR62028990-RA	AUR62044486-RA	AUR62031771-RA;AUR62030778-RA;AUR62030515-RA;AUR62023973-RA
	AUR62033440-RA;AUR62011063-RA	AUR62011683-RA	AUR62017210-RA;AUR62003405-RA	AUR62040947-RA;AUR62038379-RA	AUR62000307-RA	AUR62000840-RA
	AUR62033140-RA;AUR62008631-RA	AUR62007591-RA;AUR62004079-RA	AUR62016229-RA	AUR62025532-RA;AUR62008699-RA	AUR62033373-RA;AUR62004284-RA	AUR62000840-RA
	AUR62004300-RA	AUR62006581-RA	AUR62015995-RA	AUR62039254-RA;AUR62016236-RA	AUR62018092-RA	AUR62000840-RA
	AUR62022079-RA;AUR62001251-RA	AUR62005041-RA;AUR62000929-RA	AUR62014657-RA;AUR62012537-RA	AUR62022942-RA;AUR62012303-RA	AUR62025717-RA;AUR62001287-RA	AUR62000840-RA
	AUR62039633-RA	AUR62002272-RA	AUR62013225-RA;AUR62010245-RA	AUR62031576-RA	AUR62038283-RA;AUR62034683-RA	AUR62000840-RA
	AUR62029173-RA;AUR62029170-RA;AUR62029169-RA;AUR62029165-RA;AUR62029164-RA;AUR62014966-RA;AUR62014963-RA;AUR62014962-RA;AUR62014961-RA	AUR62044519-RA;AUR62009693-RA;AUR62001896-RA	AUR62013121-RA;AUR62010125-RA	AUR62012719-RA	AUR62023263-RA;AUR62023216-RA	AUR62000840-RA
	AUR62037821-RA;AUR62017433-RA	AUR62043776-RA;AUR62016137-RA	AUR62008167-RA	AUR62025616-RA;AUR62001405-RA	AUR62034721-RA;AUR62033664-RA	AUR62000840-RA
	AUR62036933-RA;AUR62032176-RA	AUR62041604-RA;AUR62040637-RA	AUR62008040-RA	AUR62035925-RA;AUR62035324-RA	AUR62028706-RA	AUR62000840-RA
	AUR62013389-RA	AUR62040949-RA;AUR62038378-RA	AUR62006528-RA	AUR62012226-RA	AUR62044660-RA;AUR62011287-RA	AUR62000840-RA
	AUR62030292-RA	AUR62040907-RA;AUR62019168-RA	AUR62001075-RA	AUR62001762-RA	AUR62031064-RA;AUR62008302-RA	AUR62000840-RA
	AUR62014945-RA	AUR62039625-RA;AUR62024994-RA	AUR62000773-RA	AUR62041619-RA;AUR62036002-RA	AUR62031599-RA;AUR62012473-RA	AUR62000840-RA
	AUR62021363-RA	AUR62039184-RA;AUR62037644-RA	AUR62037667-RA	AUR62017225-RA;AUR62010584-RA	AUR62020935-RA;AUR62018485-RA	AUR62000840-RA
	AUR62038934-RA	AUR62038273-RA;AUR62003961-RA	AUR62017225-RA;AUR62010584-RA	AUR62040776-RA	AUR62043839-RA;AUR62041922-RA	AUR62000840-RA
	AUR62023375-RA;AUR62013781-RA	AUR62037745-RA	AUR62027454-RA	AUR62028824-RA		AUR62000840-RA
		AUR62037147-RA;AUR62025072-RA	AUR62017545-RA	AUR62036676-RA;AUR62036675-RA;AUR62034593-RA;AUR62029241-RA;AUR62015631-RA;AUR62014621-RA;AUR62012580-RA;AUR62005072-RA;AUR62000903-RA		AUR62000840-RA
		AUR62035844-RA;AUR62027633-RA	AUR62023712-RA	AUR62043927-RA;AUR62019158-RA		AUR62000840-RA
		AUR62034564-RA;AUR62033417-RA;AUR62014435-RA;AUR62011041-RA	AUR62027288-RA;AUR62007446-RA	AUR62037830-RA		AUR62033661-RA
		AUR62033748-RA;AUR62029939-RA	AUR62006587-RA;AUR62000240-RA			AUR62033661-RA
		AUR62033463-RA;AUR62011081-RA	AUR62014787-RA			AUR62033661-RA
		AUR62032437-RA;AUR62024784-RA	AUR62034564-RA;AUR62033417-RA;AUR62014435-RA;AUR62011041-RA			AUR62033661-RA
		AUR62031433-RA;AUR62021108-RA	AUR62019907-RA;AUR62007043-RA			AUR62033661-RA
		AUR62031064-RA;AUR62008302-RA	AUR62026969-RA			AUR62033661-RA
		AUR62030104-RA	AUR62039740-RA;AUR62011274-RA			AUR62033661-RA
		AUR62029281-RA	AUR62042348-RA;AUR62001625-RA			AUR62033661-RA
		AUR62028618-RA	AUR62031100-RA;AUR62014895-RA			AUR62033661-RA
		AUR62027277-RA;AUR62007455-RA	AUR62037200-RA;AUR62026849-RA			AUR62033661-RA
		AUR62027171-RA;AUR62003290-RA	AUR62036943-RA			AUR62033661-RA
		AUR62027120-RA;AUR62012896-RA	AUR62030104-RA			AUR62033661-RA
		AUR62026484-RA;AUR62026290-RA	AUR62009692-RA;AUR62001895-RA			AUR62033661-RA
		AUR62026162-RA;AUR62013252-RA;AUR62010272-RA	AUR62024093-RA			AUR62033661-RA
		AUR62026104-RA;AUR62024513-RA	AUR62020111-RA			AUR62018166-RA
		AUR62023869-RA	AUR62006286-RA			AUR62018166-RA
		AUR62022675-RA	AUR62006832-RA;AUR62000488-RA			AUR62018166-RA
		AUR62021558-RA;AUR62008532-RA	AUR62038254-RA;AUR62003938-RA			AUR62018166-RA
		AUR62021547-RA;AUR62008546-RA	AUR62022201-RA			AUR62018166-RA
		AUR62020350-RA;AUR62015873-RA;AUR62010687-RA	AUR62029660-RA			AUR62018166-RA
		AUR62020045-RA;AUR62001730-RA	AUR62024208-RA;AUR62005529-RA			AUR62018166-RA
		AUR62017846-RA;AUR62003531-RA	AUR62022935-RA			AUR62018166-RA
		AUR62017594-RA	AUR62036197-RA;AUR62009748-RA			AUR62018166-RA
		AUR62014075-RA;AUR62005413-RA	AUR62027628-RA			AUR62018166-RA
		AUR62012986-RA;AUR62009998-RA	AUR62043927-RA;AUR62019158-RA;AUR62014422-RA			AUR62018166-RA
		AUR62012216-RA	AUR62042981-RA;AUR62034681-RA			AUR62018166-RA
		AUR62009794-RA	AUR62023299-RA;AUR62009003-RA			AUR62018166-RA
		AUR62009427-RA	AUR62002757-RA			AUR62000673-RA
		AUR62007757-RA;AUR62002952-RA	AUR62026799-RA			AUR62000673-RA
		AUR62006875-RA;AUR62000528-RA	AUR62008570-RA			AUR62000673-RA
		AUR62006748-RA;AUR62000392-RA	AUR62016195-RA			AUR62000673-RA
		AUR62006630-RA;AUR62002354-RA;AUR62000282-RA	AUR62037072-RA;AUR62036503-RA			AUR62000673-RA
		AUR62006534-RA;AUR62000182-RA	AUR62011026-RA			AUR62000673-RA
		AUR62004928-RA;AUR62001023-RA	AUR62018654-RA			AUR62000673-RA
		AUR62001075-RA	AUR62028349-RA;AUR62025346-RA			AUR62000673-RA
		AUR62028208-RA;AUR62002090-RA	AUR62020915-RA;AUR62018504-RA			AUR62000673-RA
		AUR62012654-RA	AUR62007169-RA			AUR62000673-RA
		AUR62036159-RA	AUR62005139-RA			AUR62000673-RA
		AUR62016604-RA;AUR62011453-RA	AUR62020160-RA;AUR62001618-RA			AUR62000673-RA
		AUR62018954-RA	AUR62027252-RA			AUR62039374-RA
		AUR62032963-RA	AUR62023348-RA;AUR62018760-RA;AUR62013809-RA;AUR62007240-RA			AUR62039374-RA
		AUR62024018-RA	AUR62034535-RA			AUR62039374-RA
		AUR62034803-RA;AUR62029539-RA	AUR62014075-RA;AUR62005413-RA			AUR62039374-RA
		AUR62007107-RA	AUR62016727-RA;AUR62011334-RA			AUR62039374-RA
		AUR62014498-RA				AUR62039374-RA
		AUR62021766-RA;AUR62008333-RA				AUR62039374-RA
		AUR62034822-RA;AUR62029560-RA;AUR62029558-RA;AUR62005532-RA				AUR62039374-RA
		AUR62016737-RA;AUR62011323-RA				AUR62039374-RA
		AUR62035089-RA;AUR62016172-RA				AUR62039374-RA
		AUR62030462-RA;AUR62010451-RA				AUR62039374-RA
		AUR62020100-RA;AUR62001682-RA				AUR62039374-RA
		AUR62037848-RA				AUR62039374-RA
		AUR62023452-RA				AUR62009382-RA
		AUR62028913-RA;AUR62005636-RA				AUR62009382-RA
		AUR62040621-RA				AUR62009382-RA
		AUR62001164-RA				AUR62009382-RA
		AUR62032224-RA;AUR62032222-RA				AUR62009382-RA
		AUR62014540-RA;AUR62008963-RA				AUR62009382-RA
		AUR62027298-RA				AUR62009382-RA
		AUR62024917-RA				AUR62009382-RA
		AUR62035923-RA;AUR62035325-RA				AUR62009382-RA
		AUR62043393-RA;AUR62041708-RA;AUR62009294-RA				AUR62009382-RA
		AUR62025100-RA				AUR62009382-RA
		AUR62033832-RA				AUR62009382-RA
		AUR62016740-RA;AUR62011317-RA				AUR62035262-RA;AUR62002903-RA
		AUR62023081-RA				AUR62035262-RA;AUR62002903-RA
		AUR62021869-RA;AUR62012785-RA				AUR62035262-RA;AUR62002903-RA
		AUR62023263-RA;AUR62023216-RA				AUR62035262-RA;AUR62002903-RA
		AUR62018760-RA				AUR62035262-RA;AUR62002903-RA
		AUR62020995-RA				AUR62035262-RA;AUR62002903-RA
		AUR62019916-RA;AUR62007052-RA				AUR62035262-RA;AUR62002903-RA
		AUR62017612-RA;AUR62015160-RA				AUR62035262-RA;AUR62002903-RA
						AUR62035262-RA;AUR62002903-RA
						AUR62035262-RA;AUR62002903-RA
						AUR62035262-RA;AUR62002903-RA
						AUR62035262-RA;AUR62002903-RA
						AUR62035262-RA;AUR62002903-RA
						AUR62035262-RA;AUR62002903-RA
						AUR62035262-RA;AUR62002903-RA
						AUR62035262-RA;AUR62002903-RA
						AUR62033162-RA
						AUR62033162-RA
						AUR62033162-RA
						AUR62033162-RA
						AUR62033162-RA
						AUR62033162-RA
						AUR62033162-RA
						AUR62033162-RA
						AUR62033162-RA
						AUR62033162-RA
						AUR62033162-RA
						AUR62033162-RA
						AUR62033162-RA
						AUR62010443-RA
						AUR62010443-RA
						AUR62010443-RA
						AUR62010443-RA
						AUR62010443-RA
						AUR62010443-RA
						AUR62010443-RA
						AUR62010443-RA
						AUR62010443-RA
						AUR62010443-RA
						AUR62010443-RA
						AUR62009617-RA
						AUR62009617-RA
						AUR62009617-RA
						AUR62009617-RA
						AUR62009617-RA
						AUR62009617-RA
						AUR62009617-RA
						AUR62009617-RA
						AUR62009617-RA
						AUR62009617-RA
						AUR62009617-RA
						AUR62009617-RA
						AUR62009617-RA
						AUR62009617-RA
						AUR62040536-RA
						AUR62040536-RA
						AUR62040536-RA
						AUR62040536-RA
						AUR62040536-RA
						AUR62040536-RA
						AUR62040536-RA
						AUR62040536-RA
						AUR62040536-RA
						AUR62040536-RA
						AUR62040536-RA
						AUR62043788-RA;AUR62042354-RA
						AUR62043788-RA;AUR62042354-RA
						AUR62043788-RA;AUR62042354-RA
						AUR62043788-RA;AUR62042354-RA
						AUR62043788-RA;AUR62042354-RA
						AUR62043788-RA;AUR62042354-RA
						AUR62043788-RA;AUR62042354-RA
						AUR62043788-RA;AUR62042354-RA
						AUR62043788-RA;AUR62042354-RA
						AUR62043788-RA;AUR62042354-RA
						AUR62043788-RA;AUR62042354-RA
						AUR62043788-RA;AUR62042354-RA
						AUR62043788-RA;AUR62042354-RA
						AUR62040969-RA
						AUR62040969-RA
						AUR62040969-RA
						AUR62040969-RA
						AUR62040969-RA
						AUR62040969-RA
						AUR62040969-RA
						AUR62040969-RA
						AUR62040969-RA
						AUR62040969-RA
						AUR62040969-RA
						AUR62040969-RA
						AUR62014124-RA;AUR62002760-RA
						AUR62014124-RA;AUR62002760-RA
						AUR62014124-RA;AUR62002760-RA
						AUR62014124-RA;AUR62002760-RA
						AUR62014124-RA;AUR62002760-RA
						AUR62014124-RA;AUR62002760-RA
						AUR62014124-RA;AUR62002760-RA
						AUR62014124-RA;AUR62002760-RA
						AUR62014124-RA;AUR62002760-RA
						AUR62014124-RA;AUR62002760-RA
						AUR62014124-RA;AUR62002760-RA
						AUR62014124-RA;AUR62002760-RA
						AUR62013085-RA
						AUR62013085-RA
						AUR62013085-RA
						AUR62013085-RA
						AUR62013085-RA
						AUR62013085-RA
						AUR62013085-RA
						AUR62013085-RA
						AUR62013085-RA
						AUR62013085-RA
						AUR62013085-RA
						AUR62013085-RA
						AUR62013085-RA
						AUR62009632-RA
						AUR62009632-RA
						AUR62009632-RA
						AUR62009632-RA
						AUR62009632-RA
						AUR62009632-RA
						AUR62009632-RA
						AUR62009632-RA
						AUR62009632-RA
						AUR62009632-RA
						AUR62009632-RA
						AUR62009632-RA
						AUR62009632-RA
						AUR62017741-RA
						AUR62017741-RA
						AUR62017741-RA
						AUR62017741-RA
						AUR62017741-RA
						AUR62017741-RA
						AUR62017741-RA
						AUR62017741-RA
						AUR62017741-RA
						AUR62017741-RA
						AUR62017741-RA
						AUR62017741-RA
						AUR62017741-RA
						AUR62027800-RA
						AUR62027800-RA
						AUR62027800-RA
						AUR62027800-RA
						AUR62027800-RA
						AUR62027800-RA
						AUR62027800-RA
						AUR62027800-RA
						AUR62027800-RA
						AUR62027800-RA
						AUR62003403-RA
						AUR62003403-RA
						AUR62003403-RA
						AUR62003403-RA
						AUR62003403-RA
						AUR62003403-RA
						AUR62003403-RA
						AUR62003403-RA
						AUR62003403-RA
						AUR62033399-RA
						AUR62033399-RA
						AUR62033399-RA
						AUR62033399-RA
						AUR62033399-RA
						AUR62033399-RA
						AUR62033399-RA
						AUR62033399-RA
						AUR62033399-RA
						AUR62033399-RA
						AUR62005272-RA
						AUR62005272-RA
						AUR62005272-RA
						AUR62005272-RA
						AUR62005272-RA
						AUR62005272-RA
						AUR62005272-RA
						AUR62005272-RA
						AUR62005272-RA
						AUR62005272-RA
						AUR62005272-RA
						AUR62005328-RA
						AUR62005328-RA
						AUR62005328-RA
						AUR62005328-RA
						AUR62005328-RA
						AUR62005328-RA
						AUR62005328-RA
						AUR62005328-RA
						AUR62005328-RA
						AUR62005328-RA
						AUR62041482-RA;AUR62040542-RA
						AUR62041482-RA;AUR62040542-RA
						AUR62041482-RA;AUR62040542-RA
						AUR62041482-RA;AUR62040542-RA
						AUR62041482-RA;AUR62040542-RA
						AUR62041482-RA;AUR62040542-RA
						AUR62041482-RA;AUR62040542-RA
						AUR62041482-RA;AUR62040542-RA
						AUR62038194-RA
						AUR62038194-RA
						AUR62038194-RA
						AUR62038194-RA
						AUR62038194-RA
						AUR62038194-RA
						AUR62038194-RA
						AUR62038194-RA
						AUR62038194-RA
						AUR62038194-RA
						AUR62038194-RA
						AUR62038194-RA
						AUR62038194-RA
						AUR62038194-RA
						AUR62037132-RA;AUR62025125-RA
						AUR62037132-RA;AUR62025125-RA
						AUR62037132-RA;AUR62025125-RA
						AUR62037132-RA;AUR62025125-RA
						AUR62037132-RA;AUR62025125-RA
						AUR62037132-RA;AUR62025125-RA
						AUR62037132-RA;AUR62025125-RA
						AUR62037132-RA;AUR62025125-RA
						AUR62037132-RA;AUR62025125-RA
						AUR62037132-RA;AUR62025125-RA
						AUR62018235-RA
						AUR62018235-RA
						AUR62018235-RA
						AUR62018235-RA
						AUR62018235-RA
						AUR62018235-RA
						AUR62018235-RA
						AUR62018235-RA
						AUR62018235-RA
						AUR62018034-RA
						AUR62018034-RA
						AUR62018034-RA
						AUR62018034-RA
						AUR62018034-RA
						AUR62018034-RA
						AUR62018034-RA
						AUR62018034-RA
						AUR62018034-RA
						AUR62018034-RA
						AUR62014840-RA
						AUR62014840-RA
						AUR62014840-RA
						AUR62014840-RA
						AUR62014840-RA
						AUR62014840-RA
						AUR62014840-RA
						AUR62014840-RA
						AUR62014840-RA
						AUR62014840-RA
						AUR62014840-RA
						AUR62018191-RA
						AUR62018191-RA
						AUR62018191-RA
						AUR62018191-RA
						AUR62018191-RA
						AUR62018191-RA
						AUR62018191-RA
						AUR62018191-RA
						AUR62018191-RA
						AUR62013484-RA
						AUR62013484-RA
						AUR62013484-RA
						AUR62013484-RA
						AUR62013484-RA
						AUR62013484-RA
						AUR62013484-RA
						AUR62013484-RA
						AUR62013484-RA
						AUR62013484-RA
						AUR62013484-RA
						AUR62027857-RA;AUR62019015-RA
						AUR62027857-RA;AUR62019015-RA
						AUR62027857-RA;AUR62019015-RA
						AUR62027857-RA;AUR62019015-RA
						AUR62027857-RA;AUR62019015-RA
						AUR62027857-RA;AUR62019015-RA
						AUR62027857-RA;AUR62019015-RA
						AUR62027857-RA;AUR62019015-RA
						AUR62027857-RA;AUR62019015-RA
						AUR62042049-RA;AUR62038585-RA
						AUR62042049-RA;AUR62038585-RA
						AUR62042049-RA;AUR62038585-RA
						AUR62042049-RA;AUR62038585-RA
						AUR62042049-RA;AUR62038585-RA
						AUR62042049-RA;AUR62038585-RA
						AUR62042049-RA;AUR62038585-RA
						AUR62042049-RA;AUR62038585-RA
						AUR62042049-RA;AUR62038585-RA
						AUR62021576-RA
						AUR62021576-RA
						AUR62021576-RA
						AUR62021576-RA
						AUR62021576-RA
						AUR62021576-RA
						AUR62021576-RA
						AUR62021576-RA
						AUR62021576-RA
						AUR62037914-RA
						AUR62037914-RA
						AUR62037914-RA
						AUR62037914-RA
						AUR62037914-RA
						AUR62037914-RA
						AUR62037914-RA
						AUR62037914-RA
						AUR62037914-RA
						AUR62037914-RA
						AUR62006360-RA
						AUR62006360-RA
						AUR62006360-RA
						AUR62006360-RA
						AUR62006360-RA
						AUR62006360-RA
						AUR62006360-RA
						AUR62006360-RA
						AUR62006360-RA
						AUR62028474-RA;AUR62006239-RA
						AUR62028474-RA;AUR62006239-RA
						AUR62028474-RA;AUR62006239-RA
						AUR62028474-RA;AUR62006239-RA
						AUR62028474-RA;AUR62006239-RA
						AUR62028474-RA;AUR62006239-RA
						AUR62028474-RA;AUR62006239-RA
						AUR62028474-RA;AUR62006239-RA
						AUR62028474-RA;AUR62006239-RA
						AUR62028474-RA;AUR62006239-RA
						AUR62028474-RA;AUR62006239-RA
						AUR62028474-RA;AUR62006239-RA
						AUR62000839-RA
						AUR62000839-RA
						AUR62000839-RA
						AUR62000839-RA
						AUR62000839-RA
						AUR62000839-RA
						AUR62000839-RA
						AUR62000839-RA
						AUR62000839-RA
						AUR62000839-RA
						AUR62023299-RA
						AUR62023299-RA
						AUR62023299-RA
						AUR62023299-RA
						AUR62023299-RA
						AUR62023299-RA
						AUR62023299-RA
						AUR62023299-RA
						AUR62023299-RA
						AUR62040617-RA
						AUR62040617-RA
						AUR62040617-RA
						AUR62040617-RA
						AUR62040617-RA
						AUR62040617-RA
						AUR62040617-RA
						AUR62040617-RA
						AUR62040617-RA
						AUR62009602-RA
						AUR62009602-RA
						AUR62009602-RA
						AUR62009602-RA
						AUR62009602-RA
						AUR62009602-RA
						AUR62009602-RA
						AUR62009602-RA
						AUR62028591-RA
						AUR62028591-RA
						AUR62028591-RA
						AUR62028591-RA
						AUR62028591-RA
						AUR62028591-RA
						AUR62028591-RA
						AUR62028591-RA
						AUR62028591-RA
						AUR62028591-RA
						AUR62028591-RA
						AUR62028591-RA
						AUR62008524-RA
						AUR62008524-RA
						AUR62008524-RA
						AUR62008524-RA
						AUR62008524-RA
						AUR62008524-RA
						AUR62008524-RA
						AUR62008524-RA
						AUR62008524-RA
						AUR62006386-RA
						AUR62006386-RA
						AUR62006386-RA
						AUR62006386-RA
						AUR62006386-RA
						AUR62006386-RA
						AUR62006386-RA
						AUR62006386-RA
						AUR62006386-RA
						AUR62007473-RA
						AUR62007473-RA
						AUR62007473-RA
						AUR62007473-RA
						AUR62007473-RA
						AUR62007473-RA
						AUR62007473-RA
						AUR62007473-RA
						AUR62027167-RA;AUR62003295-RA
						AUR62027167-RA;AUR62003295-RA
						AUR62027167-RA;AUR62003295-RA
						AUR62027167-RA;AUR62003295-RA
						AUR62027167-RA;AUR62003295-RA
						AUR62027167-RA;AUR62003295-RA
						AUR62027167-RA;AUR62003295-RA
						AUR62027167-RA;AUR62003295-RA
						AUR62030687-RA
						AUR62030687-RA
						AUR62030687-RA
						AUR62030687-RA
						AUR62030687-RA
						AUR62030687-RA
						AUR62030687-RA
						AUR62030687-RA
						AUR62030687-RA
						AUR62043190-RA;AUR62019569-RA
						AUR62043190-RA;AUR62019569-RA
						AUR62043190-RA;AUR62019569-RA
						AUR62043190-RA;AUR62019569-RA
						AUR62043190-RA;AUR62019569-RA
						AUR62043190-RA;AUR62019569-RA
						AUR62043190-RA;AUR62019569-RA
						AUR62043190-RA;AUR62019569-RA
						AUR62016100-RA
						AUR62016100-RA
						AUR62016100-RA
						AUR62016100-RA
						AUR62016100-RA
						AUR62016100-RA
						AUR62016100-RA
						AUR62016100-RA
						AUR62016100-RA
						AUR62031370-RA
						AUR62031370-RA
						AUR62031370-RA
						AUR62031370-RA
						AUR62031370-RA
						AUR62031370-RA
						AUR62031370-RA
						AUR62031370-RA
						AUR62031370-RA
						AUR62025011-RA
						AUR62025011-RA
						AUR62025011-RA
						AUR62025011-RA
						AUR62025011-RA
						AUR62025011-RA
						AUR62025011-RA
						AUR62020539-RA;AUR62015664-RA
						AUR62020539-RA;AUR62015664-RA
						AUR62020539-RA;AUR62015664-RA
						AUR62020539-RA;AUR62015664-RA
						AUR62020539-RA;AUR62015664-RA
						AUR62020539-RA;AUR62015664-RA
						AUR62020539-RA;AUR62015664-RA
						AUR62020539-RA;AUR62015664-RA
						AUR62020539-RA;AUR62015664-RA
						AUR62040757-RA;AUR62040756-RA;AUR62033034-RA
						AUR62040757-RA;AUR62040756-RA;AUR62033034-RA
						AUR62040757-RA;AUR62040756-RA;AUR62033034-RA
						AUR62040757-RA;AUR62040756-RA;AUR62033034-RA
						AUR62040757-RA;AUR62040756-RA;AUR62033034-RA
						AUR62040757-RA;AUR62040756-RA;AUR62033034-RA
						AUR62040757-RA;AUR62040756-RA;AUR62033034-RA
						AUR62040757-RA;AUR62040756-RA;AUR62033034-RA
						AUR62039535-RA
						AUR62039535-RA
						AUR62039535-RA
						AUR62039535-RA
						AUR62039535-RA
						AUR62039535-RA
						AUR62039535-RA
						AUR62039535-RA
						AUR62039535-RA
						AUR62009520-RA;AUR62009519-RA
						AUR62009520-RA;AUR62009519-RA
						AUR62009520-RA;AUR62009519-RA
						AUR62009520-RA;AUR62009519-RA
						AUR62009520-RA;AUR62009519-RA
						AUR62009520-RA;AUR62009519-RA
						AUR62009520-RA;AUR62009519-RA
						AUR62009520-RA;AUR62009519-RA
						AUR62026025-RA;AUR62024433-RA
						AUR62026025-RA;AUR62024433-RA
						AUR62026025-RA;AUR62024433-RA
						AUR62026025-RA;AUR62024433-RA
						AUR62026025-RA;AUR62024433-RA
						AUR62026025-RA;AUR62024433-RA
						AUR62026025-RA;AUR62024433-RA
						AUR62016761-RA;AUR62011297-RA
						AUR62016761-RA;AUR62011297-RA
						AUR62016761-RA;AUR62011297-RA
						AUR62016761-RA;AUR62011297-RA
						AUR62016761-RA;AUR62011297-RA
						AUR62016761-RA;AUR62011297-RA
						AUR62016761-RA;AUR62011297-RA
						AUR62016761-RA;AUR62011297-RA
						AUR62031065-RA;AUR62008303-RA
						AUR62031065-RA;AUR62008303-RA
						AUR62031065-RA;AUR62008303-RA
						AUR62031065-RA;AUR62008303-RA
						AUR62031065-RA;AUR62008303-RA
						AUR62031065-RA;AUR62008303-RA
						AUR62031065-RA;AUR62008303-RA
						AUR62030627-RA
						AUR62030627-RA
						AUR62030627-RA
						AUR62030627-RA
						AUR62030627-RA
						AUR62030627-RA
						AUR62030627-RA
						AUR62019845-RA
						AUR62019845-RA
						AUR62019845-RA
						AUR62019845-RA
						AUR62019845-RA
						AUR62019845-RA
						AUR62019845-RA
						AUR62006284-RA
						AUR62006284-RA
						AUR62006284-RA
						AUR62006284-RA
						AUR62006284-RA
						AUR62006284-RA
						AUR62006284-RA
						AUR62006284-RA
						AUR62032333-RA;AUR62028608-RA;AUR62023978-RA
						AUR62032333-RA;AUR62028608-RA;AUR62023978-RA
						AUR62032333-RA;AUR62028608-RA;AUR62023978-RA
						AUR62032333-RA;AUR62028608-RA;AUR62023978-RA
						AUR62032333-RA;AUR62028608-RA;AUR62023978-RA
						AUR62032333-RA;AUR62028608-RA;AUR62023978-RA
						AUR62032333-RA;AUR62028608-RA;AUR62023978-RA
						AUR62032333-RA;AUR62028608-RA;AUR62023978-RA
						AUR62032333-RA;AUR62028608-RA;AUR62023978-RA
						AUR62033260-RA;AUR62021346-RA
						AUR62033260-RA;AUR62021346-RA
						AUR62033260-RA;AUR62021346-RA
						AUR62033260-RA;AUR62021346-RA
						AUR62033260-RA;AUR62021346-RA
						AUR62033260-RA;AUR62021346-RA
						AUR62033260-RA;AUR62021346-RA
						AUR62033617-RA;AUR62032727-RA;AUR62028108-RA;AUR62005958-RA
						AUR62033617-RA;AUR62032727-RA;AUR62028108-RA;AUR62005958-RA
						AUR62033617-RA;AUR62032727-RA;AUR62028108-RA;AUR62005958-RA
						AUR62033617-RA;AUR62032727-RA;AUR62028108-RA;AUR62005958-RA
						AUR62033617-RA;AUR62032727-RA;AUR62028108-RA;AUR62005958-RA
						AUR62033617-RA;AUR62032727-RA;AUR62028108-RA;AUR62005958-RA
						AUR62003182-RA
						AUR62003182-RA
						AUR62003182-RA
						AUR62003182-RA
						AUR62003182-RA
						AUR62003182-RA
						AUR62003182-RA
						AUR62003182-RA
						AUR62032217-RA
						AUR62032217-RA
						AUR62032217-RA
						AUR62032217-RA
						AUR62032217-RA
						AUR62032217-RA
						AUR62032217-RA
						AUR62030233-RA;AUR62028806-RA;AUR62027613-RA;AUR62005753-RA
						AUR62030233-RA;AUR62028806-RA;AUR62027613-RA;AUR62005753-RA
						AUR62030233-RA;AUR62028806-RA;AUR62027613-RA;AUR62005753-RA
						AUR62030233-RA;AUR62028806-RA;AUR62027613-RA;AUR62005753-RA
						AUR62030233-RA;AUR62028806-RA;AUR62027613-RA;AUR62005753-RA
						AUR62030233-RA;AUR62028806-RA;AUR62027613-RA;AUR62005753-RA
						AUR62030233-RA;AUR62028806-RA;AUR62027613-RA;AUR62005753-RA
						AUR62012737-RA
						AUR62012737-RA
						AUR62012737-RA
						AUR62012737-RA
						AUR62012737-RA
						AUR62012737-RA
						AUR62012737-RA
						AUR62039178-RA
						AUR62039178-RA
						AUR62039178-RA
						AUR62039178-RA
						AUR62039178-RA
						AUR62039178-RA
						AUR62039178-RA
						AUR62039178-RA
						AUR62039178-RA
						AUR62039178-RA
						AUR62016506-RA
						AUR62016506-RA
						AUR62016506-RA
						AUR62016506-RA
						AUR62016506-RA
						AUR62016506-RA
						AUR62016506-RA
						AUR62009118-RA
						AUR62009118-RA
						AUR62009118-RA
						AUR62009118-RA
						AUR62009118-RA
						AUR62009118-RA
						AUR62009118-RA
						AUR62030674-RA
						AUR62030674-RA
						AUR62030674-RA
						AUR62030674-RA
						AUR62030674-RA
						AUR62030674-RA
						AUR62030674-RA
						AUR62032060-RA
						AUR62032060-RA
						AUR62032060-RA
						AUR62032060-RA
						AUR62032060-RA
						AUR62032060-RA
						AUR62032060-RA
						AUR62004702-RA
						AUR62004702-RA
						AUR62004702-RA
						AUR62004702-RA
						AUR62004702-RA
						AUR62004702-RA
						AUR62004702-RA
						AUR62019063-RA
						AUR62019063-RA
						AUR62019063-RA
						AUR62019063-RA
						AUR62019063-RA
						AUR62019063-RA
						AUR62019063-RA
						AUR62019063-RA
						AUR62034332-RA
						AUR62034332-RA
						AUR62034332-RA
						AUR62034332-RA
						AUR62034332-RA
						AUR62034332-RA
						AUR62034332-RA
						AUR62041432-RA;AUR62033562-RA
						AUR62041432-RA;AUR62033562-RA
						AUR62041432-RA;AUR62033562-RA
						AUR62041432-RA;AUR62033562-RA
						AUR62041432-RA;AUR62033562-RA
						AUR62041432-RA;AUR62033562-RA
						AUR62010964-RA
						AUR62010964-RA
						AUR62010964-RA
						AUR62010964-RA
						AUR62010964-RA
						AUR62010964-RA
						AUR62010964-RA
						AUR62010964-RA
						AUR62028991-RA;AUR62025183-RA
						AUR62028991-RA;AUR62025183-RA
						AUR62028991-RA;AUR62025183-RA
						AUR62028991-RA;AUR62025183-RA
						AUR62028991-RA;AUR62025183-RA
						AUR62028991-RA;AUR62025183-RA
						AUR62040675-RA;AUR62036090-RA;AUR62019552-RA;AUR62015934-RA
						AUR62040675-RA;AUR62036090-RA;AUR62019552-RA;AUR62015934-RA
						AUR62040675-RA;AUR62036090-RA;AUR62019552-RA;AUR62015934-RA
						AUR62040675-RA;AUR62036090-RA;AUR62019552-RA;AUR62015934-RA
						AUR62040675-RA;AUR62036090-RA;AUR62019552-RA;AUR62015934-RA
						AUR62040675-RA;AUR62036090-RA;AUR62019552-RA;AUR62015934-RA
						AUR62025749-RA
						AUR62025749-RA
						AUR62025749-RA
						AUR62025749-RA
						AUR62025749-RA
						AUR62025749-RA
						AUR62025749-RA
						AUR62020213-RA
						AUR62020213-RA
						AUR62020213-RA
						AUR62020213-RA
						AUR62020213-RA
						AUR62020213-RA
						AUR62020213-RA
						AUR62015174-RA
						AUR62015174-RA
						AUR62015174-RA
						AUR62015174-RA
						AUR62015174-RA
						AUR62015174-RA
						AUR62007961-RA
						AUR62007961-RA
						AUR62007961-RA
						AUR62007961-RA
						AUR62007961-RA
						AUR62007961-RA
						AUR62009783-RA
						AUR62009783-RA
						AUR62009783-RA
						AUR62009783-RA
						AUR62009783-RA
						AUR62009783-RA
						AUR62009783-RA
						AUR62009783-RA
						AUR62013646-RA
						AUR62013646-RA
						AUR62013646-RA
						AUR62013646-RA
						AUR62013646-RA
						AUR62013646-RA
						AUR62013646-RA
						AUR62013646-RA
						AUR62006212-RA
						AUR62006212-RA
						AUR62006212-RA
						AUR62006212-RA
						AUR62006212-RA
						AUR62006212-RA
						AUR62006212-RA
						AUR62013094-RA
						AUR62013094-RA
						AUR62013094-RA
						AUR62013094-RA
						AUR62013094-RA
						AUR62013094-RA
						AUR62044431-RA;AUR62026662-RA
						AUR62044431-RA;AUR62026662-RA
						AUR62044431-RA;AUR62026662-RA
						AUR62044431-RA;AUR62026662-RA
						AUR62044431-RA;AUR62026662-RA
						AUR62044431-RA;AUR62026662-RA
						AUR62044431-RA;AUR62026662-RA
						AUR62037104-RA
						AUR62037104-RA
						AUR62037104-RA
						AUR62037104-RA
						AUR62037104-RA
						AUR62037104-RA
						AUR62037104-RA
						AUR62021118-RA
						AUR62021118-RA
						AUR62021118-RA
						AUR62021118-RA
						AUR62021118-RA
						AUR62021118-RA
						AUR62021118-RA
						AUR62021118-RA
						AUR62037884-RA
						AUR62037884-RA
						AUR62037884-RA
						AUR62037884-RA
						AUR62037884-RA
						AUR62037884-RA
						AUR62037884-RA
						AUR62037884-RA
						AUR62031576-RA
						AUR62031576-RA
						AUR62031576-RA
						AUR62031576-RA
						AUR62031576-RA
						AUR62024981-RA
						AUR62024981-RA
						AUR62024981-RA
						AUR62024981-RA
						AUR62024981-RA
						AUR62024981-RA
						AUR62037594-RA
						AUR62037594-RA
						AUR62037594-RA
						AUR62037594-RA
						AUR62037594-RA
						AUR62037594-RA
						AUR62009936-RA
						AUR62009936-RA
						AUR62009936-RA
						AUR62009936-RA
						AUR62009936-RA
						AUR62009936-RA
						AUR62008327-RA
						AUR62008327-RA
						AUR62008327-RA
						AUR62008327-RA
						AUR62008327-RA
						AUR62008327-RA
						AUR62008327-RA
						AUR62017103-RA
						AUR62017103-RA
						AUR62017103-RA
						AUR62017103-RA
						AUR62017103-RA
						AUR62009615-RA;AUR62001828-RA
						AUR62009615-RA;AUR62001828-RA
						AUR62009615-RA;AUR62001828-RA
						AUR62009615-RA;AUR62001828-RA
						AUR62009615-RA;AUR62001828-RA
						AUR62009615-RA;AUR62001828-RA
						AUR62009615-RA;AUR62001828-RA
						AUR62025915-RA
						AUR62025915-RA
						AUR62025915-RA
						AUR62025915-RA
						AUR62025915-RA
						AUR62005245-RA
						AUR62005245-RA
						AUR62005245-RA
						AUR62005245-RA
						AUR62005245-RA
						AUR62039001-RA
						AUR62039001-RA
						AUR62039001-RA
						AUR62039001-RA
						AUR62039001-RA
						AUR62035782-RA;AUR62035779-RA;AUR62035776-RA;AUR62027580-RA;AUR62027577-RA
						AUR62035782-RA;AUR62035779-RA;AUR62035776-RA;AUR62027580-RA;AUR62027577-RA
						AUR62035782-RA;AUR62035779-RA;AUR62035776-RA;AUR62027580-RA;AUR62027577-RA
						AUR62035782-RA;AUR62035779-RA;AUR62035776-RA;AUR62027580-RA;AUR62027577-RA
						AUR62035782-RA;AUR62035779-RA;AUR62035776-RA;AUR62027580-RA;AUR62027577-RA
						AUR62035782-RA;AUR62035779-RA;AUR62035776-RA;AUR62027580-RA;AUR62027577-RA
						AUR62036284-RA;AUR62028358-RA;AUR62028357-RA;AUR62025357-RA;AUR62010739-RA;AUR62010736-RA
						AUR62036284-RA;AUR62028358-RA;AUR62028357-RA;AUR62025357-RA;AUR62010739-RA;AUR62010736-RA
						AUR62036284-RA;AUR62028358-RA;AUR62028357-RA;AUR62025357-RA;AUR62010739-RA;AUR62010736-RA
						AUR62036284-RA;AUR62028358-RA;AUR62028357-RA;AUR62025357-RA;AUR62010739-RA;AUR62010736-RA
						AUR62036284-RA;AUR62028358-RA;AUR62028357-RA;AUR62025357-RA;AUR62010739-RA;AUR62010736-RA
						AUR62032014-RA
						AUR62032014-RA
						AUR62032014-RA
						AUR62032014-RA
						AUR62032014-RA
						AUR62032014-RA
						AUR62020441-RA
						AUR62020441-RA
						AUR62020441-RA
						AUR62020441-RA
						AUR62020441-RA
						AUR62020441-RA
						AUR62006384-RA
						AUR62006384-RA
						AUR62006384-RA
						AUR62006384-RA
						AUR62006384-RA
						AUR62006384-RA
						AUR62006384-RA
						AUR62006384-RA
						AUR62015570-RA
						AUR62015570-RA
						AUR62015570-RA
						AUR62015570-RA
						AUR62015570-RA
						AUR62015570-RA
						AUR62019540-RA
						AUR62019540-RA
						AUR62019540-RA
						AUR62019540-RA
						AUR62019540-RA
						AUR62042183-RA;AUR62042000-RA;AUR62040450-RA;AUR62024975-RA
						AUR62042183-RA;AUR62042000-RA;AUR62040450-RA;AUR62024975-RA
						AUR62042183-RA;AUR62042000-RA;AUR62040450-RA;AUR62024975-RA
						AUR62042183-RA;AUR62042000-RA;AUR62040450-RA;AUR62024975-RA
						AUR62042183-RA;AUR62042000-RA;AUR62040450-RA;AUR62024975-RA
						AUR62042183-RA;AUR62042000-RA;AUR62040450-RA;AUR62024975-RA
						AUR62042183-RA;AUR62042000-RA;AUR62040450-RA;AUR62024975-RA
						AUR62020547-RA
						AUR62020547-RA
						AUR62020547-RA
						AUR62020547-RA
						AUR62020547-RA
						AUR62042443-RA;AUR62009263-RA
						AUR62042443-RA;AUR62009263-RA
						AUR62042443-RA;AUR62009263-RA
						AUR62042443-RA;AUR62009263-RA
						AUR62042443-RA;AUR62009263-RA
						AUR62030151-RA;AUR62030147-RA;AUR62002691-RA;AUR62002690-RA
						AUR62030151-RA;AUR62030147-RA;AUR62002691-RA;AUR62002690-RA
						AUR62030151-RA;AUR62030147-RA;AUR62002691-RA;AUR62002690-RA
						AUR62030151-RA;AUR62030147-RA;AUR62002691-RA;AUR62002690-RA
						AUR62030151-RA;AUR62030147-RA;AUR62002691-RA;AUR62002690-RA
						AUR62030151-RA;AUR62030147-RA;AUR62002691-RA;AUR62002690-RA
						AUR62041904-RA;AUR62033900-RA
						AUR62041904-RA;AUR62033900-RA
						AUR62041904-RA;AUR62033900-RA
						AUR62041904-RA;AUR62033900-RA
						AUR62041904-RA;AUR62033900-RA
						AUR62013758-RA;AUR62013755-RA
						AUR62013758-RA;AUR62013755-RA
						AUR62013758-RA;AUR62013755-RA
						AUR62013758-RA;AUR62013755-RA
						AUR62013758-RA;AUR62013755-RA
						AUR62027317-RA;AUR62007415-RA
						AUR62027317-RA;AUR62007415-RA
						AUR62027317-RA;AUR62007415-RA
						AUR62027317-RA;AUR62007415-RA
						AUR62027317-RA;AUR62007415-RA
						AUR62027317-RA;AUR62007415-RA
						AUR62003418-RA
						AUR62003418-RA
						AUR62003418-RA
						AUR62003418-RA
						AUR62003418-RA
						AUR62025559-RA
						AUR62025559-RA
						AUR62025559-RA
						AUR62025559-RA
						AUR62025559-RA
						AUR62021100-RA
						AUR62021100-RA
						AUR62021100-RA
						AUR62021100-RA
						AUR62021100-RA
						AUR62032691-RA
						AUR62032691-RA
						AUR62032691-RA
						AUR62032691-RA
						AUR62032691-RA
						AUR62028839-RA;AUR62005716-RA
						AUR62028839-RA;AUR62005716-RA
						AUR62028839-RA;AUR62005716-RA
						AUR62028839-RA;AUR62005716-RA
						AUR62028839-RA;AUR62005716-RA
						AUR62027865-RA
						AUR62027865-RA
						AUR62027865-RA
						AUR62027865-RA
						AUR62027865-RA
						AUR62027865-RA
						AUR62005211-RA
						AUR62005211-RA
						AUR62005211-RA
						AUR62005211-RA
						AUR62008727-RA
						AUR62008727-RA
						AUR62008727-RA
						AUR62008727-RA
						AUR62008727-RA
						AUR62038339-RA
						AUR62038339-RA
						AUR62038339-RA
						AUR62038339-RA
						AUR62038339-RA
						AUR62014053-RA
						AUR62014053-RA
						AUR62014053-RA
						AUR62014053-RA
						AUR62014053-RA
						AUR62022858-RA
						AUR62022858-RA
						AUR62022858-RA
						AUR62022858-RA
						AUR62022858-RA
						AUR62009067-RA
						AUR62009067-RA
						AUR62009067-RA
						AUR62009067-RA
						AUR62009067-RA
						AUR62033738-RA
						AUR62033738-RA
						AUR62033738-RA
						AUR62033738-RA
						AUR62035536-RA
						AUR62035536-RA
						AUR62035536-RA
						AUR62035536-RA
						AUR62035536-RA
						AUR62039015-RA;AUR62038936-RA
						AUR62039015-RA;AUR62038936-RA
						AUR62039015-RA;AUR62038936-RA
						AUR62039015-RA;AUR62038936-RA
						AUR62039015-RA;AUR62038936-RA
						AUR62039015-RA;AUR62038936-RA
						AUR62027912-RA;AUR62027911-RA;AUR62024985-RA;AUR62024984-RA;AUR62020794-RA;AUR62020793-RA;AUR62014231-RA;AUR62004917-RA
						AUR62027912-RA;AUR62027911-RA;AUR62024985-RA;AUR62024984-RA;AUR62020794-RA;AUR62020793-RA;AUR62014231-RA;AUR62004917-RA
						AUR62027912-RA;AUR62027911-RA;AUR62024985-RA;AUR62024984-RA;AUR62020794-RA;AUR62020793-RA;AUR62014231-RA;AUR62004917-RA
						AUR62027912-RA;AUR62027911-RA;AUR62024985-RA;AUR62024984-RA;AUR62020794-RA;AUR62020793-RA;AUR62014231-RA;AUR62004917-RA
						AUR62027912-RA;AUR62027911-RA;AUR62024985-RA;AUR62024984-RA;AUR62020794-RA;AUR62020793-RA;AUR62014231-RA;AUR62004917-RA
						AUR62027912-RA;AUR62027911-RA;AUR62024985-RA;AUR62024984-RA;AUR62020794-RA;AUR62020793-RA;AUR62014231-RA;AUR62004917-RA
						AUR62027912-RA;AUR62027911-RA;AUR62024985-RA;AUR62024984-RA;AUR62020794-RA;AUR62020793-RA;AUR62014231-RA;AUR62004917-RA
						AUR62027912-RA;AUR62027911-RA;AUR62024985-RA;AUR62024984-RA;AUR62020794-RA;AUR62020793-RA;AUR62014231-RA;AUR62004917-RA
						AUR62042092-RA;AUR62034184-RA
						AUR62042092-RA;AUR62034184-RA
						AUR62042092-RA;AUR62034184-RA
						AUR62042092-RA;AUR62034184-RA
						AUR62042092-RA;AUR62034184-RA
						AUR62029720-RA
						AUR62029720-RA
						AUR62029720-RA
						AUR62029720-RA
						AUR62029720-RA
						AUR62043580-RA;AUR62036140-RA;AUR62036139-RA;AUR62036137-RA;AUR62026722-RA;AUR62026721-RA;AUR62019499-RA;AUR62019497-RA;AUR62019495-RA;AUR62019258-RA;AUR62013570-RA;AUR62000086-RA
						AUR62043580-RA;AUR62036140-RA;AUR62036139-RA;AUR62036137-RA;AUR62026722-RA;AUR62026721-RA;AUR62019499-RA;AUR62019497-RA;AUR62019495-RA;AUR62019258-RA;AUR62013570-RA;AUR62000086-RA
						AUR62043580-RA;AUR62036140-RA;AUR62036139-RA;AUR62036137-RA;AUR62026722-RA;AUR62026721-RA;AUR62019499-RA;AUR62019497-RA;AUR62019495-RA;AUR62019258-RA;AUR62013570-RA;AUR62000086-RA
						AUR62043580-RA;AUR62036140-RA;AUR62036139-RA;AUR62036137-RA;AUR62026722-RA;AUR62026721-RA;AUR62019499-RA;AUR62019497-RA;AUR62019495-RA;AUR62019258-RA;AUR62013570-RA;AUR62000086-RA
						AUR62043580-RA;AUR62036140-RA;AUR62036139-RA;AUR62036137-RA;AUR62026722-RA;AUR62026721-RA;AUR62019499-RA;AUR62019497-RA;AUR62019495-RA;AUR62019258-RA;AUR62013570-RA;AUR62000086-RA
						AUR62043580-RA;AUR62036140-RA;AUR62036139-RA;AUR62036137-RA;AUR62026722-RA;AUR62026721-RA;AUR62019499-RA;AUR62019497-RA;AUR62019495-RA;AUR62019258-RA;AUR62013570-RA;AUR62000086-RA
						AUR62043580-RA;AUR62036140-RA;AUR62036139-RA;AUR62036137-RA;AUR62026722-RA;AUR62026721-RA;AUR62019499-RA;AUR62019497-RA;AUR62019495-RA;AUR62019258-RA;AUR62013570-RA;AUR62000086-RA
						AUR62023689-RA;AUR62002497-RA
						AUR62023689-RA;AUR62002497-RA
						AUR62023689-RA;AUR62002497-RA
						AUR62023689-RA;AUR62002497-RA
						AUR62023689-RA;AUR62002497-RA
						AUR62032889-RA;AUR62017761-RA
						AUR62032889-RA;AUR62017761-RA
						AUR62032889-RA;AUR62017761-RA
						AUR62032889-RA;AUR62017761-RA
						AUR62032889-RA;AUR62017761-RA
						AUR62036002-RA
						AUR62036002-RA
						AUR62036002-RA
						AUR62036002-RA
						AUR62035560-RA
						AUR62035560-RA
						AUR62035560-RA
						AUR62035560-RA
						AUR62035560-RA
						AUR62033587-RA
						AUR62033587-RA
						AUR62033587-RA
						AUR62033587-RA
						AUR62033587-RA
						AUR62033769-RA
						AUR62033769-RA
						AUR62033769-RA
						AUR62033769-RA
						AUR62033769-RA
						AUR62011516-RA
						AUR62011516-RA
						AUR62011516-RA
						AUR62011516-RA
						AUR62011516-RA
						AUR62032567-RA;AUR62031684-RA
						AUR62032567-RA;AUR62031684-RA
						AUR62032567-RA;AUR62031684-RA
						AUR62032567-RA;AUR62031684-RA
						AUR62032567-RA;AUR62031684-RA
						AUR62005277-RA;AUR62000676-RA
						AUR62005277-RA;AUR62000676-RA
						AUR62005277-RA;AUR62000676-RA
						AUR62005277-RA;AUR62000676-RA
						AUR62005277-RA;AUR62000676-RA
						AUR62005277-RA;AUR62000676-RA
						AUR62029228-RA
						AUR62029228-RA
						AUR62029228-RA
						AUR62029228-RA
						AUR62033140-RA;AUR62008631-RA
						AUR62033140-RA;AUR62008631-RA
						AUR62033140-RA;AUR62008631-RA
						AUR62033140-RA;AUR62008631-RA
						AUR62033140-RA;AUR62008631-RA
						AUR62037172-RA
						AUR62037172-RA
						AUR62037172-RA
						AUR62037172-RA
						AUR62006993-RA;AUR62000638-RA
						AUR62006993-RA;AUR62000638-RA
						AUR62006993-RA;AUR62000638-RA
						AUR62006993-RA;AUR62000638-RA
						AUR62006993-RA;AUR62000638-RA
						AUR62021390-RA
						AUR62021390-RA
						AUR62021390-RA
						AUR62021390-RA
						AUR62024712-RA
						AUR62024712-RA
						AUR62024712-RA
						AUR62024712-RA
						AUR62024712-RA
						AUR62024712-RA
						AUR62024712-RA
						AUR62025726-RA
						AUR62025726-RA
						AUR62025726-RA
						AUR62025726-RA
						AUR62017532-RA;AUR62015075-RA
						AUR62017532-RA;AUR62015075-RA
						AUR62017532-RA;AUR62015075-RA
						AUR62017532-RA;AUR62015075-RA
						AUR62017532-RA;AUR62015075-RA
						AUR62030891-RA
						AUR62030891-RA
						AUR62030891-RA
						AUR62030891-RA
						AUR62030891-RA
						AUR62024589-RA;AUR62024586-RA;AUR62024583-RA
						AUR62024589-RA;AUR62024586-RA;AUR62024583-RA
						AUR62024589-RA;AUR62024586-RA;AUR62024583-RA
						AUR62024589-RA;AUR62024586-RA;AUR62024583-RA
						AUR62024589-RA;AUR62024586-RA;AUR62024583-RA
						AUR62003790-RA
						AUR62003790-RA
						AUR62003790-RA
						AUR62003790-RA
						AUR62003790-RA
						AUR62011924-RA
						AUR62011924-RA
						AUR62011924-RA
						AUR62011924-RA
						AUR62011924-RA
						AUR62029730-RA;AUR62006390-RA
						AUR62029730-RA;AUR62006390-RA
						AUR62029730-RA;AUR62006390-RA
						AUR62029730-RA;AUR62006390-RA
						AUR62029730-RA;AUR62006390-RA
						AUR62031812-RA
						AUR62031812-RA
						AUR62031812-RA
						AUR62031812-RA
						AUR62022990-RA
						AUR62022990-RA
						AUR62022990-RA
						AUR62022990-RA
						AUR62016740-RA;AUR62011317-RA
						AUR62016740-RA;AUR62011317-RA
						AUR62016740-RA;AUR62011317-RA
						AUR62016740-RA;AUR62011317-RA
						AUR62004958-RA
						AUR62004958-RA
						AUR62004958-RA
						AUR62004958-RA
						AUR62020865-RA;AUR62018554-RA
						AUR62020865-RA;AUR62018554-RA
						AUR62020865-RA;AUR62018554-RA
						AUR62020865-RA;AUR62018554-RA
						AUR62043105-RA
						AUR62043105-RA
						AUR62043105-RA
						AUR62043105-RA
						AUR62005794-RA
						AUR62005794-RA
						AUR62005794-RA
						AUR62005794-RA
						AUR62044268-RA;AUR62008683-RA
						AUR62044268-RA;AUR62008683-RA
						AUR62044268-RA;AUR62008683-RA
						AUR62044268-RA;AUR62008683-RA
						AUR62044268-RA;AUR62008683-RA
						AUR62044268-RA;AUR62008683-RA
						AUR62044268-RA;AUR62008683-RA
						AUR62043467-RA;AUR62021937-RA
						AUR62043467-RA;AUR62021937-RA
						AUR62043467-RA;AUR62021937-RA
						AUR62043467-RA;AUR62021937-RA
						AUR62029725-RA
						AUR62029725-RA
						AUR62029725-RA
						AUR62029725-RA
						AUR62030612-RA
						AUR62030612-RA
						AUR62030612-RA
						AUR62030612-RA
						AUR62036500-RA;AUR62009679-RA;AUR62006520-RA;AUR62001883-RA
						AUR62036500-RA;AUR62009679-RA;AUR62006520-RA;AUR62001883-RA
						AUR62036500-RA;AUR62009679-RA;AUR62006520-RA;AUR62001883-RA
						AUR62036500-RA;AUR62009679-RA;AUR62006520-RA;AUR62001883-RA
						AUR62009619-RA;AUR62001831-RA
						AUR62009619-RA;AUR62001831-RA
						AUR62009619-RA;AUR62001831-RA
						AUR62009619-RA;AUR62001831-RA
						AUR62009619-RA;AUR62001831-RA
						AUR62009619-RA;AUR62001831-RA
						AUR62029150-RA
						AUR62029150-RA
						AUR62029150-RA
						AUR62029150-RA
						AUR62015569-RA
						AUR62015569-RA
						AUR62015569-RA
						AUR62015569-RA
						AUR62027308-RA
						AUR62027308-RA
						AUR62027308-RA
						AUR62027308-RA
						AUR62042456-RA;AUR62034031-RA
						AUR62042456-RA;AUR62034031-RA
						AUR62042456-RA;AUR62034031-RA
						AUR62023081-RA
						AUR62023081-RA
						AUR62023081-RA
						AUR62032238-RA
						AUR62032238-RA
						AUR62032238-RA
						AUR62032238-RA
						AUR62019117-RA;AUR62014375-RA
						AUR62019117-RA;AUR62014375-RA
						AUR62019117-RA;AUR62014375-RA
						AUR62019117-RA;AUR62014375-RA
						AUR62019117-RA;AUR62014375-RA
						AUR62019117-RA;AUR62014375-RA
						AUR62040684-RA
						AUR62040684-RA
						AUR62040684-RA
						AUR62040684-RA
						AUR62032532-RA
						AUR62032532-RA
						AUR62032532-RA
						AUR62032532-RA
						AUR62042417-RA;AUR62040890-RA;AUR62026906-RA;AUR62026903-RA
						AUR62042417-RA;AUR62040890-RA;AUR62026906-RA;AUR62026903-RA
						AUR62042417-RA;AUR62040890-RA;AUR62026906-RA;AUR62026903-RA
						AUR62027179-RA
						AUR62027179-RA
						AUR62027179-RA
						AUR62027179-RA
						AUR62027179-RA
						AUR62031128-RA
						AUR62031128-RA
						AUR62031128-RA
						AUR62020080-RA
						AUR62020080-RA
						AUR62020080-RA
						AUR62020080-RA
						AUR62042305-RA;AUR62037601-RA
						AUR62042305-RA;AUR62037601-RA
						AUR62042305-RA;AUR62037601-RA
						AUR62042305-RA;AUR62037601-RA
						AUR62004047-RA
						AUR62004047-RA
						AUR62004047-RA
						AUR62004047-RA
						AUR62004047-RA
						AUR62030000-RA;AUR62006781-RA;AUR62002578-RA;AUR62000436-RA
						AUR62030000-RA;AUR62006781-RA;AUR62002578-RA;AUR62000436-RA
						AUR62030000-RA;AUR62006781-RA;AUR62002578-RA;AUR62000436-RA
						AUR62030000-RA;AUR62006781-RA;AUR62002578-RA;AUR62000436-RA
						AUR62030000-RA;AUR62006781-RA;AUR62002578-RA;AUR62000436-RA
						AUR62037008-RA;AUR62035594-RA;AUR62006210-RA;AUR62006032-RA
						AUR62037008-RA;AUR62035594-RA;AUR62006210-RA;AUR62006032-RA
						AUR62037008-RA;AUR62035594-RA;AUR62006210-RA;AUR62006032-RA
						AUR62037008-RA;AUR62035594-RA;AUR62006210-RA;AUR62006032-RA
						AUR62037008-RA;AUR62035594-RA;AUR62006210-RA;AUR62006032-RA
						AUR62004753-RA
						AUR62004753-RA
						AUR62004753-RA
						AUR62040244-RA;AUR62004002-RA
						AUR62040244-RA;AUR62004002-RA
						AUR62040244-RA;AUR62004002-RA
						AUR62040244-RA;AUR62004002-RA
						AUR62021710-RA;AUR62008389-RA
						AUR62021710-RA;AUR62008389-RA
						AUR62021710-RA;AUR62008389-RA
						AUR62038273-RA
						AUR62038273-RA
						AUR62038273-RA
						AUR62035062-RA
						AUR62035062-RA
						AUR62035062-RA
						AUR62035062-RA
						AUR62035062-RA
						AUR62026335-RA
						AUR62026335-RA
						AUR62026335-RA
						AUR62026335-RA
						AUR62023775-RA;AUR62002414-RA
						AUR62023775-RA;AUR62002414-RA
						AUR62023775-RA;AUR62002414-RA
						AUR62032517-RA;AUR62017449-RA
						AUR62032517-RA;AUR62017449-RA
						AUR62032517-RA;AUR62017449-RA
						AUR62031441-RA;AUR62021097-RA
						AUR62031441-RA;AUR62021097-RA
						AUR62031441-RA;AUR62021097-RA
						AUR62031441-RA;AUR62021097-RA
						AUR62038066-RA
						AUR62038066-RA
						AUR62038066-RA
						AUR62038066-RA
						AUR62038066-RA
						AUR62016444-RA
						AUR62016444-RA
						AUR62016444-RA
						AUR62013614-RA;AUR62004234-RA
						AUR62013614-RA;AUR62004234-RA
						AUR62013614-RA;AUR62004234-RA
						AUR62013614-RA;AUR62004234-RA
						AUR62002570-RA
						AUR62002570-RA
						AUR62002570-RA
						AUR62002570-RA
						AUR62002159-RA
						AUR62002159-RA
						AUR62002159-RA
						AUR62025604-RA
						AUR62025604-RA
						AUR62025604-RA
						AUR62021270-RA
						AUR62021270-RA
						AUR62021270-RA
						AUR62021210-RA;AUR62016002-RA
						AUR62021210-RA;AUR62016002-RA
						AUR62021210-RA;AUR62016002-RA
						AUR62021210-RA;AUR62016002-RA
[truncated: 718 more rows]
