# Supplementary material for: Preparation and analysis of quinoa active protein (QAP) and its mechanism of inhibiting Candida albicans from a transcriptome perspective
Source: PeerJ. 2025 Feb 14;13:e18961. doi: 10.7717/peerj.18961 (PMC11831975; doi:10.7717/peerj.18961)
Supplement: Supplemental Information 9 [file peerj-13-18961-s009.xlsx]

## Sheet: sheet1
IPR ID	Type	IPR Desc	Protein Count(104)	Proteins
IPR006045	domain	Cupin 1	12	AUR62002139-RA;AUR62003182-RA;AUR62009632-RA;AUR62011869-RA;AUR62015569-RA;AUR62015570-RA;AUR62024712-RA;AUR62024716-RA;AUR62025011-RA;AUR62028591-RA;AUR62032318-RA;AUR62034727-RA
IPR011051	homologous_superfamily	RmlC-like cupin domain superfamily	12	AUR62002139-RA;AUR62003182-RA;AUR62009632-RA;AUR62011869-RA;AUR62015569-RA;AUR62015570-RA;AUR62024712-RA;AUR62024716-RA;AUR62025011-RA;AUR62028591-RA;AUR62032318-RA;AUR62034727-RA
IPR014710	homologous_superfamily	RmlC-like jelly roll fold	12	AUR62002139-RA;AUR62003182-RA;AUR62009632-RA;AUR62011869-RA;AUR62015569-RA;AUR62015570-RA;AUR62024712-RA;AUR62024716-RA;AUR62025011-RA;AUR62028591-RA;AUR62032318-RA;AUR62034727-RA
IPR036291	homologous_superfamily	NAD(P)-binding domain superfamily	11	AUR62000839-RA;AUR62005133-RA;AUR62013484-RA;AUR62015572-RA;AUR62019540-RA;AUR62020865-RA;AUR62025870-RA;AUR62029572-RA;AUR62038844-RA;AUR62039005-RA;AUR62041751-RA
IPR017853	homologous_superfamily	Glycoside hydrolase superfamily	10	AUR62006360-RA;AUR62015174-RA;AUR62021097-RA;AUR62021100-RA;AUR62029196-RA;AUR62029688-RA;AUR62031439-RA;AUR62033546-RA;AUR62039595-RA;AUR62039857-RA
IPR013780	homologous_superfamily	Glycosyl hydrolase, all-beta	7	AUR62006360-RA;AUR62021097-RA;AUR62021100-RA;AUR62029688-RA;AUR62031439-RA;AUR62033546-RA;AUR62039595-RA
IPR006044	family	11-S seed storage protein, plant	7	AUR62002139-RA;AUR62009632-RA;AUR62011869-RA;AUR62015569-RA;AUR62015570-RA;AUR62024712-RA;AUR62024716-RA
IPR036249	homologous_superfamily	Thioredoxin-like superfamily	7	AUR62008609-RA;AUR62013896-RA;AUR62019063-RA;AUR62022530-RA;AUR62029991-RA;AUR62036698-RA;AUR62040536-RA
IPR017989	family	Ribosome-inactivating protein type 1/2	4	AUR62017741-RA;AUR62032926-RA;AUR62032929-RA;AUR62032931-RA
IPR020568	homologous_superfamily	Ribosomal protein S5 domain 2-type fold	4	AUR62026025-RA;AUR62031065-RA;AUR62035682-RA;AUR62040890-RA
IPR036041	homologous_superfamily	Ribosome-inactivating protein superfamily	4	AUR62017741-RA;AUR62032926-RA;AUR62032929-RA;AUR62032931-RA
IPR016139	homologous_superfamily	Ribosome-inactivating protein, subdomain 2	4	AUR62017741-RA;AUR62032926-RA;AUR62032929-RA;AUR62032931-RA
IPR002347	family	Short-chain dehydrogenase/reductase SDR	4	AUR62000839-RA;AUR62005133-RA;AUR62029572-RA;AUR62038844-RA
IPR020904	conserved_site	Short-chain dehydrogenase/reductase, conserved site	4	AUR62000839-RA;AUR62005133-RA;AUR62029572-RA;AUR62038844-RA
IPR009000	homologous_superfamily	Translation protein, beta-barrel domain superfamily	4	AUR62017949-RA;AUR62020618-RA;AUR62040890-RA;AUR62044656-RA
IPR016138	homologous_superfamily	Ribosome-inactivating protein, subdomain 1	4	AUR62017741-RA;AUR62032926-RA;AUR62032929-RA;AUR62032931-RA
IPR001574	family	Ribosome-inactivating protein	4	AUR62017741-RA;AUR62032926-RA;AUR62032929-RA;AUR62032931-RA
IPR036908	homologous_superfamily	RlpA-like domain superfamily	3	AUR62001001-RA;AUR62004958-RA;AUR62012951-RA
IPR013785	homologous_superfamily	Aldolase-type TIM barrel	3	AUR62039374-RA;AUR62039595-RA;AUR62041432-RA
IPR022379	conserved_site	11-S seed storage protein, conserved site	3	AUR62011869-RA;AUR62024712-RA;AUR62024716-RA
IPR004161	domain	Translation elongation factor EFTu-like, domain 2	3	AUR62020618-RA;AUR62040890-RA;AUR62044656-RA
IPR036282	homologous_superfamily	Glutathione S-transferase, C-terminal domain superfamily	3	AUR62008609-RA;AUR62022530-RA;AUR62040536-RA
IPR014721	homologous_superfamily	Ribosomal protein S5 domain 2-type fold, subgroup	3	AUR62026025-RA;AUR62031065-RA;AUR62040890-RA
IPR017988	conserved_site	Ribosome-inactivating protein conserved site	3	AUR62017741-RA;AUR62032929-RA;AUR62032931-RA
IPR000322	family	Glycoside hydrolase family 31	3	AUR62021097-RA;AUR62021100-RA;AUR62031439-RA
IPR027417	homologous_superfamily	P-loop containing nucleoside triphosphate hydrolase	3	AUR62020618-RA;AUR62040890-RA;AUR62044656-RA
IPR036312	homologous_superfamily	Bifunctional inhibitor/plant lipid transfer protein/seed storage helical domain superfamily	3	AUR62006386-RA;AUR62029720-RA;AUR62029726-RA
IPR014756	homologous_superfamily	Immunoglobulin E-set	3	AUR62006360-RA;AUR62029688-RA;AUR62033546-RA
IPR004045	domain	Glutathione S-transferase, N-terminal	3	AUR62008609-RA;AUR62022530-RA;AUR62040536-RA
IPR025887	domain	Glycoside hydrolase family 31, N-terminal domain	3	AUR62021097-RA;AUR62021100-RA;AUR62031439-RA
IPR001611	repeat	Leucine-rich repeat	3	AUR62024355-RA;AUR62038925-RA;AUR62039001-RA
IPR004193	domain	Glycoside hydrolase, family 13, N-terminal	3	AUR62006360-RA;AUR62029688-RA;AUR62033546-RA
IPR000795	domain	Translational (tr)-type GTP-binding domain	3	AUR62020618-RA;AUR62040890-RA;AUR62044656-RA
IPR016140	domain	Bifunctional inhibitor/plant lipid transfer protein/seed storage helical domain	3	AUR62006386-RA;AUR62029720-RA;AUR62029726-RA
IPR030458	active_site	Glycosyl hydrolases family 31, active site	3	AUR62021097-RA;AUR62021100-RA;AUR62031439-RA
IPR010987	domain	Glutathione S-transferase, C-terminal-like	3	AUR62008609-RA;AUR62022530-RA;AUR62040536-RA
IPR030459	conserved_site	Glycosyl hydrolases family 31, conserved site	3	AUR62021097-RA;AUR62021100-RA;AUR62031439-RA
IPR031157	conserved_site	Tr-type G domain, conserved site	3	AUR62020618-RA;AUR62040890-RA;AUR62044656-RA
IPR013783	homologous_superfamily	Immunoglobulin-like fold	3	AUR62006360-RA;AUR62029688-RA;AUR62033546-RA
IPR011013	homologous_superfamily	Galactose mutarotase-like domain superfamily	3	AUR62021097-RA;AUR62021100-RA;AUR62031439-RA
IPR032675	homologous_superfamily	Leucine-rich repeat domain superfamily	3	AUR62024355-RA;AUR62038925-RA;AUR62039001-RA
IPR000528	family	Plant lipid transfer protein/Par allergen	3	AUR62006386-RA;AUR62029720-RA;AUR62029726-RA
IPR004160	domain	Translation elongation factor EFTu/EF1A, C-terminal	2	AUR62020618-RA;AUR62044656-RA
IPR001554	family	Glycoside hydrolase, family 14	2	AUR62015174-RA;AUR62029196-RA
IPR001153	domain	Barwin domain	2	AUR62001001-RA;AUR62004958-RA
IPR008991	homologous_superfamily	Translation protein SH3-like domain superfamily	2	AUR62009367-RA;AUR62030870-RA
IPR015955	homologous_superfamily	Lactate dehydrogenase/glycoside hydrolase, family 4, C-terminal	2	AUR62015572-RA;AUR62019540-RA
IPR036812	homologous_superfamily	NADP-dependent oxidoreductase domain superfamily	2	AUR62006284-RA;AUR62026335-RA
IPR018226	conserved_site	Barwin, conserved site	2	AUR62001001-RA;AUR62004958-RA
IPR001371	family	Glycoside hydrolase, family 14B, plant	2	AUR62015174-RA;AUR62029196-RA
IPR011839	domain	Alpha-1,6-glucosidases, pullulanase-type	2	AUR62006360-RA;AUR62029688-RA
IPR002925	domain	Dienelactone hydrolase	2	AUR62012879-RA;AUR62027103-RA
IPR018238	conserved_site	Glycoside hydrolase, family 14, conserved site	2	AUR62015174-RA;AUR62029196-RA
IPR001236	domain	Lactate/malate dehydrogenase, N-terminal	2	AUR62015572-RA;AUR62019540-RA
IPR001557	family	L-lactate/malate dehydrogenase	2	AUR62015572-RA;AUR62019540-RA
IPR024561	domain	Alpha-1,6-glucosidases, pullulanase-type, C-terminal	2	AUR62006360-RA;AUR62029688-RA
IPR040079	family	Glutathione Transferase family	2	AUR62022530-RA;AUR62040536-RA
IPR010686	family	Oil body-associated protein-like	2	AUR62020909-RA;AUR62044500-RA
IPR001252	active_site	Malate dehydrogenase, active site	2	AUR62015572-RA;AUR62019540-RA
IPR009001	homologous_superfamily	Translation elongation factor EF1A/initiation factor IF2gamma, C-terminal	2	AUR62020618-RA;AUR62044656-RA
IPR029058	homologous_superfamily	Alpha/Beta hydrolase fold	2	AUR62012879-RA;AUR62027103-RA
IPR020471	family	Aldo/keto reductase	2	AUR62006284-RA;AUR62026335-RA
IPR031727	domain	Galactose mutarotase, N-terminal barrel	2	AUR62021097-RA;AUR62021100-RA
IPR013766	domain	Thioredoxin domain	2	AUR62019063-RA;AUR62029991-RA
IPR005225	domain	Small GTP-binding protein domain	2	AUR62020618-RA;AUR62040890-RA
IPR040671	domain	Pullulanase, N2 domain	2	AUR62006360-RA;AUR62029688-RA
IPR014722	homologous_superfamily	Ribosomal protein L2, domain 2	2	AUR62009367-RA;AUR62030870-RA
IPR029068	homologous_superfamily	Glyoxalase/Bleomycin resistance protein/Dihydroxybiphenyl dioxygenase	2	AUR62001816-RA;AUR62043467-RA
IPR037523	domain	Vicinal oxygen chelate (VOC) domain	2	AUR62001816-RA;AUR62043467-RA
IPR013210	domain	Leucine-rich repeat-containing N-terminal, plant-type	2	AUR62038925-RA;AUR62039001-RA
IPR004360	domain	Glyoxalase/fosfomycin resistance/dioxygenase domain	2	AUR62001816-RA;AUR62043467-RA
IPR023210	domain	NADP-dependent oxidoreductase domain	2	AUR62006284-RA;AUR62026335-RA
IPR012336	domain	Thioredoxin-like fold	2	AUR62013896-RA;AUR62036698-RA
IPR036188	homologous_superfamily	FAD/NAD(P)-binding domain superfamily	2	AUR62020539-RA;AUR62030978-RA
IPR018170	conserved_site	Aldo/keto reductase, conserved site	2	AUR62006284-RA;AUR62026335-RA
IPR022383	domain	Lactate/malate dehydrogenase, C-terminal	2	AUR62015572-RA;AUR62019540-RA
IPR000726	domain	Glycoside hydrolase, family 19, catalytic	1	AUR62031316-RA
IPR037196	homologous_superfamily	HSP90, C-terminal domain	1	AUR62035682-RA
IPR005711	family	Ribosomal protein S5, eukaryotic/archaeal	1	AUR62026025-RA
IPR000597	family	Ribosomal protein L3	1	AUR62017949-RA
IPR033937	domain	Carbamoyl-phosphate synthase large chain, methylglyoxal synthase-like domain	1	AUR62004284-RA
IPR009072	homologous_superfamily	Histone-fold	1	AUR62009617-RA
IPR005795	family	Major pollen allergen Lol pI	1	AUR62012951-RA
IPR016206	family	Ketol-acid reductoisomerase, plant	1	AUR62039005-RA
IPR042172	homologous_superfamily	Adenosylhomocysteinase-like superfamily	1	AUR62020865-RA
IPR016267	family	UTP--glucose-1-phosphate uridylyltransferase	1	AUR62003403-RA
IPR020828	domain	Glyceraldehyde 3-phosphate dehydrogenase, NAD(P) binding domain	1	AUR62025870-RA
IPR005324	domain	Ribosomal protein S5, C-terminal	1	AUR62026025-RA
IPR037439	family	1,4-alpha-glucan-branching enzyme	1	AUR62033546-RA
IPR018255	conserved_site	Ribosomal protein L10e, conserved site	1	AUR62026355-RA
IPR000136	family	Oleosin	1	AUR62022853-RA
IPR004001	conserved_site	Actin, conserved site	1	AUR62024157-RA
IPR020606	conserved_site	Ribosomal protein S7, conserved site	1	AUR62033617-RA
IPR029044	homologous_superfamily	Nucleotide-diphospho-sugar transferases	1	AUR62003403-RA
IPR004541	family	Translation elongation factor EFTu/EF1A, bacterial/organelle	1	AUR62020618-RA
IPR001380	family	Ribosomal protein L13e	1	AUR62027317-RA
IPR020830	active_site	Glyceraldehyde 3-phosphate dehydrogenase, active site	1	AUR62025870-RA
IPR020472	repeat	G-protein beta WD-40 repeat	1	AUR62033738-RA
IPR002068	domain	Alpha crystallin/Hsp20 domain	1	AUR62020570-RA
IPR016040	domain	NAD(P)-binding domain	1	AUR62041751-RA
IPR006148	domain	Glucosamine/galactosamine-6-phosphate isomerase	1	AUR62006034-RA
IPR000754	family	Ribosomal protein S9	1	AUR62031065-RA
IPR002171	family	Ribosomal protein L2	1	AUR62030870-RA
IPR000506	domain	Ketol-acid reductoisomerase, C-terminal	1	AUR62039005-RA
IPR002618	family	UDPGP family	1	AUR62003403-RA
IPR020829	domain	Glyceraldehyde 3-phosphate dehydrogenase, catalytic domain	1	AUR62025870-RA
IPR014726	homologous_superfamily	Ribosomal protein L2, domain 3	1	AUR62030870-RA
IPR004102	domain	Poly(ADP-ribose) polymerase, regulatory domain	1	AUR62009776-RA
IPR025558	domain	Domain of unknown function DUF4283	1	AUR62025870-RA
IPR016082	domain	Ribosomal protein L30, ferredoxin-like fold domain	1	AUR62020601-RA
IPR002130	domain	Cyclophilin-type peptidyl-prolyl cis-trans isomerase domain	1	AUR62010089-RA
IPR011990	homologous_superfamily	Tetratricopeptide-like helical domain superfamily	1	AUR62012951-RA
IPR001576	family	Phosphoglycerate kinase	1	AUR62040749-RA
IPR005483	domain	Carbamoyl-phosphate synthase large subunit, CPSase domain	1	AUR62004284-RA
IPR000915	family	60S ribosomal protein L6E	1	AUR62009367-RA
IPR019479	domain	Peroxiredoxin, C-terminal	1	AUR62029991-RA
IPR005900	domain	6-phosphogluconolactonase, DevB-type	1	AUR62006034-RA
IPR036823	homologous_superfamily	Ribosomal protein S7 domain superfamily	1	AUR62033617-RA
IPR038650	homologous_superfamily	PADR1 domain superfamily	1	AUR62009776-RA
IPR008138	domain	Saposin B type, region 2	1	AUR62042305-RA
IPR020811	domain	Enolase, N-terminal	1	AUR62033587-RA
IPR020902	conserved_site	Actin/actin-like conserved site	1	AUR62024157-RA
IPR041095	domain	Elongation Factor G, domain II	1	AUR62040890-RA
IPR025755	domain	60S ribosomal protein L4, C-terminal domain	1	AUR62042922-RA
IPR033720	domain	Elongation factor Tu, domain 2	1	AUR62020618-RA
IPR036914	homologous_superfamily	Methylglyoxal synthase-like domain superfamily	1	AUR62004284-RA
IPR002328	conserved_site	Alcohol dehydrogenase, zinc-type, conserved site	1	AUR62013484-RA
IPR000043	family	Adenosylhomocysteinase-like	1	AUR62020865-RA
IPR035990	homologous_superfamily	Triosephosphate isomerase superfamily	1	AUR62039374-RA
IPR010097	family	Malate dehydrogenase, type 1	1	AUR62019540-RA
IPR022896	family	Triosephosphate isomerase, bacterial/eukaryotic	1	AUR62039374-RA
IPR036849	homologous_superfamily	Enolase-like, C-terminal domain superfamily	1	AUR62033587-RA
IPR005247	family	YbhB/YbcL	1	AUR62030790-RA
IPR019926	conserved_site	Ribosomal protein L3, conserved site	1	AUR62017949-RA
IPR029000	homologous_superfamily	Cyclophilin-like domain superfamily	1	AUR62010089-RA
IPR027534	family	Ribosomal protein L12/P1/P2 family	1	AUR62009794-RA
IPR013149	domain	Alcohol dehydrogenase, C-terminal	1	AUR62013484-RA
IPR038071	homologous_superfamily	UROD/MetE-like superfamily	1	AUR62039712-RA
IPR035808	domain	Ribosomal protein L7, eukaryotic/archaeal	1	AUR62020601-RA
IPR029063	homologous_superfamily	S-adenosyl-L-methionine-dependent methyltransferase	1	AUR62022089-RA
IPR012317	domain	Poly(ADP-ribose) polymerase, catalytic domain	1	AUR62009776-RA
IPR001613	family	Flavin amine oxidase	1	AUR62030978-RA
IPR009009	domain	RlpA-like protein, double-psi beta-barrel domain	1	AUR62012951-RA
IPR000490	family	Glycoside hydrolase family 17	1	AUR62039857-RA
IPR016283	family	Glycoside hydrolase, family 19	1	AUR62031316-RA
IPR012340	homologous_superfamily	Nucleic acid-binding, OB-fold	1	AUR62030870-RA
IPR006276	family	Cobalamin-independent methionine synthase	1	AUR62039712-RA
IPR000866	domain	Alkyl hydroperoxide reductase subunit C/ Thiol specific antioxidant	1	AUR62029991-RA
IPR013023	family	Ketol-acid reductoisomerase	1	AUR62039005-RA
IPR012988	domain	Ribosomal protein L30, N-terminal	1	AUR62020601-RA
IPR036242	homologous_superfamily	Agglutinin domain superfamily	1	AUR62036893-RA
IPR036420	homologous_superfamily	BRCT domain superfamily	1	AUR62009776-RA
IPR029017	homologous_superfamily	Enolase-like, N-terminal	1	AUR62033587-RA
IPR001404	family	Heat shock protein Hsp90 family	1	AUR62035682-RA
IPR007856	domain	Saposin-like type B, region 1	1	AUR62042305-RA
IPR008978	homologous_superfamily	HSP20-like chaperone	1	AUR62020570-RA
IPR013328	homologous_superfamily	6-phosphogluconate dehydrogenase, domain 2	1	AUR62039005-RA
IPR017986	domain	WD40-repeat-containing domain	1	AUR62033738-RA
IPR006048	domain	Alpha-amylase/branching enzyme, C-terminal all beta	1	AUR62033546-RA
IPR013215	domain	Cobalamin-independent methionine synthase MetE, N-terminal	1	AUR62039712-RA
IPR008998	domain	Agglutinin domain	1	AUR62036893-RA
IPR003591	repeat	Leucine-rich repeat, typical subtype	1	AUR62039001-RA
IPR037171	homologous_superfamily	NagB/RpiA transferase-like	1	AUR62006034-RA
IPR000941	family	Enolase	1	AUR62033587-RA
IPR036897	homologous_superfamily	Carbamoyl-phosphate synthetase, large subunit oligomerisation domain superfamily	1	AUR62004284-RA
IPR024706	family	Peroxiredoxin, AhpC-type	1	AUR62029991-RA
IPR008139	domain	Saposin B type domain	1	AUR62042305-RA
IPR036890	homologous_superfamily	Histidine kinase/HSP90-like ATPase superfamily	1	AUR62035682-RA
IPR013534	domain	Starch synthase, catalytic domain	1	AUR62035617-RA
IPR020831	family	Glyceraldehyde/Erythrose phosphate dehydrogenase family	1	AUR62025870-RA
IPR019805	conserved_site	Heat shock protein Hsp90, conserved site	1	AUR62035682-RA
IPR041233	domain	Alpha galactosidase, C-terminal beta sandwich domain	1	AUR62039595-RA
IPR013810	domain	Ribosomal protein S5, N-terminal	1	AUR62026025-RA
IPR031107	family	Small heat shock protein HSP20	1	AUR62020570-RA
IPR000235	family	Ribosomal protein S5/S7	1	AUR62033617-RA
IPR008914	family	Phosphatidylethanolamine-binding protein	1	AUR62030790-RA
IPR041709	domain	Elongation factor Tu (EF-Tu), GTP-binding domain	1	AUR62020618-RA
IPR007112	domain	Expansin/pollen allergen, DPBB domain	1	AUR62012951-RA
IPR024936	family	Cyclophilin-type peptidyl-prolyl cis-trans isomerase	1	AUR62010089-RA
IPR022671	conserved_site	Ribosomal protein L2, conserved site	1	AUR62030870-RA
IPR005479	domain	Carbamoyl-phosphate synthetase large subunit-like, ATP-binding domain	1	AUR62004284-RA
IPR033121	domain	Peptidase family A1 domain	1	AUR62042305-RA
IPR001938	family	Thaumatin family	1	AUR62001811-RA
IPR022666	domain	Ribosomal Proteins L2, RNA binding domain	1	AUR62030870-RA
IPR039104	family	6-Phosphogluconolactonase	1	AUR62006034-RA
IPR020861	active_site	Triosephosphate isomerase, active site	1	AUR62039374-RA
IPR020810	domain	Enolase, C-terminal TIM barrel domain	1	AUR62033587-RA
IPR013154	domain	Alcohol dehydrogenase, N-terminal	1	AUR62013484-RA
IPR020809	conserved_site	Enolase, conserved site	1	AUR62033587-RA
IPR010945	family	Malate dehydrogenase, type 2	1	AUR62015572-RA
IPR001357	domain	BRCT domain	1	AUR62009776-RA
IPR011835	family	Bacterial/plant glycogen synthase	1	AUR62035617-RA
IPR020892	conserved_site	Cyclophilin-type peptidyl-prolyl cis-trans isomerase, conserved site	1	AUR62010089-RA
IPR011274	family	Malate dehydrogenase, NAD-dependent, cytosolic	1	AUR62015572-RA
IPR000652	family	Triosephosphate isomerase	1	AUR62039374-RA
IPR036322	homologous_superfamily	WD40-repeat-containing domain superfamily	1	AUR62033738-RA
IPR005998	family	Ribosomal protein L7, eukaryotic	1	AUR62020601-RA
IPR039699	family	Ribosomal protein L7/L30	1	AUR62020601-RA
IPR001680	repeat	WD40 repeat	1	AUR62033738-RA
IPR007736	family	Caleosin-related	1	AUR62035093-RA
IPR036920	homologous_superfamily	Ribosomal protein L10e/L16 superfamily	1	AUR62026355-RA
IPR036919	homologous_superfamily	Ribosomal protein L30, ferredoxin-like fold domain superfamily	1	AUR62020601-RA
IPR001229	domain	Jacalin-like lectin domain	1	AUR62041158-RA
IPR036404	homologous_superfamily	Jacalin-like lectin domain superfamily	1	AUR62041158-RA
IPR018192	conserved_site	Ribosomal protein S5, N-terminal, conserved site	1	AUR62026025-RA
IPR015824	homologous_superfamily	Phosphoglycerate kinase, N-terminal	1	AUR62040749-RA
IPR020575	domain	Heat shock protein Hsp90, N-terminal	1	AUR62035682-RA
IPR011001	homologous_superfamily	Saposin-like	1	AUR62042305-RA
IPR017937	conserved_site	Thioredoxin, conserved site	1	AUR62019063-RA
IPR001969	active_site	Aspartic peptidase, active site	1	AUR62042305-RA
IPR015943	homologous_superfamily	WD40/YVTN repeat-like-containing domain superfamily	1	AUR62033738-RA
IPR001461	family	Aspartic peptidase A1 family	1	AUR62042305-RA
IPR038716	homologous_superfamily	Ribosomal protein P1/P2, N-terminal domain	1	AUR62009794-RA
IPR002937	domain	Amine oxidase	1	AUR62030978-RA
IPR023574	homologous_superfamily	Ribosomal protein L4 domain superfamily	1	AUR62042922-RA
IPR002885	repeat	Pentatricopeptide repeat	1	AUR62012951-RA
IPR041997	domain	Ribosomal Protein L6, KOW domain	1	AUR62009367-RA
IPR036616	homologous_superfamily	Poly(ADP-ribose) polymerase, regulatory domain superfamily	1	AUR62009776-RA
IPR018256	conserved_site	Ribosomal protein L13e, conserved site	1	AUR62027317-RA
IPR020082	conserved_site	S-adenosyl-L-homocysteine hydrolase, conserved site	1	AUR62020865-RA
IPR022669	domain	Ribosomal protein L2, C-terminal	1	AUR62030870-RA
IPR037176	homologous_superfamily	Osmotin/thaumatin-like superfamily	1	AUR62001811-RA
IPR043129	homologous_superfamily	ATPase, nucleotide binding domain	1	AUR62024157-RA
IPR035647	homologous_superfamily	EF-G domain III/V-like	1	AUR62040890-RA
IPR033869	domain	Phytepsin	1	AUR62042305-RA
IPR027495	family	Thiamine thiazole synthase	1	AUR62020539-RA
IPR000558	family	Histone H2B	1	AUR62009617-RA
IPR003594	domain	Histidine kinase/HSP90-like ATPase	1	AUR62035682-RA
IPR006275	family	Carbamoyl-phosphate synthase, large subunit	1	AUR62004284-RA
IPR015911	conserved_site	Phosphoglycerate kinase, conserved site	1	AUR62040749-RA
IPR000640	domain	Elongation factor EFG, domain V-like	1	AUR62040890-RA
IPR000741	family	Fructose-bisphosphate aldolase, class-I	1	AUR62041432-RA
IPR015878	domain	S-adenosyl-L-homocysteine hydrolase, NAD binding domain	1	AUR62020865-RA
IPR002629	domain	Cobalamin-independent methionine synthase MetE, C-terminal/archaeal	1	AUR62039712-RA
IPR016185	homologous_superfamily	Pre-ATP-grasp domain superfamily	1	AUR62004284-RA
IPR023798	domain	Ribosomal protein S7 domain	1	AUR62033617-RA
IPR006424	family	Glyceraldehyde-3-phosphate dehydrogenase, type I	1	AUR62025870-RA
IPR004046	domain	Glutathione S-transferase, C-terminal	1	AUR62008609-RA
IPR005517	domain	Translation elongation factor EFG/EF2, domain IV	1	AUR62040890-RA
IPR007125	domain	Histone H2A/H2B/H3	1	AUR62009617-RA
IPR002922	family	Thiazole biosynthetic enzyme Thi4 family	1	AUR62020539-RA
IPR036749	homologous_superfamily	Expansin, cellulose-binding-like domain superfamily	1	AUR62012951-RA
IPR021109	homologous_superfamily	Aspartic peptidase domain superfamily	1	AUR62042305-RA
IPR036610	homologous_superfamily	PEBP-like superfamily	1	AUR62030790-RA
IPR016180	domain	Ribosomal protein L10e/L16	1	AUR62026355-RA
IPR011032	homologous_superfamily	GroES-like superfamily	1	AUR62013484-RA
IPR001197	family	Ribosomal protein L10e	1	AUR62026355-RA
IPR000111	conserved_site	Glycoside hydrolase family 27/36, conserved site	1	AUR62039595-RA
IPR007118	family	Expansin/Lol pI	1	AUR62012951-RA
IPR005792	family	Protein disulphide isomerase	1	AUR62019063-RA
IPR023106	homologous_superfamily	Ribosomal protein L30, central domain, archaeal type	1	AUR62020601-RA
IPR020574	conserved_site	Ribosomal protein S9, conserved site	1	AUR62031065-RA
IPR005568	domain	Ribosomal protein L6, N-terminal	1	AUR62009367-RA
IPR044076	family	Ribosomal protein P2	1	AUR62009794-RA
IPR018146	conserved_site	Glyoxalase I, conserved site	1	AUR62043467-RA
IPR023346	homologous_superfamily	Lysozyme-like domain superfamily	1	AUR62031316-RA
IPR035669	domain	GDSL lipase/esterase-like, plant	1	AUR62038553-RA
IPR001296	domain	Glycosyl transferase, family 1	1	AUR62035617-RA
IPR018038	conserved_site	Ribosomal protein L30, conserved site	1	AUR62020601-RA
IPR002136	family	Ribosomal protein L4/L1e	1	AUR62042922-RA
IPR004361	family	Glyoxalase I	1	AUR62043467-RA
IPR008927	homologous_superfamily	6-phosphogluconate dehydrogenase-like, C-terminal domain superfamily	1	AUR62039005-RA
IPR011607	domain	Methylglyoxal synthase-like domain	1	AUR62004284-RA
IPR036930	homologous_superfamily	WGR domain superfamily	1	AUR62009776-RA
IPR005485	family	Ribosomal protein L5 eukaryotic/L18 archaeal	1	AUR62021346-RA
IPR029768	conserved_site	Fructose-bisphosphate aldolase class-I active site	1	AUR62041432-RA
IPR002241	family	Glycoside hydrolase, family 27	1	AUR62039595-RA
IPR012982	domain	PADR1 domain	1	AUR62009776-RA
IPR000851	family	Ribosomal protein S5	1	AUR62026025-RA
IPR006047	domain	Glycosyl hydrolase, family 13, catalytic domain	1	AUR62033546-RA
IPR011761	domain	ATP-grasp fold	1	AUR62004284-RA
IPR004539	family	Translation elongation factor EF1A, eukaryotic/archaeal	1	AUR62044656-RA
IPR005480	domain	Carbamoyl-phosphate synthetase, large subunit oligomerisation domain	1	AUR62004284-RA
IPR013116	domain	Ketol-acid reductoisomerase, N-terminal	1	AUR62039005-RA
IPR007117	domain	Expansin, cellulose-binding-like domain	1	AUR62012951-RA
IPR036043	homologous_superfamily	Phosphoglycerate kinase superfamily	1	AUR62040749-RA
IPR000682	family	Protein-L-isoaspartate(D-aspartate) O-methyltransferase	1	AUR62022089-RA
IPR001087	domain	GDSL lipase/esterase	1	AUR62038553-RA
IPR025607	domain	Ribosomal protein L5 eukaryotic/L18 archaeal, C-terminal	1	AUR62021346-RA
IPR008893	domain	WGR domain	1	AUR62009776-RA
IPR034347	domain	Glutathione S-transferases Phi, C-terminal	1	AUR62008609-RA
IPR005788	domain	Disulphide isomerase	1	AUR62019063-RA
IPR013000	conserved_site	Ribosomal protein L4/L1e, eukaryotic/archaeal, conserved site	1	AUR62042922-RA
IPR019775	conserved_site	WD40 repeat, conserved site	1	AUR62033738-RA
IPR004000	family	Actin family	1	AUR62024157-RA
IPR005716	family	Ribosomal protein S5/S7, eukaryotic/archaeal	1	AUR62033617-RA
IPR036514	homologous_superfamily	SGNH hydrolase superfamily	1	AUR62038553-RA
