# Supplementary material for: Preparation and analysis of quinoa active protein (QAP) and its mechanism of inhibiting Candida albicans from a transcriptome perspective
Source: PeerJ. 2025 Feb 14;13:e18961. doi: 10.7717/peerj.18961 (PMC11831975; doi:10.7717/peerj.18961)
Supplement: Supplemental Information 10 [file peerj-13-18961-s010.xlsx]

## Sheet: sheet1
IPR ID	Type	IPR Desc	Protein Count(26)	Proteins
IPR006044	family	11-S seed storage protein, plant	4	AUR62011869-RA;AUR62015570-RA;AUR62024712-RA;AUR62024716-RA
IPR014710	homologous_superfamily	RmlC-like jelly roll fold	4	AUR62011869-RA;AUR62015570-RA;AUR62024712-RA;AUR62024716-RA
IPR016140	domain	Bifunctional inhibitor/plant lipid transfer protein/seed storage helical domain	4	AUR62006386-RA;AUR62028706-RA;AUR62029720-RA;AUR62029725-RA
IPR006045	domain	Cupin 1	4	AUR62011869-RA;AUR62015570-RA;AUR62024712-RA;AUR62024716-RA
IPR011051	homologous_superfamily	RmlC-like cupin domain superfamily	4	AUR62011869-RA;AUR62015570-RA;AUR62024712-RA;AUR62024716-RA
IPR036312	homologous_superfamily	Bifunctional inhibitor/plant lipid transfer protein/seed storage helical domain superfamily	4	AUR62006386-RA;AUR62028706-RA;AUR62029720-RA;AUR62029725-RA
IPR022379	conserved_site	11-S seed storage protein, conserved site	3	AUR62011869-RA;AUR62024712-RA;AUR62024716-RA
IPR036908	homologous_superfamily	RlpA-like domain superfamily	3	AUR62001001-RA;AUR62004958-RA;AUR62012951-RA
IPR000528	family	Plant lipid transfer protein/Par allergen	3	AUR62006386-RA;AUR62029720-RA;AUR62029725-RA
IPR009000	homologous_superfamily	Translation protein, beta-barrel domain superfamily	2	AUR62028718-RA;AUR62038764-RA
IPR041709	domain	Elongation factor Tu (EF-Tu), GTP-binding domain	2	AUR62028718-RA;AUR62038764-RA
IPR009001	homologous_superfamily	Translation elongation factor EF1A/initiation factor IF2gamma, C-terminal	2	AUR62028718-RA;AUR62038764-RA
IPR016138	homologous_superfamily	Ribosome-inactivating protein, subdomain 1	2	AUR62017741-RA;AUR62032926-RA
IPR004541	family	Translation elongation factor EFTu/EF1A, bacterial/organelle	2	AUR62028718-RA;AUR62038764-RA
IPR018226	conserved_site	Barwin, conserved site	2	AUR62001001-RA;AUR62004958-RA
IPR017989	family	Ribosome-inactivating protein type 1/2	2	AUR62017741-RA;AUR62032926-RA
IPR036041	homologous_superfamily	Ribosome-inactivating protein superfamily	2	AUR62017741-RA;AUR62032926-RA
IPR033720	domain	Elongation factor Tu, domain 2	2	AUR62028718-RA;AUR62038764-RA
IPR016139	homologous_superfamily	Ribosome-inactivating protein, subdomain 2	2	AUR62017741-RA;AUR62032926-RA
IPR004161	domain	Translation elongation factor EFTu-like, domain 2	2	AUR62028718-RA;AUR62038764-RA
IPR001574	family	Ribosome-inactivating protein	2	AUR62017741-RA;AUR62032926-RA
IPR031157	conserved_site	Tr-type G domain, conserved site	2	AUR62028718-RA;AUR62038764-RA
IPR001153	domain	Barwin domain	2	AUR62001001-RA;AUR62004958-RA
IPR000795	domain	Translational (tr)-type GTP-binding domain	2	AUR62028718-RA;AUR62038764-RA
IPR004160	domain	Translation elongation factor EFTu/EF1A, C-terminal	2	AUR62028718-RA;AUR62038764-RA
IPR027417	homologous_superfamily	P-loop containing nucleoside triphosphate hydrolase	2	AUR62028718-RA;AUR62038764-RA
IPR001938	family	Thaumatin family	1	AUR62001811-RA
IPR029068	homologous_superfamily	Glyoxalase/Bleomycin resistance protein/Dihydroxybiphenyl dioxygenase	1	AUR62043467-RA
IPR013534	domain	Starch synthase, catalytic domain	1	AUR62035617-RA
IPR005479	domain	Carbamoyl-phosphate synthetase large subunit-like, ATP-binding domain	1	AUR62004284-RA
IPR013210	domain	Leucine-rich repeat-containing N-terminal, plant-type	1	AUR62039001-RA
IPR017853	homologous_superfamily	Glycoside hydrolase superfamily	1	AUR62031439-RA
IPR020902	conserved_site	Actin/actin-like conserved site	1	AUR62039382-RA
IPR020831	family	Glyceraldehyde/Erythrose phosphate dehydrogenase family	1	AUR62041490-RA
IPR011607	domain	Methylglyoxal synthase-like domain	1	AUR62004284-RA
IPR032675	homologous_superfamily	Leucine-rich repeat domain superfamily	1	AUR62039001-RA
IPR005480	domain	Carbamoyl-phosphate synthetase, large subunit oligomerisation domain	1	AUR62004284-RA
IPR042044	homologous_superfamily	Exocyst complex component EXOC6/Sec15, C-terminal, domain 2	1	AUR62025560-RA
IPR016283	family	Glycoside hydrolase, family 19	1	AUR62031316-RA
IPR020830	active_site	Glyceraldehyde 3-phosphate dehydrogenase, active site	1	AUR62041490-RA
IPR007225	family	Exocyst complex component EXOC6/Sec15	1	AUR62025560-RA
IPR007493	family	Protein of unknown function DUF538	1	AUR62025560-RA
IPR011013	homologous_superfamily	Galactose mutarotase-like domain superfamily	1	AUR62031439-RA
IPR036914	homologous_superfamily	Methylglyoxal synthase-like domain superfamily	1	AUR62004284-RA
IPR011835	family	Bacterial/plant glycogen synthase	1	AUR62035617-RA
IPR000322	family	Glycoside hydrolase family 31	1	AUR62031439-RA
IPR004001	conserved_site	Actin, conserved site	1	AUR62039382-RA
IPR036758	homologous_superfamily	At5g01610-like superfamily	1	AUR62025560-RA
IPR004361	family	Glyoxalase I	1	AUR62043467-RA
IPR007117	domain	Expansin, cellulose-binding-like domain	1	AUR62012951-RA
IPR011990	homologous_superfamily	Tetratricopeptide-like helical domain superfamily	1	AUR62012951-RA
IPR017988	conserved_site	Ribosome-inactivating protein conserved site	1	AUR62017741-RA
IPR004000	family	Actin family	1	AUR62039382-RA
IPR011761	domain	ATP-grasp fold	1	AUR62004284-RA
IPR025887	domain	Glycoside hydrolase family 31, N-terminal domain	1	AUR62031439-RA
IPR021131	domain	Ribosomal protein L18e/L15P	1	AUR62035212-RA
IPR006275	family	Carbamoyl-phosphate synthase, large subunit	1	AUR62004284-RA
IPR002885	repeat	Pentatricopeptide repeat	1	AUR62012951-RA
IPR016185	homologous_superfamily	Pre-ATP-grasp domain superfamily	1	AUR62004284-RA
IPR004360	domain	Glyoxalase/fosfomycin resistance/dioxygenase domain	1	AUR62043467-RA
IPR005795	family	Major pollen allergen Lol pI	1	AUR62012951-RA
IPR009009	domain	RlpA-like protein, double-psi beta-barrel domain	1	AUR62012951-RA
IPR023346	homologous_superfamily	Lysozyme-like domain superfamily	1	AUR62031316-RA
IPR001296	domain	Glycosyl transferase, family 1	1	AUR62035617-RA
IPR037523	domain	Vicinal oxygen chelate (VOC) domain	1	AUR62043467-RA
IPR033937	domain	Carbamoyl-phosphate synthase large chain, methylglyoxal synthase-like domain	1	AUR62004284-RA
IPR001196	conserved_site	Ribosomal protein L15, conserved site	1	AUR62035212-RA
IPR006424	family	Glyceraldehyde-3-phosphate dehydrogenase, type I	1	AUR62041490-RA
IPR005483	domain	Carbamoyl-phosphate synthase large subunit, CPSase domain	1	AUR62004284-RA
IPR036749	homologous_superfamily	Expansin, cellulose-binding-like domain superfamily	1	AUR62012951-RA
IPR020828	domain	Glyceraldehyde 3-phosphate dehydrogenase, NAD(P) binding domain	1	AUR62041490-RA
IPR042045	homologous_superfamily	Exocyst complex component EXOC6/Sec15, C-terminal, domain 1	1	AUR62025560-RA
IPR036227	homologous_superfamily	Ribosomal L18e/L15P superfamily	1	AUR62035212-RA
IPR005225	domain	Small GTP-binding protein domain	1	AUR62038764-RA
IPR039265	family	Putative lipid-transfer protein DIR1-like	1	AUR62028706-RA
IPR043129	homologous_superfamily	ATPase, nucleotide binding domain	1	AUR62039382-RA
IPR030458	active_site	Glycosyl hydrolases family 31, active site	1	AUR62031439-RA
IPR007118	family	Expansin/Lol pI	1	AUR62012951-RA
IPR013780	homologous_superfamily	Glycosyl hydrolase, all-beta	1	AUR62031439-RA
IPR018146	conserved_site	Glyoxalase I, conserved site	1	AUR62043467-RA
IPR030878	family	Ribosomal protein L15	1	AUR62035212-RA
IPR000726	domain	Glycoside hydrolase, family 19, catalytic	1	AUR62031316-RA
IPR030459	conserved_site	Glycosyl hydrolases family 31, conserved site	1	AUR62031439-RA
IPR020829	domain	Glyceraldehyde 3-phosphate dehydrogenase, catalytic domain	1	AUR62041490-RA
IPR036897	homologous_superfamily	Carbamoyl-phosphate synthetase, large subunit oligomerisation domain superfamily	1	AUR62004284-RA
IPR003591	repeat	Leucine-rich repeat, typical subtype	1	AUR62039001-RA
IPR037176	homologous_superfamily	Osmotin/thaumatin-like superfamily	1	AUR62001811-RA
IPR001611	repeat	Leucine-rich repeat	1	AUR62039001-RA
IPR036291	homologous_superfamily	NAD(P)-binding domain superfamily	1	AUR62041490-RA
IPR007112	domain	Expansin/pollen allergen, DPBB domain	1	AUR62012951-RA
IPR005749	family	Ribosomal protein L15, bacterial-type	1	AUR62035212-RA
