# Supplementary material for: Preparation and analysis of quinoa active protein (QAP) and its mechanism of inhibiting Candida albicans from a transcriptome perspective
Source: PeerJ. 2025 Feb 14;13:e18961. doi: 10.7717/peerj.18961 (PMC11831975; doi:10.7717/peerj.18961)
Supplement: Supplemental Information 11 [file peerj-13-18961-s011.xlsx]

## Sheet: Sheet1
G75	G50
AUR62002139-RA	AUR62017741-RA
AUR62011869-RA	AUR62011869-RA
AUR62024716-RA	AUR62024716-RA
AUR62032929-RA	AUR62032926-RA
AUR62006360-RA	AUR62015570-RA
AUR62032926-RA	AUR62043467-RA;AUR62021937-RA
AUR62029196-RA	AUR62004958-RA
AUR62043467-RA;AUR62021937-RA	AUR62038764-RA;AUR62020618-RA;AUR62009044-RA
AUR62032931-RA	AUR62006386-RA
AUR62028591-RA	AUR62039382-RA;AUR62014579-RA
AUR62025870-RA	AUR62041490-RA;AUR62037657-RA
AUR62015570-RA	AUR62012951-RA
AUR62040536-RA	AUR62039001-RA
AUR62039712-RA	AUR62001811-RA
AUR62031439-RA	AUR62031519-RA
AUR62044500-RA;AUR62044340-RA	AUR62024712-RA
AUR62035617-RA	AUR62001001-RA
AUR62015174-RA	AUR62028718-RA;AUR62008136-RA
AUR62044656-RA;AUR62027945-RA;AUR62027941-RA;AUR62027933-RA;AUR62027932-RA;AUR62020772-RA;AUR62020771-RA;AUR62020770-RA;AUR62020767-RA	AUR62004284-RA
AUR62024712-RA	AUR62025560-RA
AUR62001811-RA	AUR62029720-RA
AUR62006284-RA	AUR62035212-RA;AUR62002860-RA
AUR62012951-RA	AUR62031439-RA;AUR62021100-RA
AUR62015569-RA	AUR62028706-RA
AUR62041432-RA;AUR62033562-RA	AUR62031316-RA
AUR62030978-RA	AUR62035617-RA
AUR62029572-RA	AUR62029725-RA
AUR62019540-RA
AUR62024157-RA;AUR62005573-RA
AUR62022530-RA
AUR62017741-RA
AUR62039374-RA;AUR62012092-RA
AUR62015572-RA
AUR62025011-RA
AUR62001001-RA
AUR62020909-RA
AUR62036893-RA
AUR62000839-RA
AUR62020618-RA
AUR62038925-RA
AUR62009367-RA
AUR62031316-RA
AUR62040890-RA
AUR62042922-RA;AUR62018034-RA;AUR62015238-RA
AUR62022853-RA;AUR62012221-RA
AUR62031519-RA
AUR62038844-RA
AUR62039001-RA
AUR62035093-RA;AUR62016175-RA
AUR62036698-RA
AUR62038553-RA
AUR62013484-RA
AUR62039857-RA
AUR62029688-RA
AUR62013896-RA
AUR62024355-RA
AUR62012879-RA
AUR62029991-RA
AUR62020601-RA
AUR62003182-RA
AUR62039595-RA
AUR62003403-RA
AUR62026335-RA
AUR62021346-RA
AUR62019063-RA
AUR62026025-RA;AUR62024433-RA
AUR62033587-RA
AUR62033617-RA;AUR62032727-RA;AUR62028108-RA;AUR62005958-RA
AUR62033738-RA;AUR62029956-RA
AUR62030790-RA
AUR62039005-RA;AUR62038932-RA
AUR62020570-RA;AUR62009102-RA
AUR62041751-RA
AUR62010089-RA
AUR62031065-RA;AUR62026056-RA;AUR62024465-RA;AUR62008303-RA
AUR62035682-RA;AUR62017128-RA
AUR62009776-RA
AUR62026355-RA
AUR62017949-RA;AUR62003639-RA
AUR62001816-RA
AUR62029726-RA
AUR62006386-RA
AUR62042305-RA;AUR62037601-RA
AUR62009617-RA
AUR62032318-RA
AUR62006034-RA
AUR62008609-RA
AUR62020539-RA;AUR62015664-RA
AUR62005133-RA;AUR62000840-RA
AUR62029720-RA
AUR62004284-RA
AUR62027103-RA
AUR62041158-RA
AUR62009794-RA
AUR62009632-RA;AUR62001843-RA
AUR62040749-RA;AUR62037642-RA
AUR62030870-RA;AUR62027027-RA
AUR62020865-RA;AUR62018554-RA
AUR62021097-RA
AUR62027317-RA;AUR62007415-RA
AUR62033546-RA
AUR62034727-RA
AUR62021100-RA
AUR62004958-RA
AUR62022089-RA
