# Supplementary material for: Preparation and analysis of quinoa active protein (QAP) and its mechanism of inhibiting Candida albicans from a transcriptome perspective
Source: PeerJ. 2025 Feb 14;13:e18961. doi: 10.7717/peerj.18961 (PMC11831975; doi:10.7717/peerj.18961)
Supplement: Supplemental Information 12 [file peerj-13-18961-s012.xlsx]

## Sheet: Sheet1
Figure 7-Column Chart of Inhibition Zone Diameter of QAP-treated C. albicans.	G75	G50	FLC
(mm)	20.08	24.55	17.55
	20.53	25.51	19.51
	21.15	25.52	19.57
