# Supplementary material for: Preparation and analysis of quinoa active protein (QAP) and its mechanism of inhibiting Candida albicans from a transcriptome perspective
Source: PeerJ. 2025 Feb 14;13:e18961. doi: 10.7717/peerj.18961 (PMC11831975; doi:10.7717/peerj.18961)
Supplement: Supplemental Information 13 [file peerj-13-18961-s013.xlsx]

## Sheet: Sheet1
Figure 8-Changes of extracellular alkaline phosphatase activity of C. albicans after QAP treatment	CK	QAP
(U/100mL)	0.575628	1.04103
	0.734844	1.04715
	0.557257	0.875689
