# Supplementary material for: Preparation and analysis of quinoa active protein (QAP) and its mechanism of inhibiting Candida albicans from a transcriptome perspective
Source: PeerJ. 2025 Feb 14;13:e18961. doi: 10.7717/peerj.18961 (PMC11831975; doi:10.7717/peerj.18961)
Supplement: Supplemental Information 14 [file peerj-13-18961-s014.xlsx]

## Sheet: Sheet1
Figure 10-Growth dynamics of C. albicans in the presence of QAP	Time (h)	QAP1	QAP2	QAP3	CK1	CK2	CK3
(nm)	0	0.064	0.062	0.064	0.065	0.066	0.063
	1.5	0.081	0.072	0.092	0.11	0.109	0.113
	3	0.113	0.099	0.137	0.17	0.172	0.166
	4.5	0.195	0.183	0.245	0.265	0.215	0.261
	6	0.273	0.254	0.277	0.354	0.334	0.36
	7.5	0.322	0.302	0.331	0.509	0.472	0.51
	9	0.389	0.371	0.389	0.644	0.621	0.645
	10.5	0.418	0.382	0.422	0.722	0.701	0.725
	12	0.421	0.415	0.43	0.818	0.81	0.822
	13.5	0.446	0.423	0.449	0.878	0.855	0.891
	15	0.46	0.457	0.466	0.973	0.95	0.963
	16.5	0.485	0.481	0.492	1.041	0.992	1.005
	18	0.506	0.498	0.511	1.065	1.013	1.027
	19.5	0.514	0.505	0.521	1.168	1.112	1.103
	21	0.539	0.518	0.539	1.207	1.164	1.188
	22.5	0.555	0.541	0.559	1.218	1.201	1.209
	24	0.575	0.566	0.574	1.225	1.217	1.229
	25.5	0.587	0.576	0.593	1.278	1.255	1.291
	27	0.615	0.592	0.608	1.363	1.336	1.375
	28.5	0.627	0.611	0.621	1.384	1.367	1.394
	30	0.636	0.615	0.627	1.402	1.395	1.411
