# Supplementary material for: Preparation and analysis of quinoa active protein (QAP) and its mechanism of inhibiting Candida albicans from a transcriptome perspective
Source: PeerJ. 2025 Feb 14;13:e18961. doi: 10.7717/peerj.18961 (PMC11831975; doi:10.7717/peerj.18961)
Supplement: Supplemental Information 15 [file peerj-13-18961-s015.xlsx]

## Sheet: Sheet1
SDH	CK	QAP1	QAP2	QAP3	FLC1	FLC2	FLC3
(U/L)	414.911	331.329	348.754	364.967	312.973	315.861	345.679
	414.632	342.977	348.661	362.917	323.782	315.954	349.033
	401.866	333.006	339.436	369.719	326.111	318.657	348.94
	399.816	330.397	330.304	354.251	307.102	326.577	336.547
Ca2+-Mg2+-ATPase	CK	QAP1	QAP2	QAP3	FLC1	FLC2	FLC3
(IU/L)	100.697	91.633	95.44	86.648	75.025	80.01	76.724
	96.867	92.676	92.494	86.195	75.478	80.667	77.902
	98.431	93.083	93.083	86.694	75.455	80.1	76.679
	98.227	93.967	90.387	88.869	74.889	79.194	79.466
CAT	CK	QAP1	QAP2	QAP3	FLC1	FLC2	FLC3
(U/mL)	13.75	19.983	17.21	19.128	17.392	16.08	18.588
	13.732	19.314	17.959	19.283	17.383	16.528	18.535
	14.468	20.01	17.321	18.614	17.485	16.196	17.697
	14.175	20.36	17.184	18.145	17.082	16.47	18.176
