# Supplementary material for: Preparation and analysis of quinoa active protein (QAP) and its mechanism of inhibiting Candida albicans from a transcriptome perspective
Source: PeerJ. 2025 Feb 14;13:e18961. doi: 10.7717/peerj.18961 (PMC11831975; doi:10.7717/peerj.18961)
Supplement: Supplemental Information 16 [file peerj-13-18961-s016.xlsx]

## Sheet: Sheet1
sample	CK1	CK2	CK3	TREAT1	TREAT2	TREAT3
ALS2	17845	16966	23257	121395	111007	100862
APE2	53778	52126	63877	16784	16870	17831
PHO113	925	758	1151	3005	4348	4103
SUN41	11348	10583	13460	24177	24813	26050
ECM331	2456	2376	3047	781	622	738
GCA1	950	1076	1155	6205	3653	5328
PCK1	41883	45580	50050	3857	971	1975
ERG20	17729	23652	20619	3932	4515	5242
ERG7	6161	6670	7218	2700	2968	3136
ERG24	3455	3659	4153	1474	1824	1575
ERG8	3624	4032	4493	1457	1671	1877
DAP1	3158	3506	3534	1153	1108	860
ERG4	5316	6554	6613	2425	2805	3008
ERG1	10318	12021	12435	4345	5384	5771
ERG13	9349	11253	10624	4678	4698	4566
CYB2	18111	13300	22230	1930	1141	793
FBA1	158961	200781	174344	52839	30793	45818
GPM1	57750	84513	65055	15931	19106	24318
PGA6	2471	3310	3225	858	1031	1308
CAT1	33183	26062	40859	4227	2729	1900
PLB1	3362	4461	3640	395	372	367
FIG1	186	180	276	561	542	437
YPS7	2340	3526	3147	6350	6782	5904
GCV1	12213	11196	13719	1476	1517	1322
CDC11	3953	4997	4562	1550	1938	2127
SIM1	19646	22125	21623	36808	81035	59963
RBT1	912	683	1060	1715	1692	1614
IDP2	2449	3293	3324	585	263	284
CYP1	34811	41090	38283	17556	15072	18139
SAP10	4663	4215	5752	7863	13295	9313
CAALFM_C210330CA	932	876	1136	236	378	462
GCA2	889	837	1185	3206	1701	2224
CDC19	113241	166422	125619	51113	49365	65515
TPI1	74927	85231	81762	40056	25520	32063
SPR28	1229	1314	1283	1808	3579	2589
CYC1	4533	5343	4982	486	880	794
HSP90	22849	36540	24248	10455	12321	13151
MNN22	38385	35857	46348	8575	3394	5144
ANP1	2385	2739	3242	945	954	1227
CAALFM_C306410CA	1136	1484	1513	564	593	670
MNN9	3474	3972	3933	1260	1925	1688
CAALFM_C210200WA	1560	1849	1600	293	579	613
MNN24	3573	3647	4451	2238	1085	1466
SDH2	11315	12054	13074	2862	2776	2329
ACO1	32532	31440	40973	11689	11283	5876
INO1	8944	17290	10988	2408	2310	1404
SDH12	14434	16187	18362	4658	6020	4667
RIP1	8268	9037	8866	3047	3627	3499
QCR2	15483	17103	17708	5411	7109	7687
CAALFM_C304080WA	5165	5012	5371	1699	2302	1628
CAALFM_CR10140WA	9415	10302	13477	3374	5033	4207
CAALFM_C201690WA	4972	5755	5697	683	981	1249
ADH1	619736	839259	728011	308774	197950	328724
DLD1	11205	8699	12973	5361	3258	2852
ADH5	67346	55175	84324	40351	17289	19741
ACH1	14213	16240	17555	9176	3464	2674
MDH1	22834	22453	28907	16051	3567	4692
MLS1	55251	36179	67158	25415	5791	4428
GLO2	5632	5416	7373	1265	1766	1599
AIP2	12491	11738	14825	4636	4995	5326
PRA1	525	536	676	277328	347999	290935
CYT1	7529	9145	8324	1311	2924	2621
ALI1	2465	2462	2829	581	1154	815
QCR9	1809	2185	2188	673	1047	947
RBT5	1530	1430	1836	122521	118214	147310
CAALFM_C109020WA	3014	2903	3552	823	1587	1202
CAALFM_C105180CA	855	942	960	215	414	402
CAALFM_C100700WA	1509	1553	1625	471	806	773
CAALFM_C200400CA	3389	3574	4262	968	2021	1380
PGA7	727	648	869	26797	22645	24003
PHO112	444	385	562	1198	1656	1366
PLB3	7542	7162	9996	17213	16707	17850
PLB5	5425	4957	6341	12754	11798	11650
GAP1	20202	20314	26176	40920	57510	51642
SAP99	286	253	294	1641	944	1113
SAP98	111	140	113	687	465	482
PRY1	177	139	152	694	678	463
MET6	89365	101724	107420	32482	22394	21618
PHO114	1243	1381	1729	2421	3420	3148
MNN10	3399	3785	3966	1365	1514	1658
MNN21	6269	7092	7998	3081	3037	3193
IFM3	2289	1788	2706	6855	8520	8001
QCR7	3742	4768	4284	827	2305	1798
CAALFM_C208850CA	3882	3761	4673	1509	1655	1702
CAALFM_C503770CA	863	882	1119	2258	3263	2652
CSA1	3723	3449	4450	66653	43503	40426
GLX3	8839	13598	10842	120288	140010	140270
CAALFM_C601780CA	594	908	899	1981	2644	2894
GCV3	10063	11915	11928	4300	4976	5179
CAALFM_C102890CA	801	965	1097	2116	3149	2208
ALS4	25095	22415	33659	352502	308691	281050
SOD5	2737	1849	3585	6282	3952	5248
CAALFM_CR08380CA	49	68	83	111	169	106
CAALFM_C107040CA	109	66	143	44	24	39
HWP1	119	35	121	257	234	179
PGA30	11	17	23	78	35	24
PHR1	25306	17401	32339	17389	4697	4729
CAALFM_C505020CA	9544	10314	11541	2897	3283	3819
CDA2	343	519	419	4413	5850	2388
CAALFM_C302060WA	430	364	462	918	979	829
GCV2	27026	21336	32855	9406	6854	6197
SHM2	64890	62198	82641	24844	12120	17493
