# Supplementary material for: Preparation and analysis of quinoa active protein (QAP) and its mechanism of inhibiting Candida albicans from a transcriptome perspective
Source: PeerJ. 2025 Feb 14;13:e18961. doi: 10.7717/peerj.18961 (PMC11831975; doi:10.7717/peerj.18961)
Supplement: Supplemental Information 17 [file peerj-13-18961-s017.xlsx]

## Sheet: Sheet1
PLB1	CK	QAP
	0.928589	0.342247
	0.974755	0.448479
	1.09666	0.43021
FBA1	0.997207	0.527033
	1.03955	0.576729
	0.963239	0.576729
SDH2	1.00868	0.283707
	1.03704	0.293712
	0.954273	0.339733
MET6	0.942832	0.257934
	1.15274	0.24402
	0.904425	0.29019
ACO1	0.937748	0.686472
	0.97757	0.71068
	1.08468	0.73066
ALS4	0.806213	1.98513
	1.18037	1.93085
	1.01342	1.86508
CAT1	0.992407	0.857972
	1.04899	0.919552
	0.958602	0.778626
SIM1	1.06213	1.58773
	1.02595	1.17851
	0.911912	1.66667
PCK1	1.11923	0.518532
	1.00871	0.688967
	0.872064	0.616642
CST20	0.995368	0.675161
	0.995368	0.703832
	1.00926	0.718621
ERG1	1.02538	0.495224
	1.01126	0.512688
	0.963364	0.50563
ZRT1	0.929605	2.15053
	1.05313	2.32091
	1.01726	2.4363
PRA1	0.997591	1.06919
	0.983857	1.13801
	1.01855	1.17001
