# Supplementary material for: Preparation and analysis of quinoa active protein (QAP) and its mechanism of inhibiting Candida albicans from a transcriptome perspective
Source: PeerJ. 2025 Feb 14;13:e18961. doi: 10.7717/peerj.18961 (PMC11831975; doi:10.7717/peerj.18961)
Supplement: Supplemental Information 18 [file peerj-13-18961-s018.xlsx]

## Sheet: Sheet1
ITEM TO CHECK	IMPORTANCE	CHECKLIST
EXPERIMENTAL DESIGN
Definition of experimental and control groups	E	Line:285-289
Number within each group	E	Line:285-289
Assay carried out by core lab or investigator's lab?	D
Acknowledgement of authors' contributions	D
SAMPLE
Description	E	Line:279-291
Volume/mass of sample processed	D
Microdissection or macrodissection	E	NA
Processing procedure	E	Line:285-289
If frozen - how and how quickly?	E	Line:291-293
If fixed - with what, how quickly?	E	NA
Sample storage conditions and duration (especially for FFPE samples)	E	SR:Line 2
NUCLEIC ACID EXTRACTION
Procedure and/or instrumentation	E	Line:293-295
Name of kit and details of any modifications	E	Line:293-295
Source of additional reagents used	D
Details of DNase or RNAse treatment	E	√
Contamination assessment (DNA or RNA)	E	NA
Nucleic acid quantification	E	Line:294-295
Instrument and method	E	Line:294-295
Purity (A260/A280)	D
Yield	D
RNA integrity method/instrument	E	Line:294-295
RIN/RQI or Cq of 3' and 5' transcripts	E	NA
Electrophoresis traces	D
Inhibition testing (Cq dilutions, spike or other)	E	NA
REVERSE TRANSCRIPTION
Complete reaction conditions	E	SR:Line 3-13
Amount of RNA and reaction volume	E	SR:Line 6
Priming oligonucleotide (if using GSP) and concentration	E	SR:Line 6
Reverse transcriptase and concentration	E	SR:Line 9
Temperature and time	E	SR:Line 11
Manufacturer of reagents and catalogue numbers	D
Cqs with and without RT	D*
Storage conditions of cDNA	D
qPCR TARGET INFORMATION
If multiplex, efficiency and LOD of each assay.	E	#
Sequence accession number	E	SR:Line 15
Location of amplicon	D
Amplicon length	E	SR:Line 17
In silico specificity screen (BLAST, etc)	E	NA
Pseudogenes, retropseudogenes or other homologs?	D
Sequence alignment	D
Secondary structure analysis of amplicon	D
Location of each primer by exon or intron (if applicable)	E	NA
What splice variants are targeted?	E	NA
qPCR OLIGONUCLEOTIDES
Primer sequences	E	Line:339
RTPrimerDB Identification Number	D
Probe sequences	D**
Location and identity of any modifications	E	NA
Manufacturer of oligonucleotides	D
Purification method	D
qPCR PROTOCOL
Complete reaction conditions	E	Line:339-344
Reaction volume and amount of cDNA/DNA	E	SR:Line 20
Primer, (probe), Mg++ and dNTP concentrations	E	SR:Line 20
Polymerase identity and concentration	E	SR:Line 20
Buffer/kit identity and manufacturer	E	SR:Line 20
Exact chemical constitution of the buffer	D
Additives (SYBR Green I, DMSO, etc.)	E	SR:Line 20
Manufacturer of plates/tubes and catalog number	D
Complete thermocycling parameters	E	Line:341-344
Reaction setup (manual/robotic)	D
Manufacturer of qPCR instrument	E	Line:340-341
qPCR VALIDATION
Evidence of optimisation (from gradients)	D
Specificity (gel, sequence, melt, or digest)	E	NA
For SYBR Green I, Cq of the NTC	E	NA
Standard curves with slope and y-intercept	E	NA
PCR efficiency calculated from slope	E	NA
Confidence interval for PCR efficiency or standard error	D
r2 of standard curve	E	NA
Linear dynamic range	E	NA
Cq variation at lower limit	E	NA
Confidence intervals throughout range	D
Evidence for limit of detection	E	NA
If multiplex, efficiency and LOD of each assay.	E	NA
DATA ANALYSIS
qPCR analysis program (source, version)	E	Line:354: Excel 2016
Cq method determination	E	Line:344
Outlier identification and disposition	E	NA
Results of NTCs	E	NA
Justification of number and choice of reference genes	E	Line:343
Description of normalisation method	E	Line:344
Number and concordance of biological replicates	D
Number and stage (RT or qPCR) of technical replicates	E	SR:Line 20
Repeatability (intra-assay variation)	E	NA
Reproducibility (inter-assay variation, %CV)	D
Power analysis	D
Statistical methods for result significance	E	Line:356: one-way T-test
Software (source, version)	E	Line:360: IBM SPSS Statistics 27
Cq or raw data submission using RDML	D
Table 1. MIQE checklist for authors, reviewers and editors. All essential information (E) must be submitted with the manuscript. Desirable
information (D) should be submitted if available. If using primers obtained from RTPrimerDB, information on qPCR target, oligonucleotides,
protocols and validation is available from that source.
*: Assessing the absence of DNA using a no RT assay is essential when first extracting RNA. Once the sample has been validated as
RDNA-free, inclusion of a no-RT control is desirable, but no longer essential.
**: Disclosure of the probe sequence is highly desirable and strongly encouraged. However, since not all commercial pre-designed assay
vendors provide this information, it cannot be an essential requirement. Use of such assays is advised against.
#:Information is not available
√:Test was performed but evidence is missing
NA：Not applicable
SR:The information is in document "The detailed procedure for the qPCR experiment.".
