# Supplementary material for: Preparation and analysis of quinoa active protein (QAP) and its mechanism of inhibiting Candida albicans from a transcriptome perspective
Source: PeerJ. 2025 Feb 14;13:e18961. doi: 10.7717/peerj.18961 (PMC11831975; doi:10.7717/peerj.18961)
Supplement: Table S1 [file peerj-13-18961-s003.xlsx]

## Sheet: Sheet1
Gene name	Gnen ID	Primer
ACT1	3636195	F: ACTCTGTCTGGATTGGTGGTTC
		R: GGATGGACCAGATTCGTCGT
SDH2	3646397	F: TCCAGAGATCAAGCCACTGC
		R: CCCTTTGGACATGTTCTGGC
CAT1	3639495	F: GAGTTGGTCAACACGGTCCA
		R: ACACCATAAGCACCGGAACC
MET6	3640084	F: CGACTTGGAAGGTGCTGGTA
		R: TACCGGCTCTCAATGGCAAA
PCK1	3639701	F: GTGATGCTTCCGGTGTGTTG
		R: GTTGACCGAAACATGCGGAG
ACO1	3642090	F: GGAAACCGCCATTGCTAACG
		R: CGTGAGCACCAGCATCTTTG
PLB1	3644561	F: ATGCGCCATCATACGGAGAG
		R: TCACCTAATGGCTCACCCTT
ALS4	3647972	F: GTTCCTGCCGGATATCGTCC
		R: AGTCATCAACAGAAGCCGCA
SIM1	3636185	F: CTGGTGAAACTGCCGAAACC
		R: CTTGAAGCAACTGAGCTGGC
CST20	3637790	F: GAACGAGGGTTGCTTCTGGA
		R: TTCTCGTGCATTGGAGACCC
FBA1	3635585	F: CTGCCAGAGACAACAAGGCT
		R: ATGTAGTGAGCGGCAGCAAT
PRA1	3642969	F: GCAAGTGCTGAGGTTGTTGG
		R: AGCCCAGCCATCATTTTTGC
ZRT1	3642970	F: TTTCAGCAGGTGTGCTCCTT
		R: ACTGTTTCTCAAGTGGCCGT
ERG1	3646509	F: CCAGCTAAGGGCAAAGGTCA
		R: CGTTAGCAGCAGAAGGAGGT
