# Supplementary material for: Preparation and analysis of quinoa active protein (QAP) and its mechanism of inhibiting Candida albicans from a transcriptome perspective
Source: PeerJ. 2025 Feb 14;13:e18961. doi: 10.7717/peerj.18961 (PMC11831975; doi:10.7717/peerj.18961)
Supplement: Table S2 [file peerj-13-18961-s004.xlsx]

## Sheet: Sheet1
Description	Category	ID	p.value	adj.P.Val	Count	Gene
oxidoreductase complex	GO:CC	GO:1990204	0.000312	0.0120988	22	FET34/FTR1/GCV1/FET31/FET99/CAALFM_C501960CA/SDH2/CAALFM_C201690WA/SDH12/RIP1/GCV3/QCR2/CAALFM_C304080WA/RNR22/CAALFM_CR10140WA/GCV2/CYT1/ALI1/QCR9/CAALFM_C200400CA/IDH2/QCR7
cell wall	GO:CC	GO:0005618	0.000432	0.0145289	47	PRA1/RBT5/PGA7/ALS4/GLX3/ALS2/PLB1/CSA1/APE2/PHO113/SUN41/CAT1/CDA2/ECM331/GCA1/PHO112/PLB3/PLB5/GAP1/SAP99/SAP98/PRY1/MET6/PHO114/INO1/FBA1/GPM1/PGA6/FIG1/YPS7/CDC11/SIM1/RBT1/CYP1/SAP10/CAALFM_C210330CA/GCA2/CDC19/TPI1/SPR28/HSP90/SOD5/CAALFM_CR08380CA/CAALFM_C107040CA/HWP1/PGA30/PHR1
external encapsulating structure	GO:CC	GO:0030312	0.000432	0.0145289	47	PRA1/RBT5/PGA7/ALS4/GLX3/ALS2/PLB1/CSA1/APE2/PHO113/SUN41/CAT1/CDA2/ECM331/GCA1/PHO112/PLB3/PLB5/GAP1/SAP99/SAP98/PRY1/MET6/PHO114/INO1/FBA1/GPM1/PGA6/FIG1/YPS7/CDC11/SIM1/RBT1/CYP1/SAP10/CAALFM_C210330CA/GCA2/CDC19/TPI1/SPR28/HSP90/SOD5/CAALFM_CR08380CA/CAALFM_C107040CA/HWP1/PGA30/PHR1
integral component of plasma membrane	GO:CC	GO:0005887	0.000709	0.0204017	29	SIT1/FET34/FTR1/FET31/FET99/MEP1/OPT1/CAALFM_C100310WA/MDR1/GIT4/GIT3/PHO84/FLC3/OPT3/CAALFM_C402720CA/CWH43/XUT1/CAALFM_C601780CA/CAALFM_CR03270WA/CAALFM_C303230CA/CAALFM_C202790CA/CAALFM_C404980WA/MUP1/OPT4/TPO5/FLC2/DUR3/QDR1/OPT2
extracellular region	GO:CC	GO:0005576	0.000964	0.0261196	49	PRA1/RBT5/PGA7/ALS4/GLX3/CAALFM_C504300CA/ALS2/PLB1/SOD1/APE2/PHO113/SUN41/GDH3/SAP5/CAALFM_C503770CA/GCA1/PHO112/CHT4/PLB3/PLB5/SAP99/SAP98/PRY1/SNZ1/MET6/PHO114/GPM1/SAP6/CAALFM_C110820CA/CAALFM_C603240WA/YPS7/CAALFM_CR01280CA/SIM1/RBT1/CYP1/ACO1/SAP10/CGR1/GCA2/LIP2/TPI1/ADH1/SAP8/CAALFM_C200180CA/SOD5/CAALFM_C107040CA/HWP1/ADH2/PHR1
fungal-type cell wall	GO:CC	GO:0009277	0.001141	0.0286802	45	PRA1/RBT5/PGA7/ALS4/GLX3/ALS2/PLB1/CSA1/APE2/PHO113/SUN41/CAT1/CDA2/ECM331/PHO112/PLB3/PLB5/GAP1/SAP99/SAP98/PRY1/MET6/PHO114/INO1/FBA1/GPM1/PGA6/FIG1/YPS7/CDC11/SIM1/RBT1/CYP1/SAP10/CAALFM_C210330CA/CDC19/TPI1/SPR28/HSP90/SOD5/CAALFM_CR08380CA/CAALFM_C107040CA/HWP1/PGA30/PHR1
periplasmic space	GO:CC	GO:0042597	0.001408	0.0335668	7	PLB1/APE2/PHO113/PHO112/PLB3/PHO114/FBP1
cation transport	GO:BP	GO:0006812	0.000377	0.013833	64	ZRT2/SIT1/CFL4/FET34/MTM1/FTR1/CFL5/CFL2/FET31/CAALFM_C104010CA/FET99/CAALFM_C400990WA/FRP1/FTH1/RTA3/CFL1/CAALFM_C202180WA/MEP1/CCC2/FRE9/FRE10/MDR1/IFD6/CAALFM_C405080CA/CSH1/RHB1/HGT14/CAN1/MRS4/PHO84/CAALFM_C406770WA/GAP1/TPO4/FLC3/RIM2/XUT1/CAALFM_C700430WA/FUR4/CAALFM_CR03270WA/ARG11/CAALFM_C602150CA/FRP2/DAL4/FLU1/CAALFM_C303230CA/CYT1/CAALFM_C202790CA/TPO3/CAALFM_C404980WA/MUP1/CAALFM_C70…
organic cation transport	GO:BP	GO:0015695	0.001698	0.039486	10	RTA3/MEP1/TPO4/FLU1/CAALFM_C202790CA/RTA4/CAALFM_C206520CA/DUR3/TPO2/CAALFM_C106860WA
reactive oxygen species metabolic process	GO:BP	GO:0072593	0.001296	0.03173	14	SOD3/CCP1/SOD1/YHB1/CAT1/YHB4/CAALFM_C600850WA/YHB5/TSA1/TSA1B/FBP1/CAALFM_C500810CA/SOD5/GRX1
metal ion transport	GO:BP	GO:0030001	0.000638	0.019788	34	ZRT2/CFL4/FET34/MTM1/FTR1/CFL5/CFL2/FET31/CAALFM_C104010CA/FET99/CAALFM_C400990WA/FRP1/FTH1/CFL1/CAALFM_C202180WA/CCC2/FRE9/FRE10/IFD6/CAALFM_C405080CA/CSH1/MRS4/PHO84/CAALFM_C406770WA/GAP1/FLC3/RIM2/CAALFM_C700430WA/CAALFM_C602150CA/FRP2/CAALFM_C400820WA/FLC2/ENA2/QDR1
cellular respiration	GO:BP	GO:0045333	0.000442	0.014672	31	YMX6/CAALFM_C501960CA/SDH2/CYC1/AIP2/OSM2/CAALFM_C201690WA/SDH12/CAALFM_C303510CA/RIP1/ACO2/CAALFM_C306700CA/IDP2/FUM12/ADE17/QCR2/CAALFM_C304080WA/CAALFM_CR10140WA/NDE1/CAALFM_C502590CA/ALG6/CYT1/ALI1/ACO1/QCR9/SUV3/CAALFM_C200400CA/IDH2/QCR7/CAALFM_C503530CA/MDH1
DNA replication	GO:BP	GO:0006260	0.000592	0.018769	43	MSH2/POL3/RAD51/TOP2/CAALFM_C402600CA/CSM3/CAALFM_C403690CA/PPS1/DPB4/RFA2/RAD52/CAALFM_C101130WA/CAALFM_C112840WA/CAC2/CAALFM_C400460CA/CDC68/RFC1/RFC2/CAALFM_C703850WA/RFA1/POL1/CAALFM_C602880WA/POL2/MPH1/PSF1/CAALFM_CR03940WA/CAALFM_C505350WA/MSH6/RPO41/RNH35/YBL053/SUV3/HYS2/DPB2/DBF4/CAALFM_C600770CA/RAD53/POL30/RFC3/GIN1/CAALFM_C405230CA/PRI2/CAALFM_C107490CA
ergosterol biosynthetic process	GO:BP	GO:0006696	0.001225	0.0161414	8	ERG20/ERG7/ERG24/ERG8/DAP1/ERG4/ERG1/ERG13
oxidoreductase activity, oxidizing metal ions	GO:MF	GO:0016722	3.52e-06	0.000245	15	CFL4/FET34/CFL5/CFL2/FET31/FET99/FRP1/CAALFM_C501960CA/CFL1/FRE9/FRE10/CAALFM_C109780CA/CAALFM_C700430WA/CAALFM_C203530WA/FRP2
ferric-chelate reductase activity	GO:MF	GO:0000293	0.000307	0.012082	9	CFL4/CFL5/CFL2/FRP1/CFL1/FRE9/FRE10/CAALFM_C700430WA/FRP2
ATP-dependent RNA helicase activity	GO:MF	GO:0004004	0.000235	0.010237	20	DED1/DBP2/PRP5/CAALFM_C200410CA/CAALFM_C601040CA/SPB4/MSS116/HCA4/DRS1/DBP7/CHR1/SUV3/DBP3/CAALFM_CR07750CA/DBP8/CAALFM_C305160CA/CAALFM_CR09740WA/CAALFM_C703400CA/CAALFM_C301560WA/CAALFM_C601890CA
RNA-dependent ATPase activity	GO:MF	GO:0008186	0.000235	0.010237	20	DED1/DBP2/PRP5/CAALFM_C200410CA/CAALFM_C601040CA/SPB4/MSS116/HCA4/DRS1/DBP7/CHR1/SUV3/DBP3/CAALFM_CR07750CA/DBP8/CAALFM_C305160CA/CAALFM_CR09740WA/CAALFM_C703400CA/CAALFM_C301560WA/CAALFM_C601890CA
polyamine transmembrane transporter activity	GO:MF	GO:0015203	0.001002	0.02612	8	MDR1/TPO4/FLU1/CAALFM_C202790CA/TPO3/TPO5/DUR3/TPO2
single-stranded DNA binding	GO:MF	GO:0003697	0.001815	0.041172	20	MIS11/RAD51/MLH1/GIS2/SMC5/RFA2/RAD52/RFA1/POL1/POL2/PMS1/MIS12/CAALFM_C505350WA/ACO1/CAALFM_C700330CA/IMP4/SMC6/DLH1/CAALFM_C100160CA/PRI2
