# Supplementary material for: Preparation and analysis of quinoa active protein (QAP) and its mechanism of inhibiting Candida albicans from a transcriptome perspective
Source: PeerJ. 2025 Feb 14;13:e18961. doi: 10.7717/peerj.18961 (PMC11831975; doi:10.7717/peerj.18961)
Supplement: Table S3 [file peerj-13-18961-s005.xlsx]

## Sheet: Sheet1
ID	Description	pvalue	p.adjust	geneID	Count
ko03430	Mismatch repair	8e-10	8.75e-08	POL3/CAALFM_C109670CA/MLH1/RFA2/RFC1/RFC2/RFA1/PMS1/MSH6/POL32/HYS2/POL30/RFC3	13
ko03410	Base excision repair	2.12e-08	1.5363e-06	POL3/APN1/DPB4/CAALFM_C306400CA/POL2/CAALFM_C208420WA/POL32/HYS2/DPB2/POL30/OGG1	11
ko03032	DNA replication proteins	4.15e-08	2.2503e-06	POL3/CAALFM_C109670CA/TOP2/CAALFM_C403690CA/DPB4/RFA2/TERT/RFC1/RFC2/RFA1/POL1/CAALFM_C602880WA/POL2/PSF1/CAALFM_C505350WA/RNH35/POL32/HYS2/DPB2/CAALFM_C306630WA/CAALFM_C306640WA/POL30/RFC3/CAALFM_C107490CA	24
ko03400	DNA repair and recombination proteins	8.35e-08	3.622e-06	POL3/PPH3/CAALFM_CR05010WA/CAS1/CAALFM_C109670CA/RAD51/MLH1/APN1/CSM3/DPB4/RFA2/RAD52/CAALFM_C306400CA/RFC1/RFC2/RFA1/RNR22/MEC3/POL2/MPH1/PMS1/DUT1/CAALFM_C208420WA/MSH6/YBL053/POL32/HYS2/DPB2/CAALFM_C600770CA/POL30/RFC3/OGG1	32
ko00920	Sulfur metabolism	4.3032e-06	0.000155631	MET2/CAALFM_C704210CA/CAALFM_C111610CA/ECM17/MET10/MET15/MET16/CAALFM_C209960WA/MET14	9
ko04932	Non-alcoholic fatty liver disease	5.4105e-06	0.000167725	SDH2/CYC1/CAALFM_C201690WA/SDH12/RIP1/QCR2/CAALFM_C304080WA/CAALFM_CR10140WA/CYT1/ALI1/QCR9/CAALFM_C109020WA/CAALFM_C105180CA/CAALFM_C100700WA/CAALFM_C200400CA/QCR7	16
ko03420	Nucleotide excision repair	8.0842e-06	0.000219285	POL3/CAALFM_C109670CA/DPB4/RFA2/RFC1/RFC2/RFA1/POL2/POL32/HYS2/DPB2/POL30/RFC3	13
ko03440	Homologous recombination	3.25912e-05	0.000785811	POL3/CAALFM_C109670CA/RAD51/RFA2/RAD52/RFA1/POL32/HYS2/CAALFM_C600770CA	9
ko05415	Diabetic cardiomyopathy	4.66778e-05	0.00101291	SDH2/CAALFM_C201690WA/SDH12/RIP1/QCR2/CAALFM_C304080WA/CAALFM_CR10140WA/CYT1/ALI1/GFA1/QCR9/CAALFM_C109020WA/CAALFM_C105180CA/CAALFM_C100700WA/CAALFM_C200400CA/QCR7/GSY1	17
ko00630	Glyoxylate and dicarboxylate metabolism	0.000288695	0.00569517	GCV1/CAALFM_C208850CA/CAT1/GCV3/GCV2/SHM2/ACO1/MDH1/MLS1	9
ko00260	Glycine, serine and threonine metabolism	0.000515025	0.00859695	GCV1/SER1/AMO2/GCV3/GPM1/GCV2/CHA1/SHM2/SER2	9
ko00513	Various types of N-glycan biosynthesis	0.000673542	0.0104399	CAALFM_C505020CA/MNN10/MNN21/MNN22/ANP1/CAALFM_C306410CA/MNN9/CAALFM_C210200WA/MNN24	9
ko00620	Pyruvate metabolism	0.00106147	0.0135974	GLO2/AIP2/CYB2/PCK1/CDC19/ADH1/DLD1/ADH5/ACH1/MDH1/MLS1	11
ko00190	Oxidative phosphorylation	0.00109155	0.0135974	SDH2/CYC1/CAALFM_C201690WA/SDH12/RIP1/QCR2/CAALFM_C304080WA/CAALFM_CR10140WA/CYT1/ALI1/QCR9/CAALFM_C109020WA/CAALFM_C105180CA/CAALFM_C100700WA/CAALFM_C200400CA/QCR7	16
ko01003	Glycosyltransferases	0.00113985	0.0135974	PMT6/MNN21/MNN22/BMT8/BMT9/ALG6/MNN9/TPS2/CHS8/SMI1B/DPM1/CAALFM_C101360CA/MNN24/GSY1	14
ko00020	Citrate cycle (TCA cycle)	0.00541195	0.043496	SDH2/CAALFM_C201690WA/SDH12/PCK1/IDP2/ACO1/MDH1	7
ko03008	Ribosome biogenesis in eukaryotes	7.12e-14	7.2e-12	SNM1/NOG2/NOG1/RMP1/CAALFM_CR00460CA/UTP22/BMS1/POP3/RPP1/RIO2/CAALFM_CR09800CA/IMP4/POP4/UTP4/NOP1/HBR3/CAALFM_C503920CA/UTP15/UTP5/NOP5/RCL1/UTP8/CAALFM_CR07080WA/CAALFM_C202710CA/NAN1/CAALFM_C304380CA/CAALFM_C406210CA/UTP9/CAALFM_C602230WA/CAALFM_C110950CA/NHP2/UTP18/DIP2/UTP13/CAALFM_C112480WA/CAALFM_C302840WA	36
ko03016	Transfer RNA biogenesis	2.19e-07	1.47e-05	TRM12/CAALFM_C101150CA/CAALFM_C109390WA/ATS1/CAALFM_C114330WA/NCS2/POP3/RPP1/RIT1/CAALFM_CR00670CA/ELP3/CAALFM_C401500WA/CAALFM_C400810CA/CAALFM_C700330CA/SEN2/POP4/KTI11/CAALFM_C501610WA/CAALFM_C400940WA/CAALFM_C307400WA/CAALFM_C405260WA/THG1/CAALFM_C109790CA/KTI12/CAALFM_C702340CA/UTP8/CAALFM_C300420WA/ABP140/CAALFM_C202420CA/CAALFM_CR03160WA/SMM1/CAALFM_C206480WA/CAALFM_C403830WA/DUS4/CAALFM_C…	40
